# Supplementary material for: β-catenin, MAPK and Smad signaling during earlyXenopusdevelopment
Source: Oxford University Press journal article supplement (doi:10.1242/dev.129.1.37), 2002-01-01

$\beta$ -catenin

mask:  $\beta$ -catenin/DAPI

st8

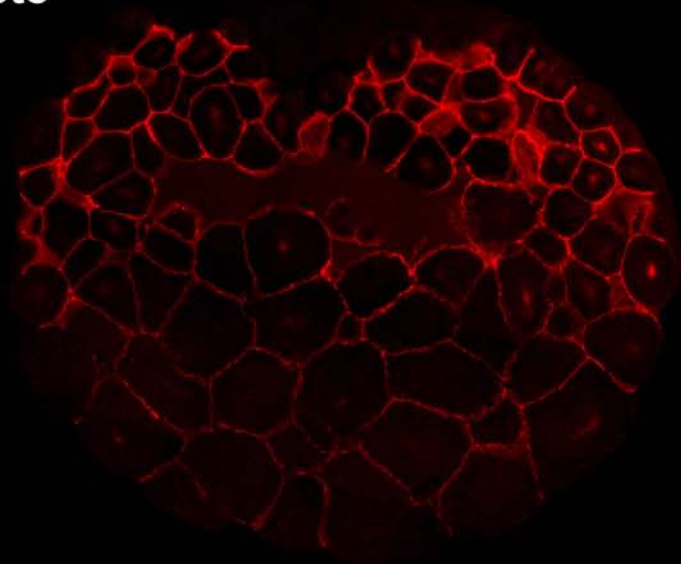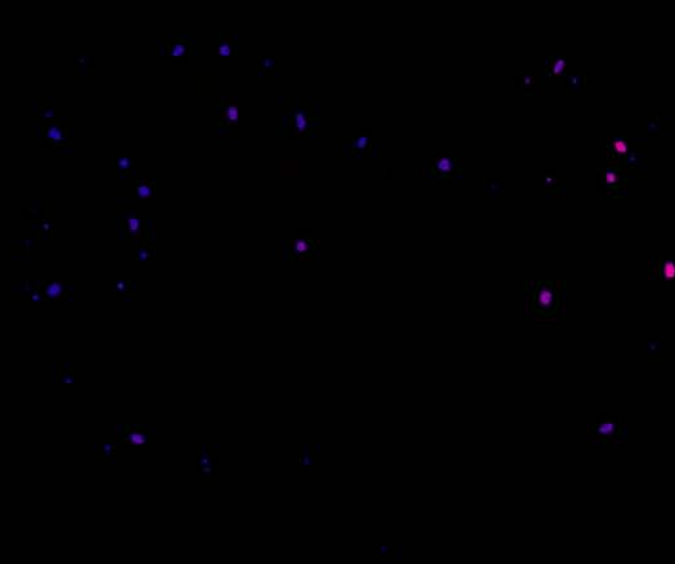

st8.5

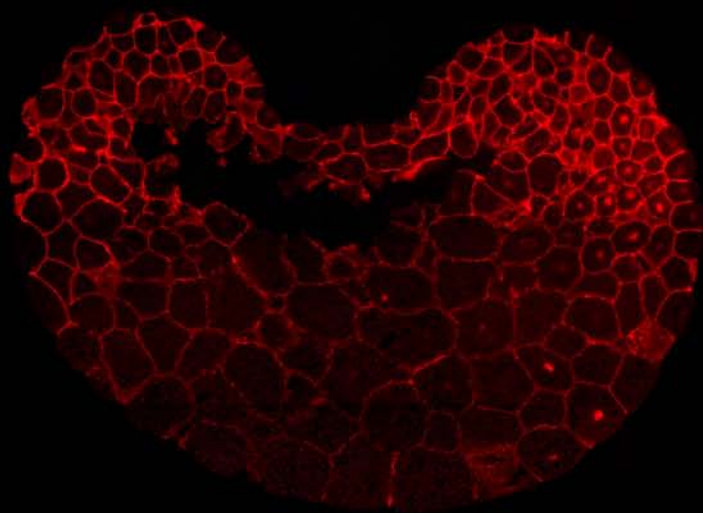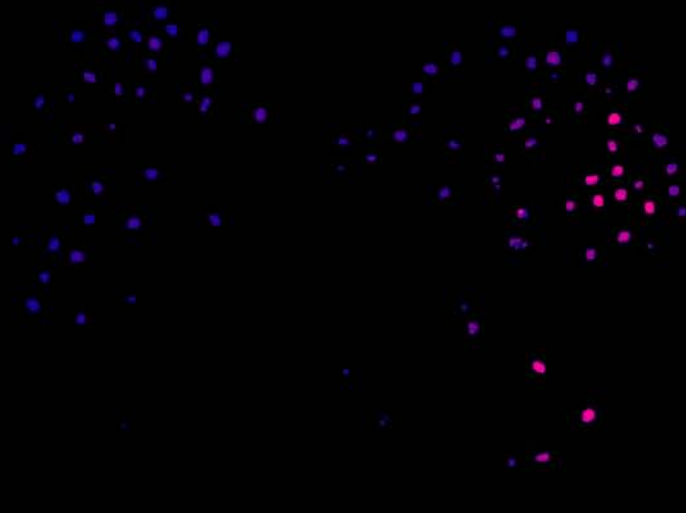

st9

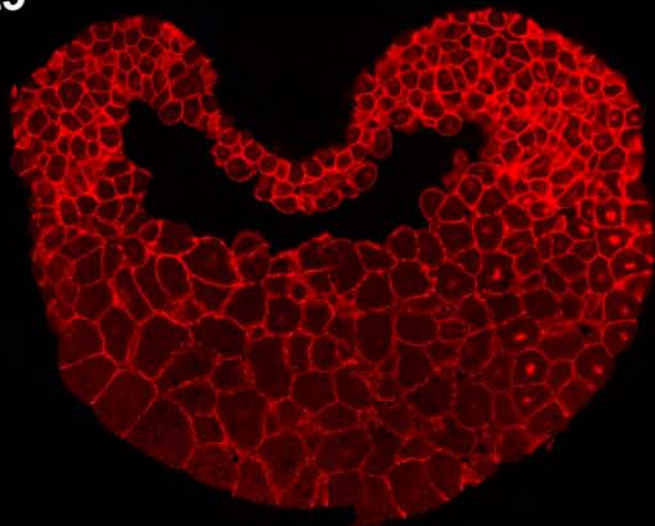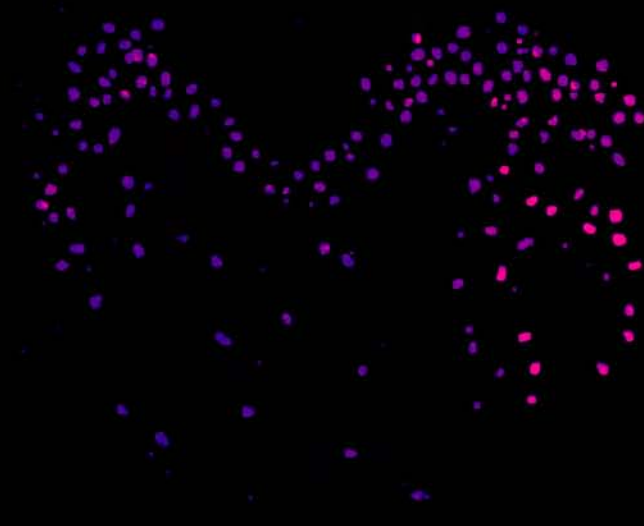

VENTRAL

DORSAL

$\beta$ -catenin

mask:  $\beta$ -catenin/DAPI

st9.5

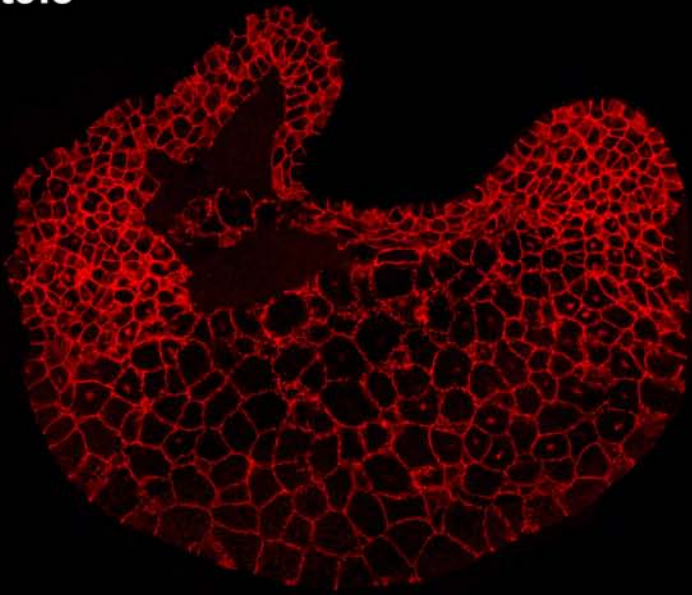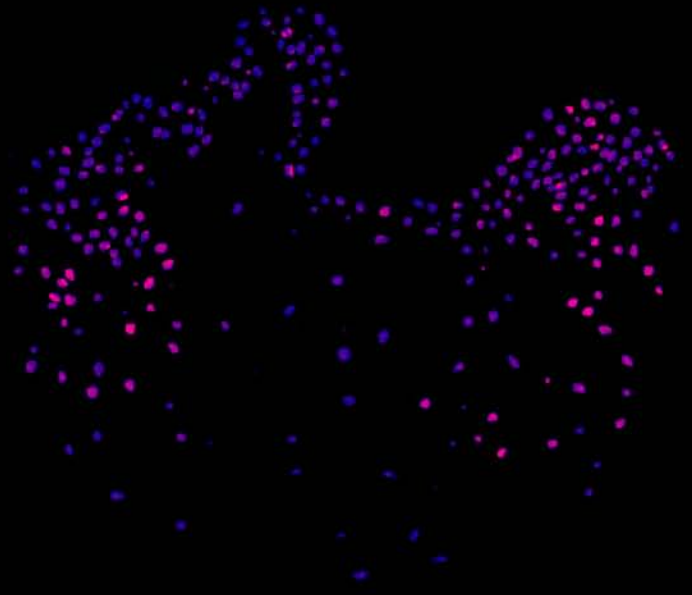

st10

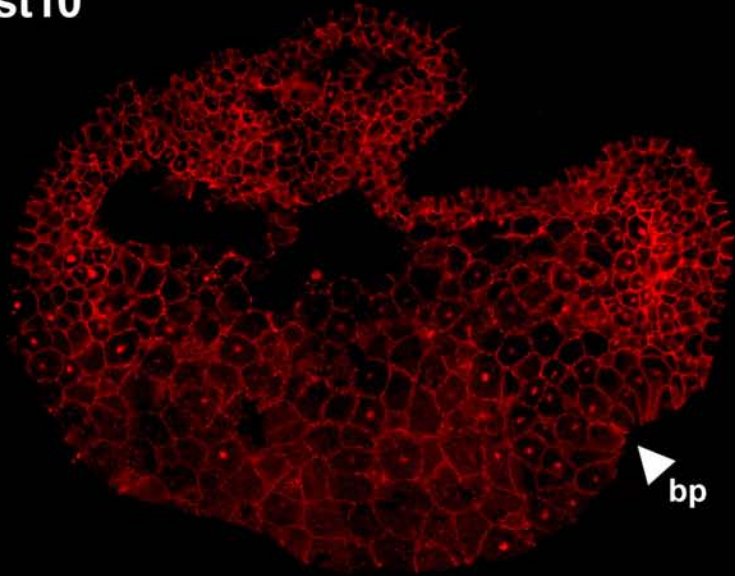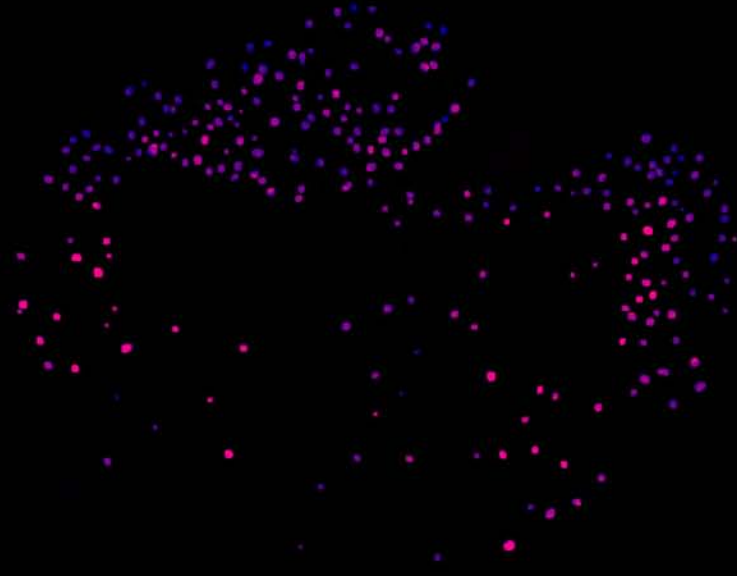

st10.25 parasagittal

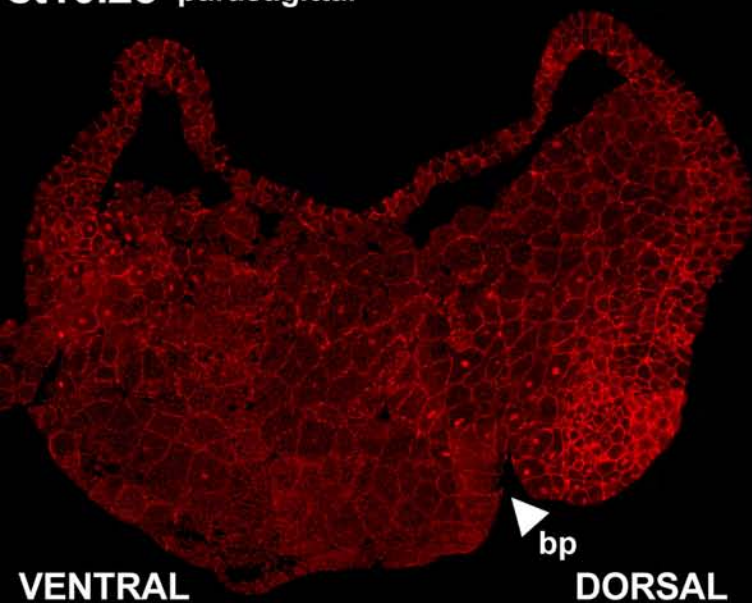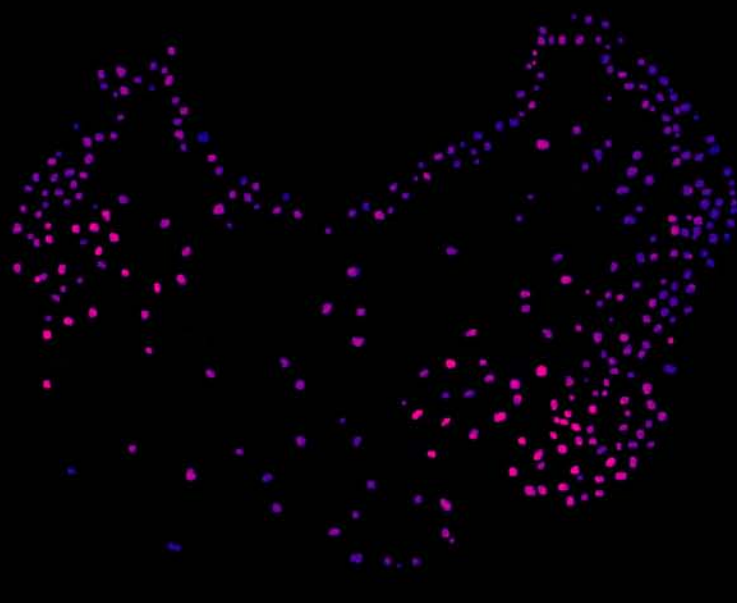

$\beta$ -catenin

mask:  $\beta$ -catenin/DAPI

st10.5  
sagittal

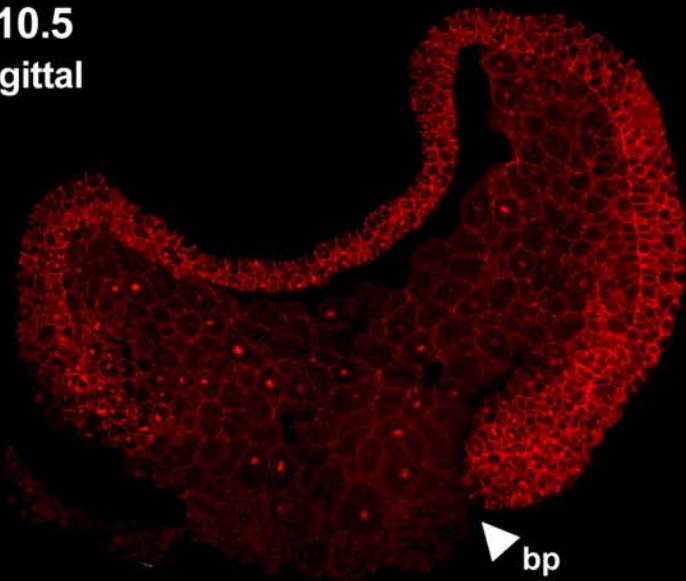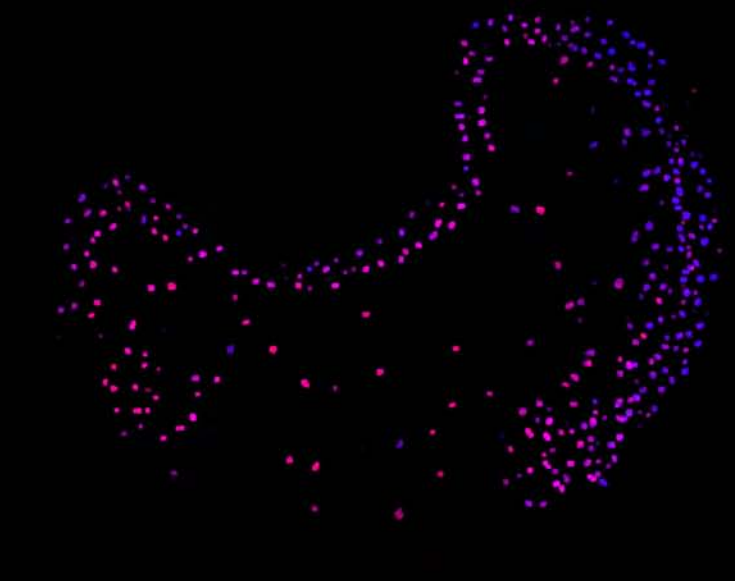

st11  
sagittal

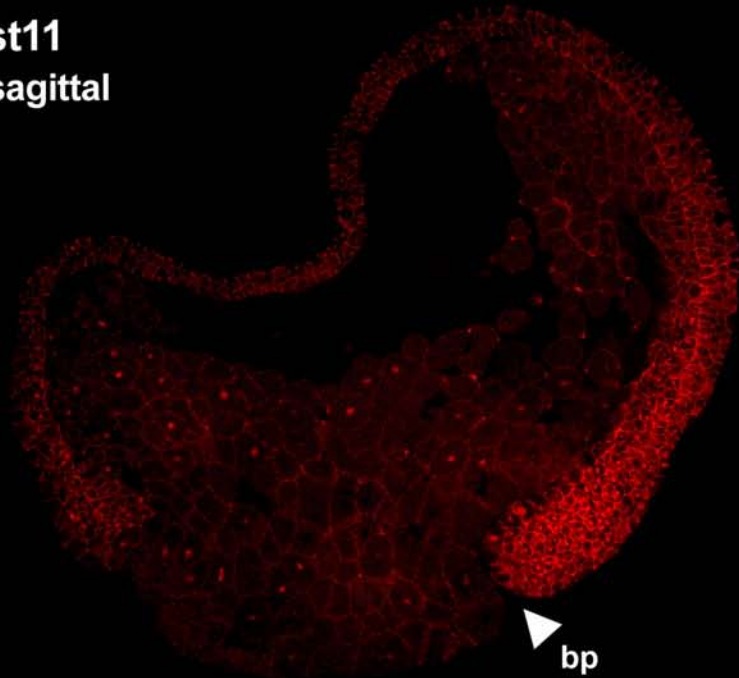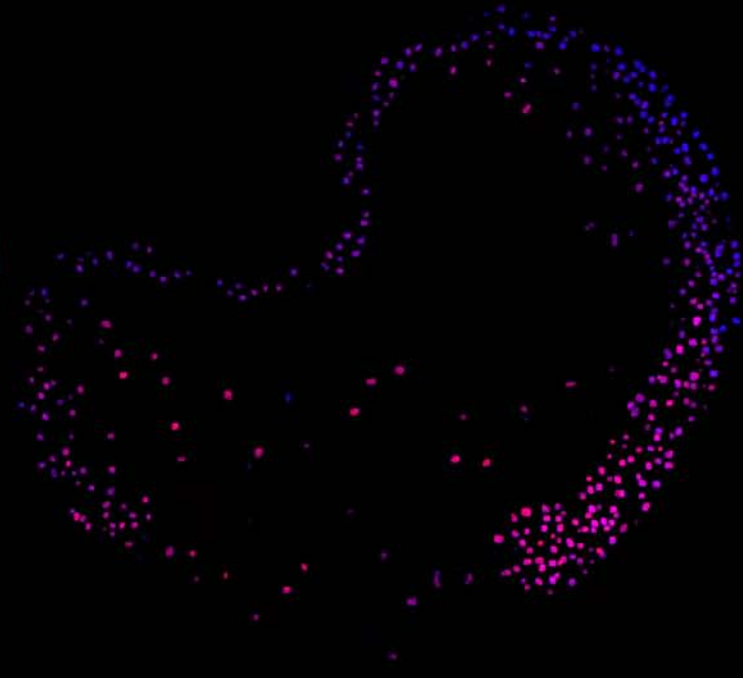

st11.5  
sagittal

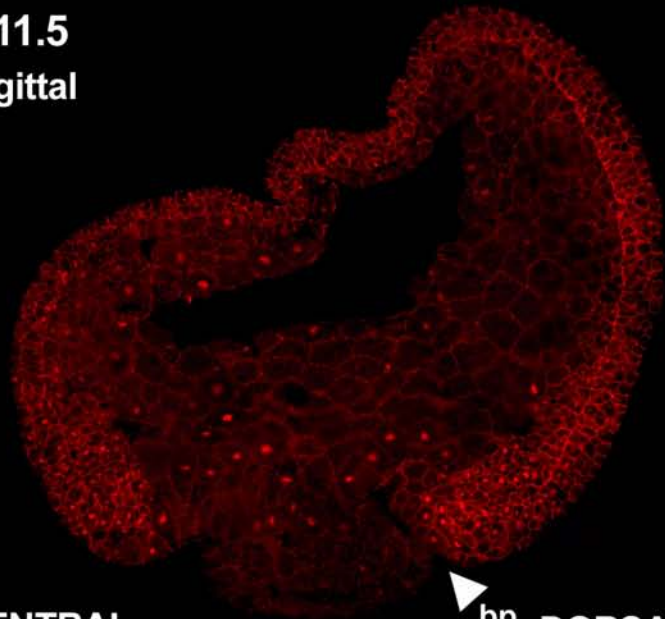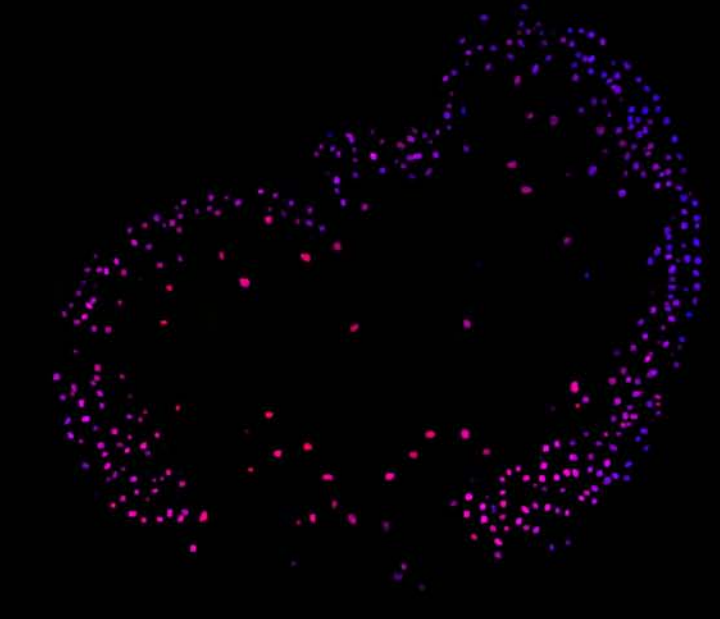

VENTRAL

bp

DORSAL

$\beta$ -catenin

mask:  $\beta$ -catenin/DAPI

st12  
sagittal

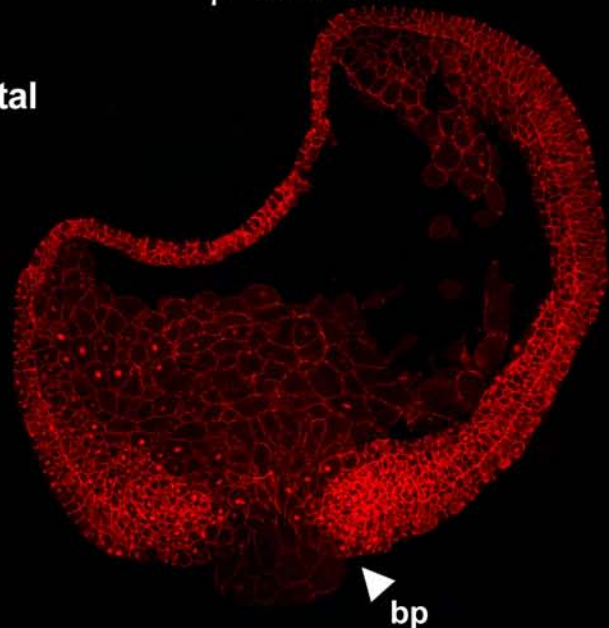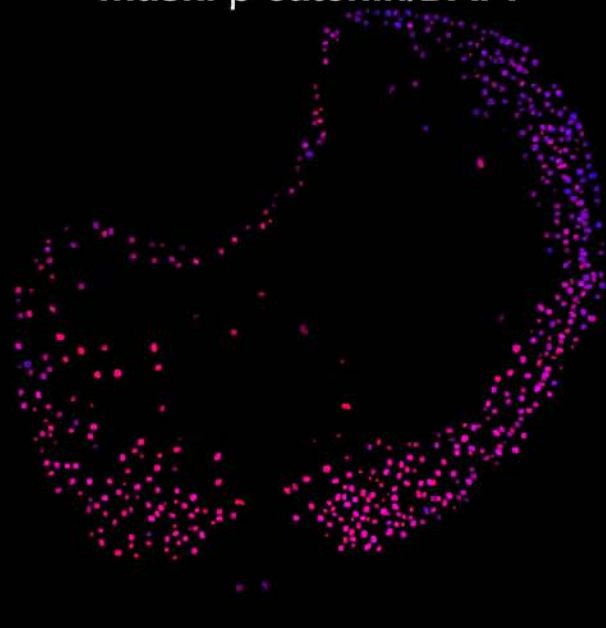

st13  
sagittal

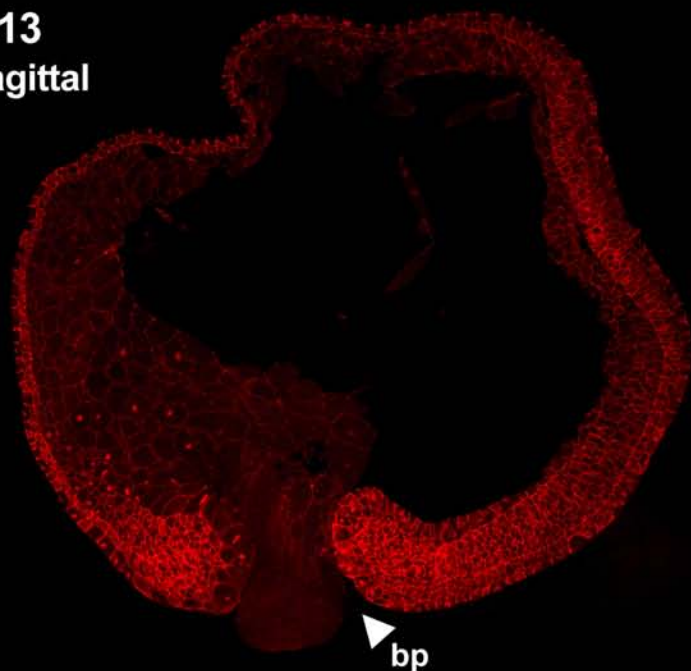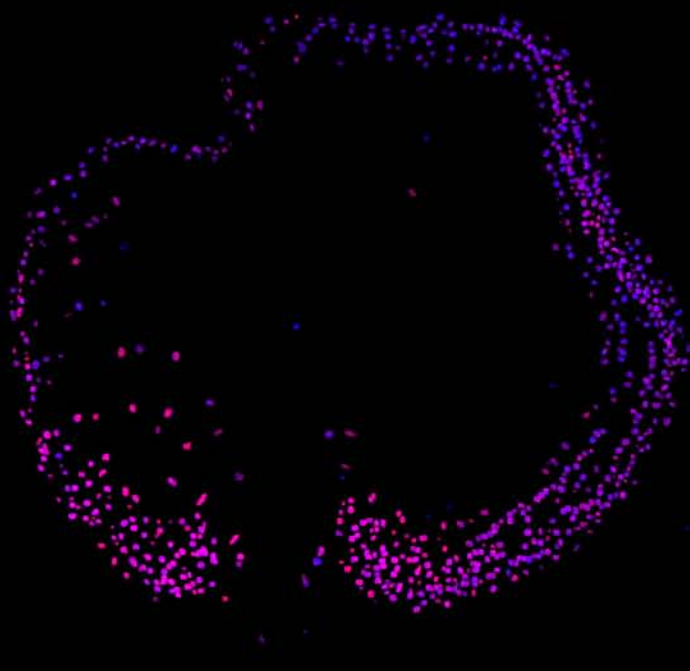

st14  
sagittal

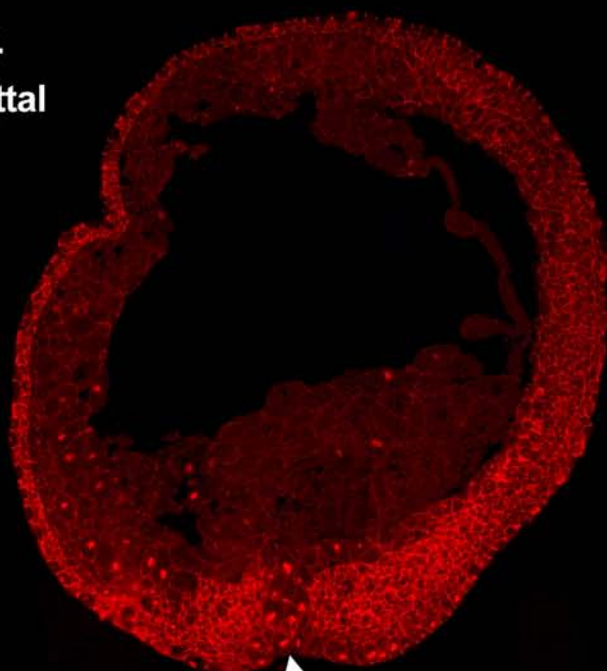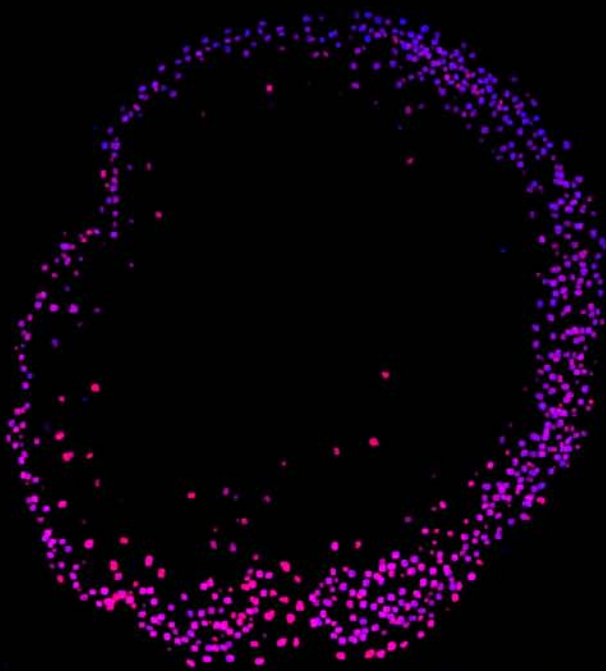

VENTRAL

bp

DORSAL

stage 16

$\beta$ -catenin

mask:  $\beta$ -catenin/P-MAPK/DAPI  
(red/green/blue)

sagittal

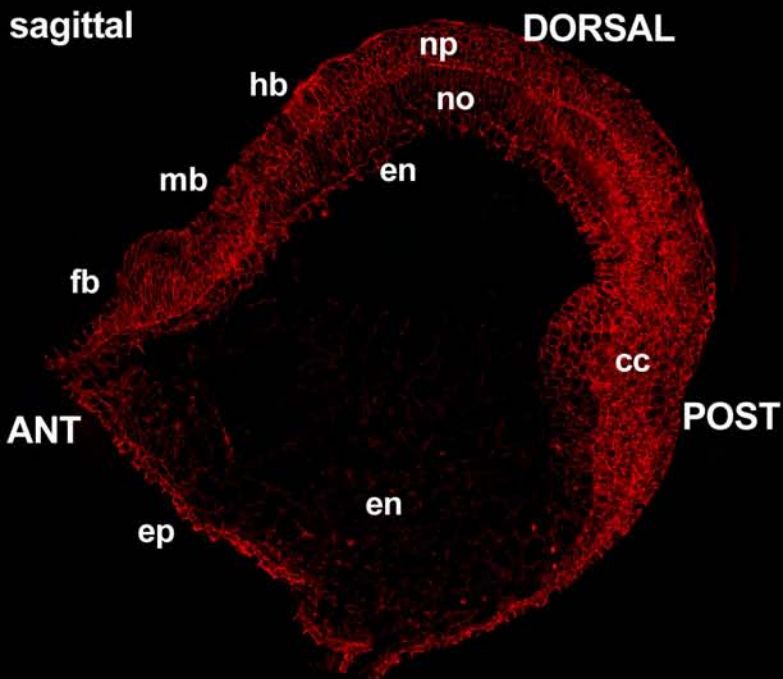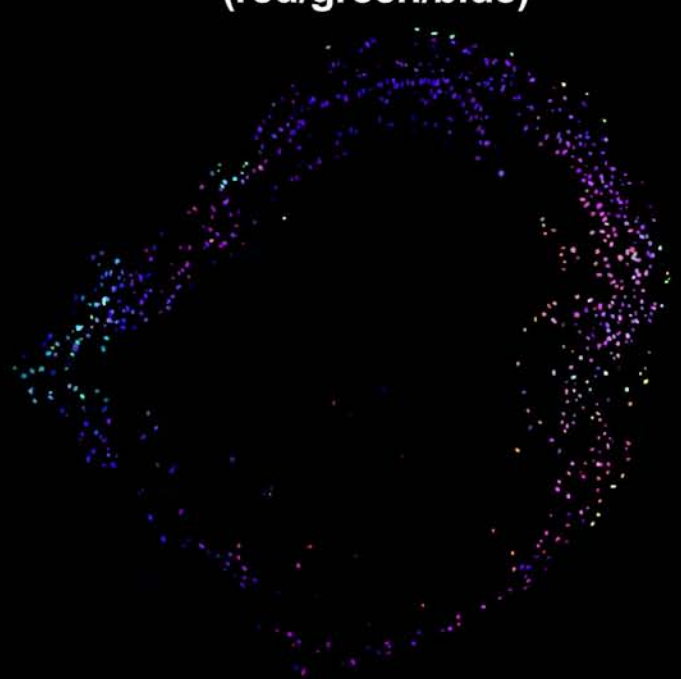

parasagittal

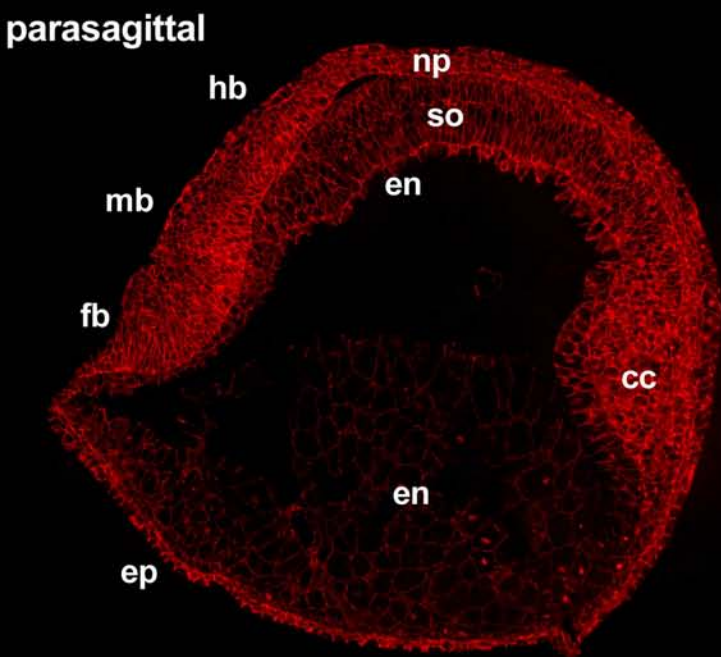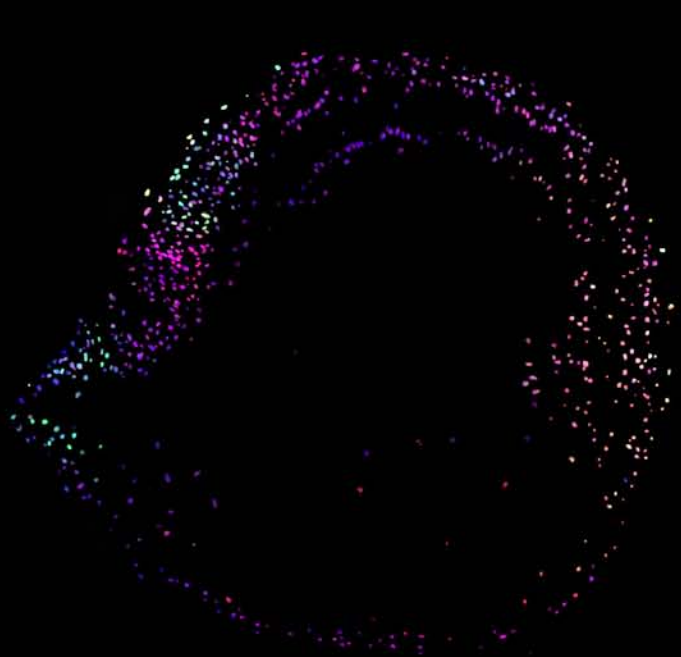

lateral

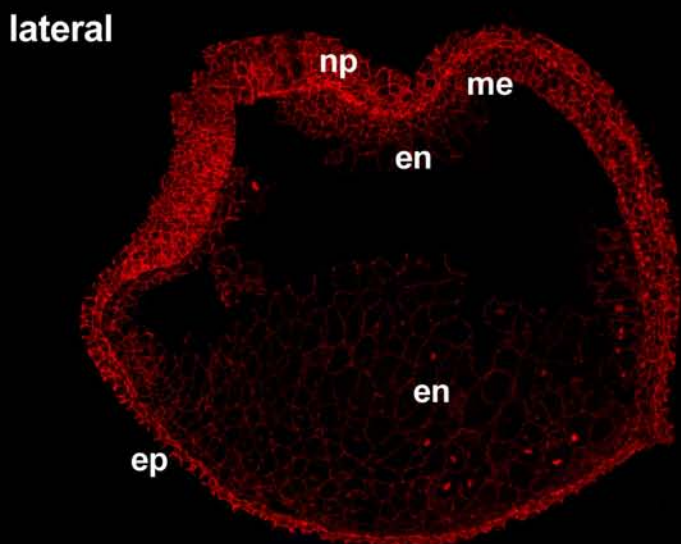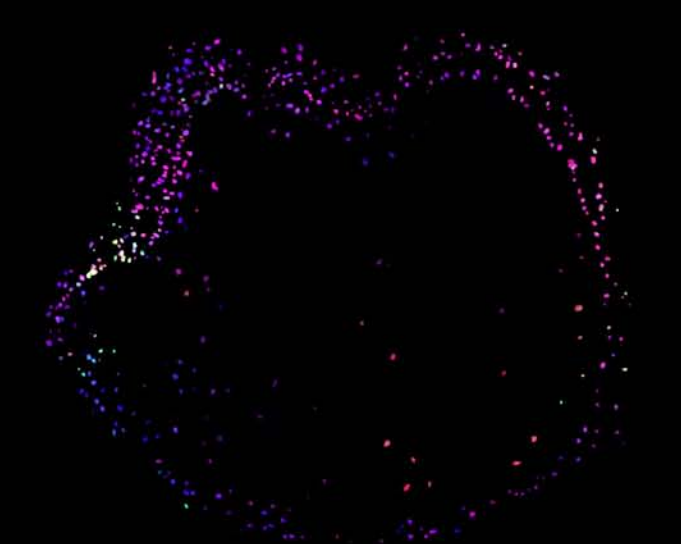

stage 20

$\beta$ -catenin

mask:  $\beta$ -catenin/DAPI

sagittal

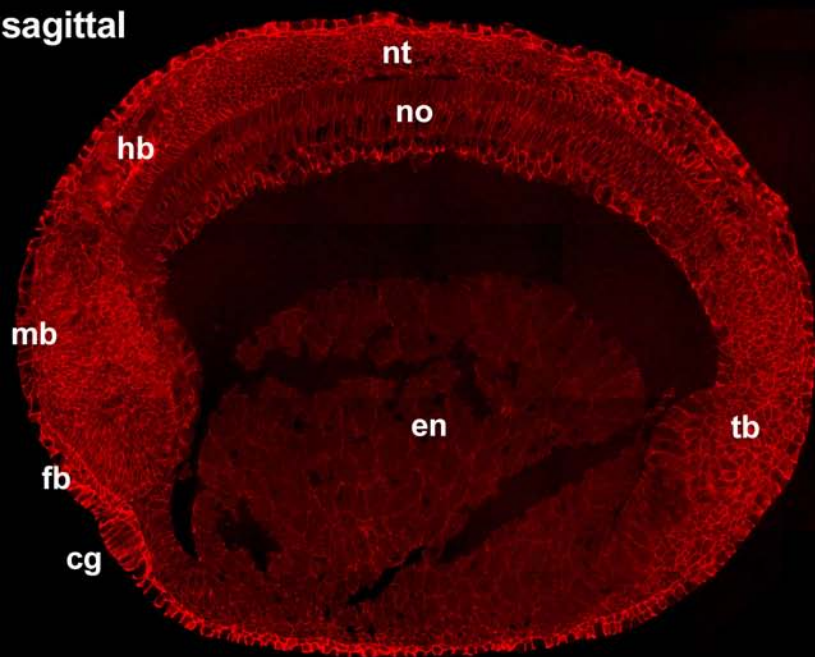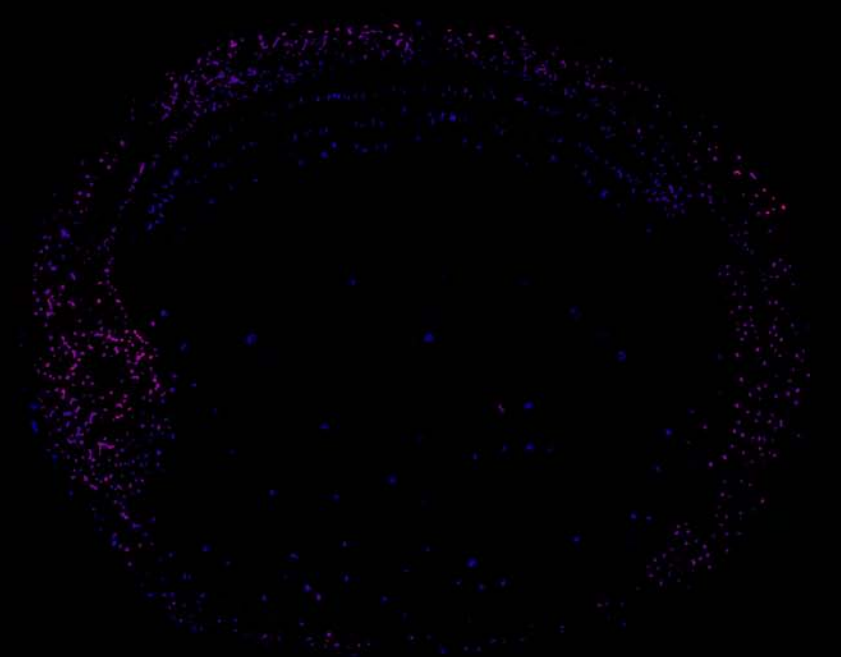

parasagittal

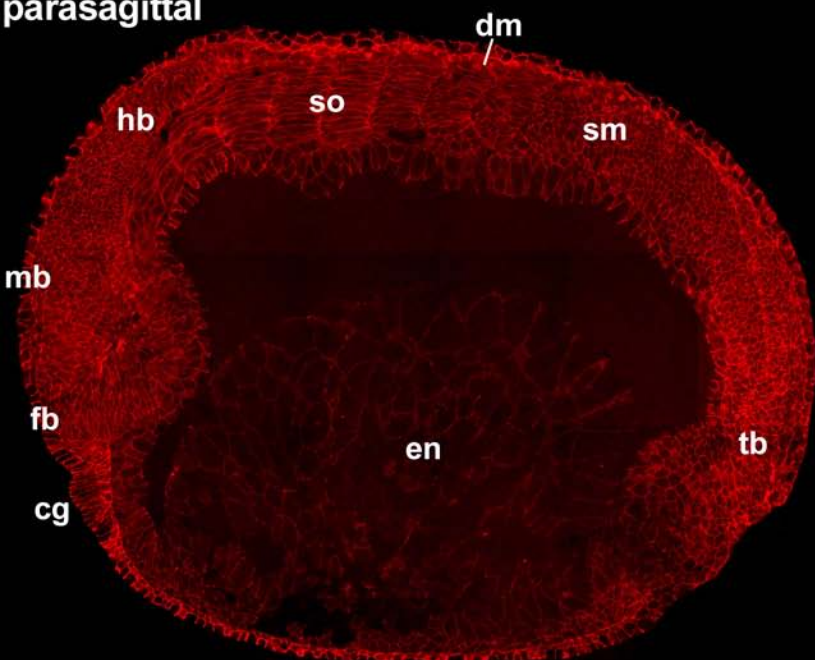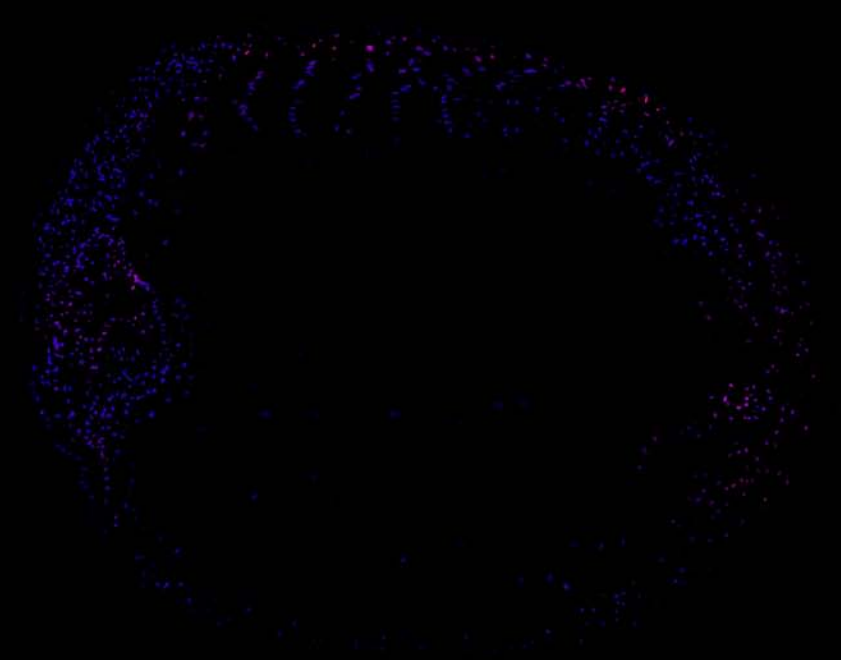

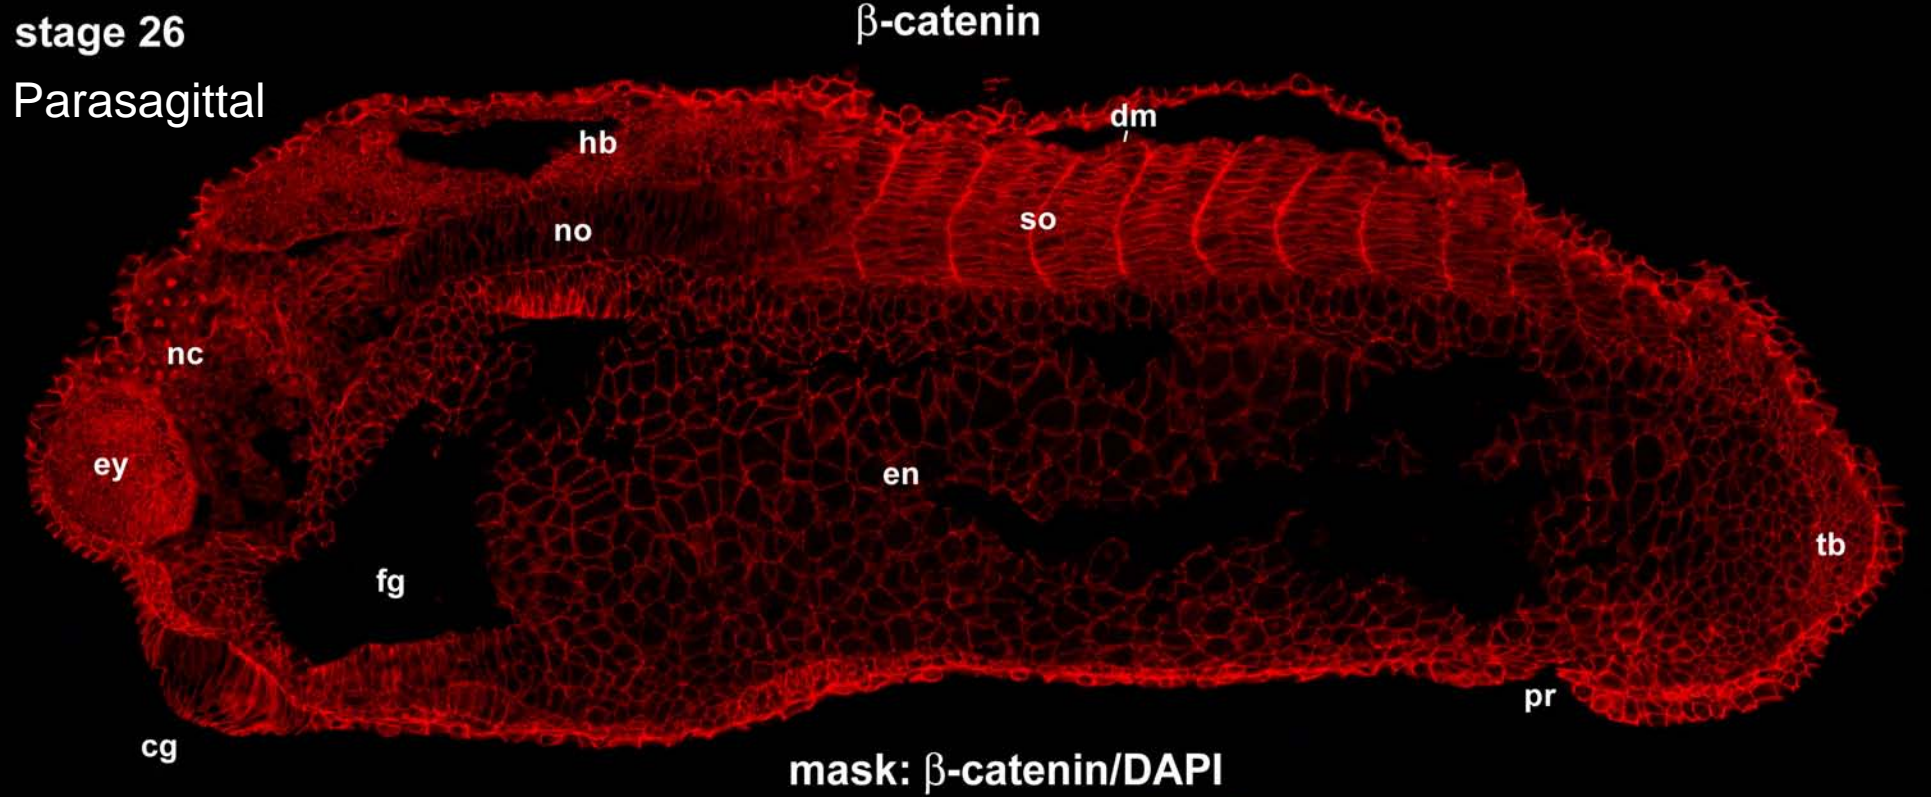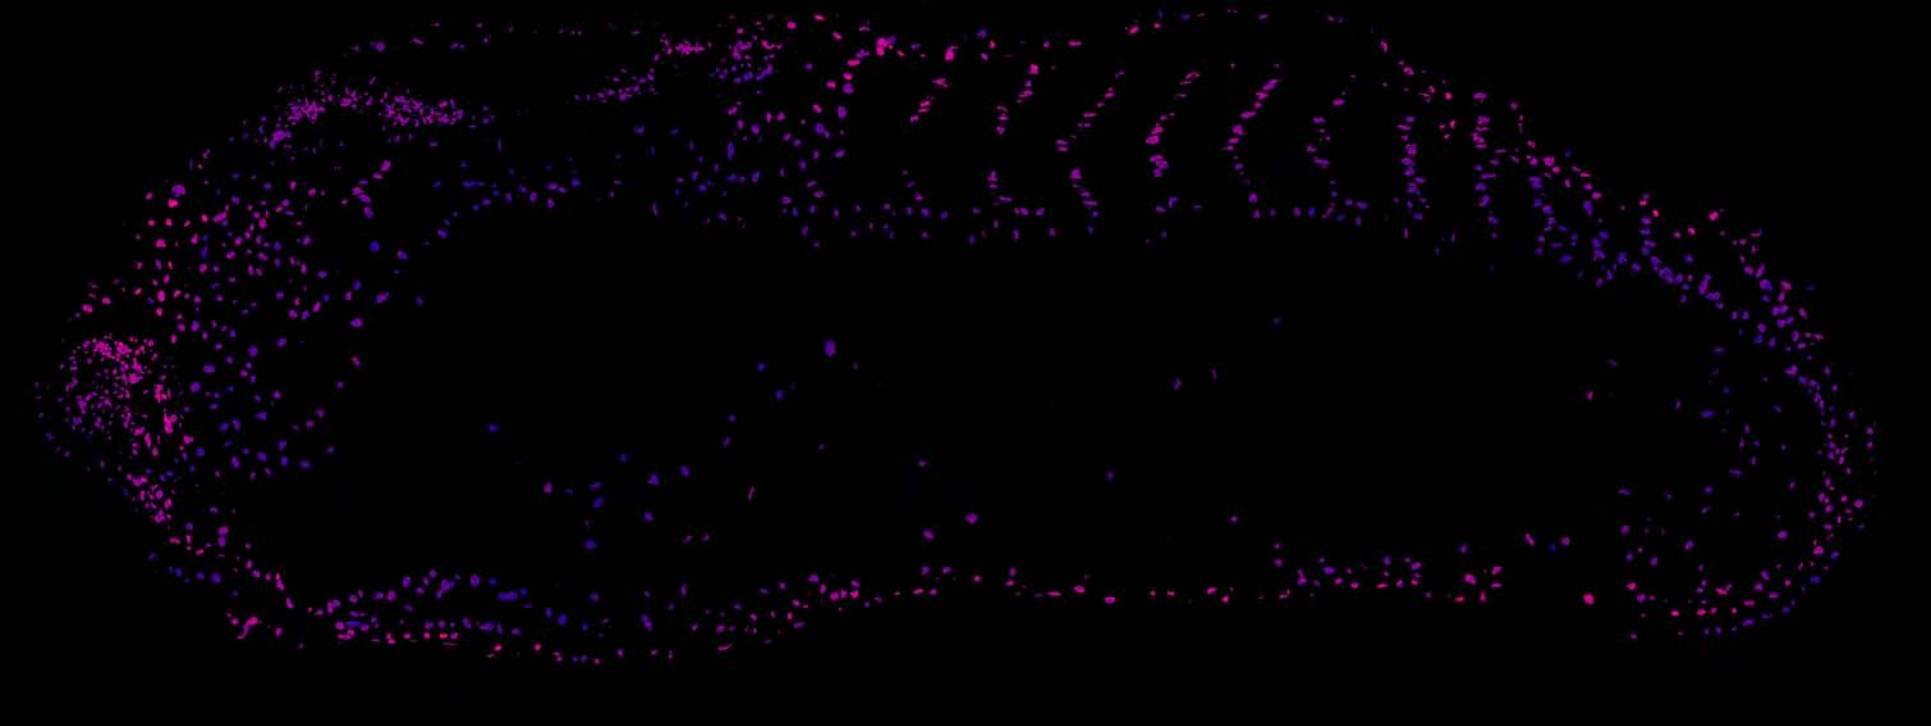

stage 26

Sagittal

$\beta$ -catenin/DAPI

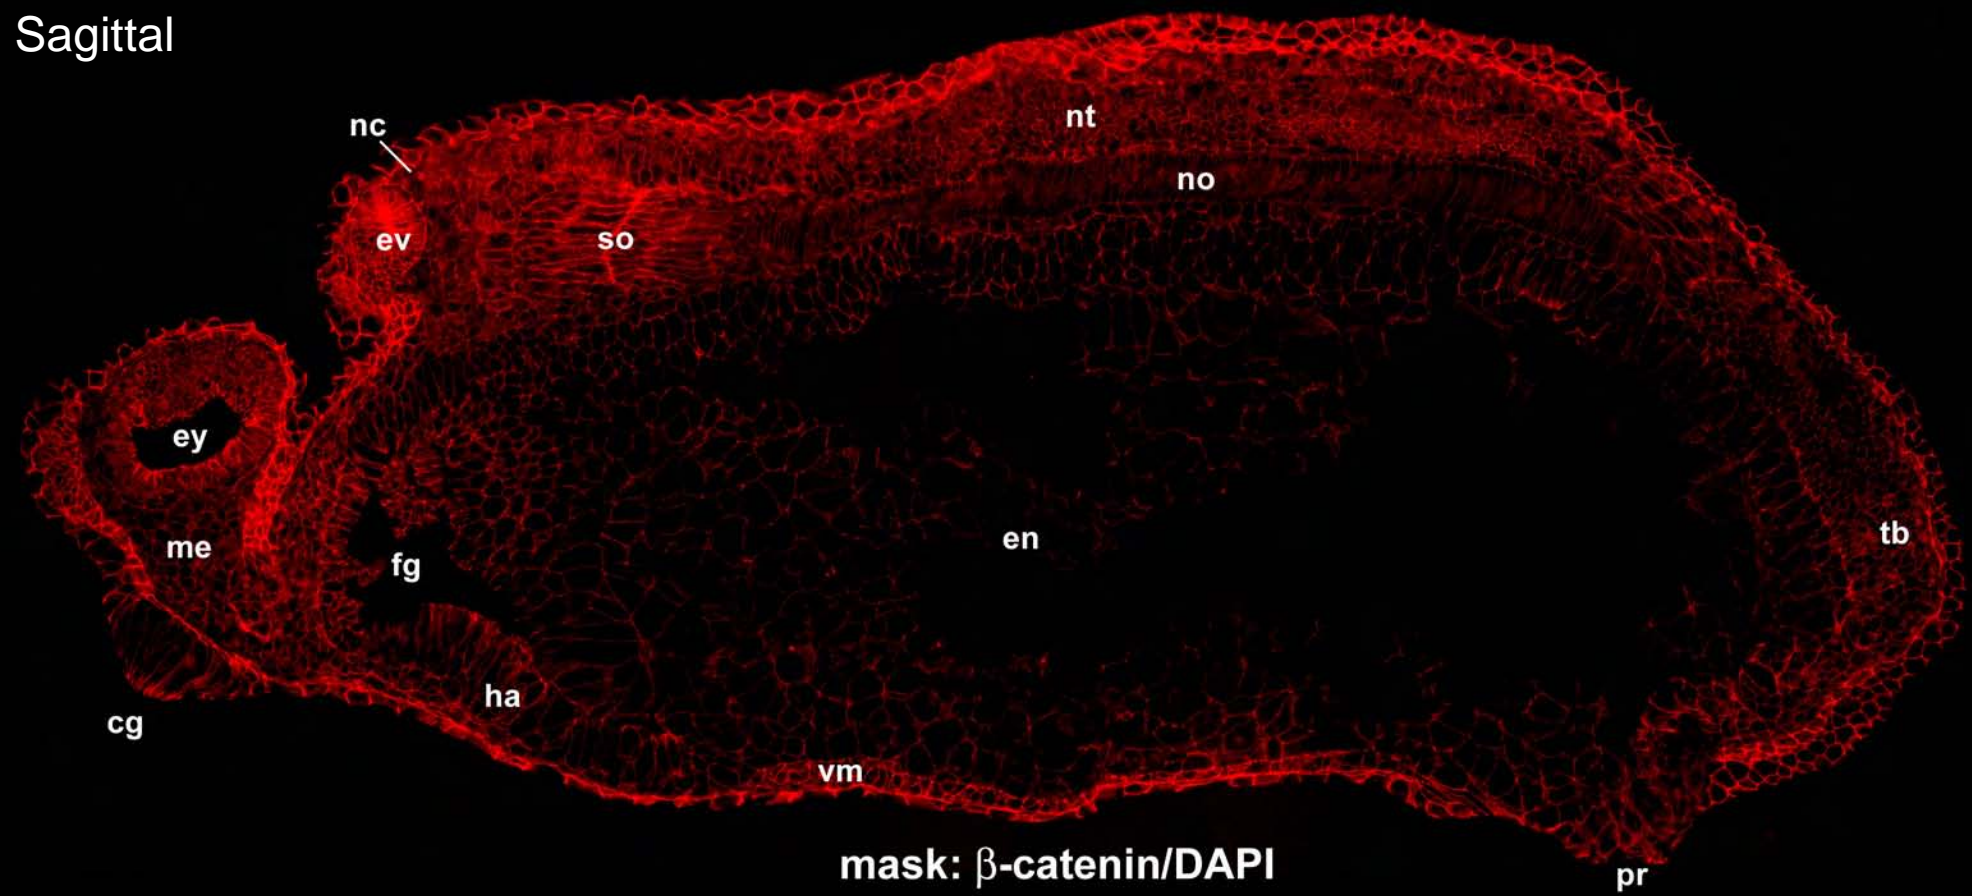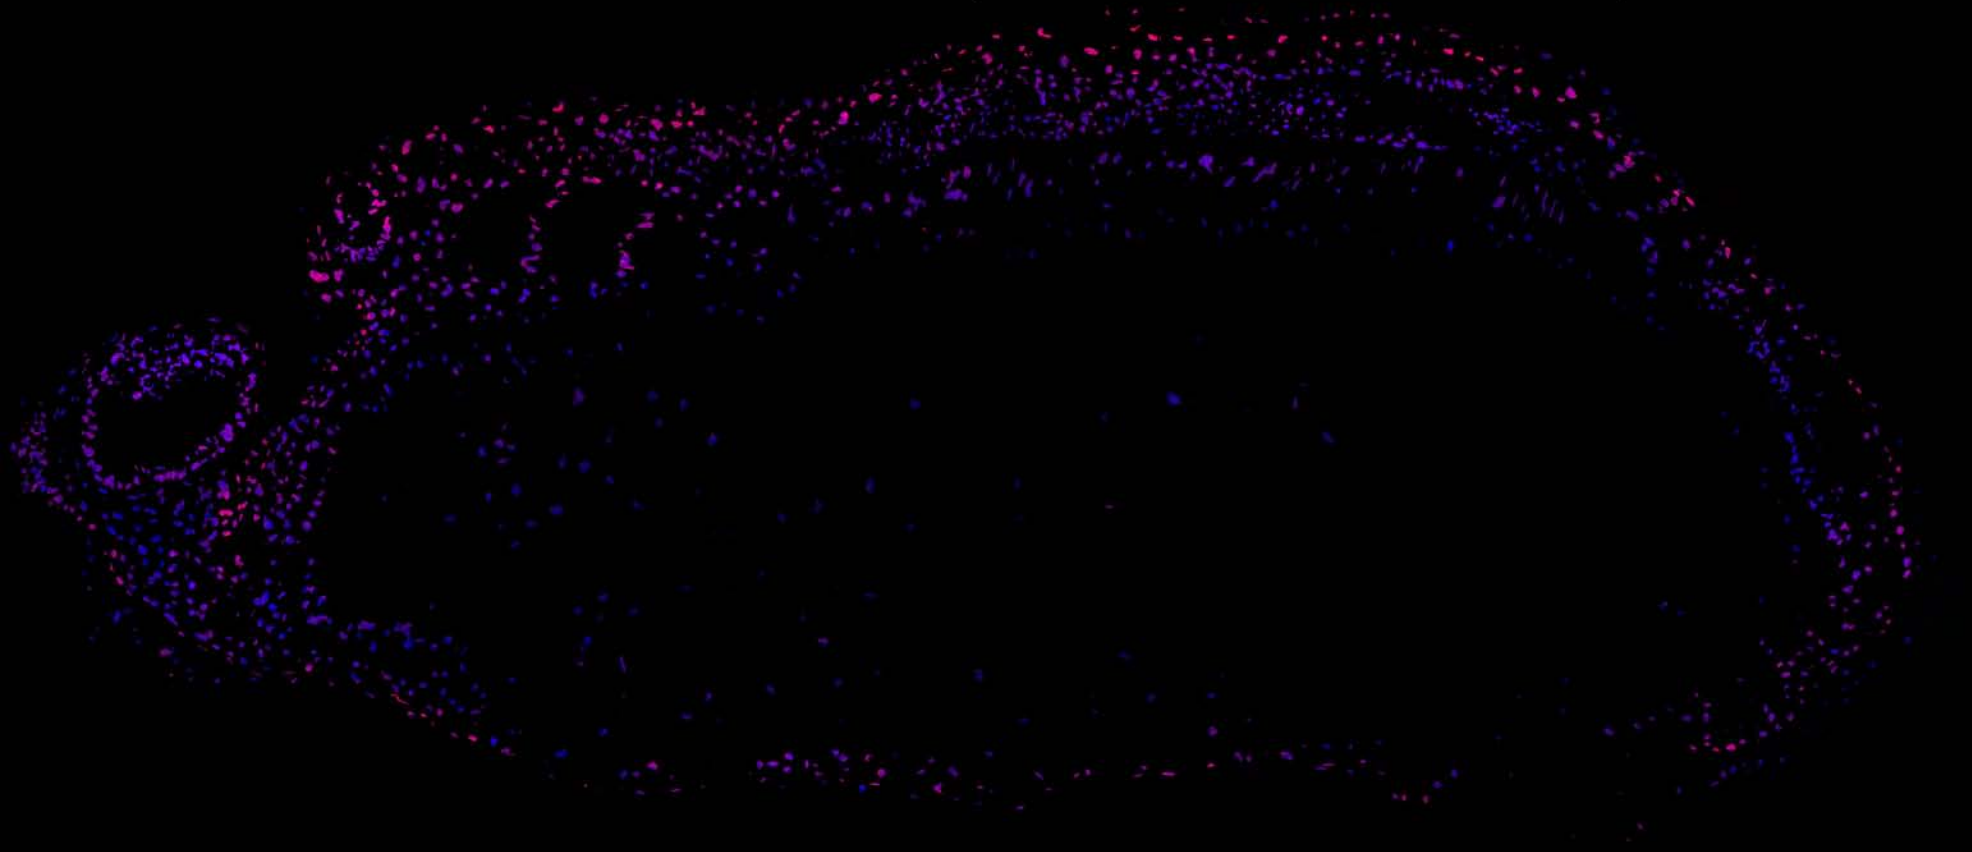



stage 26  
transversal

$\beta$ -catenin/DAPI

ANTERIOR

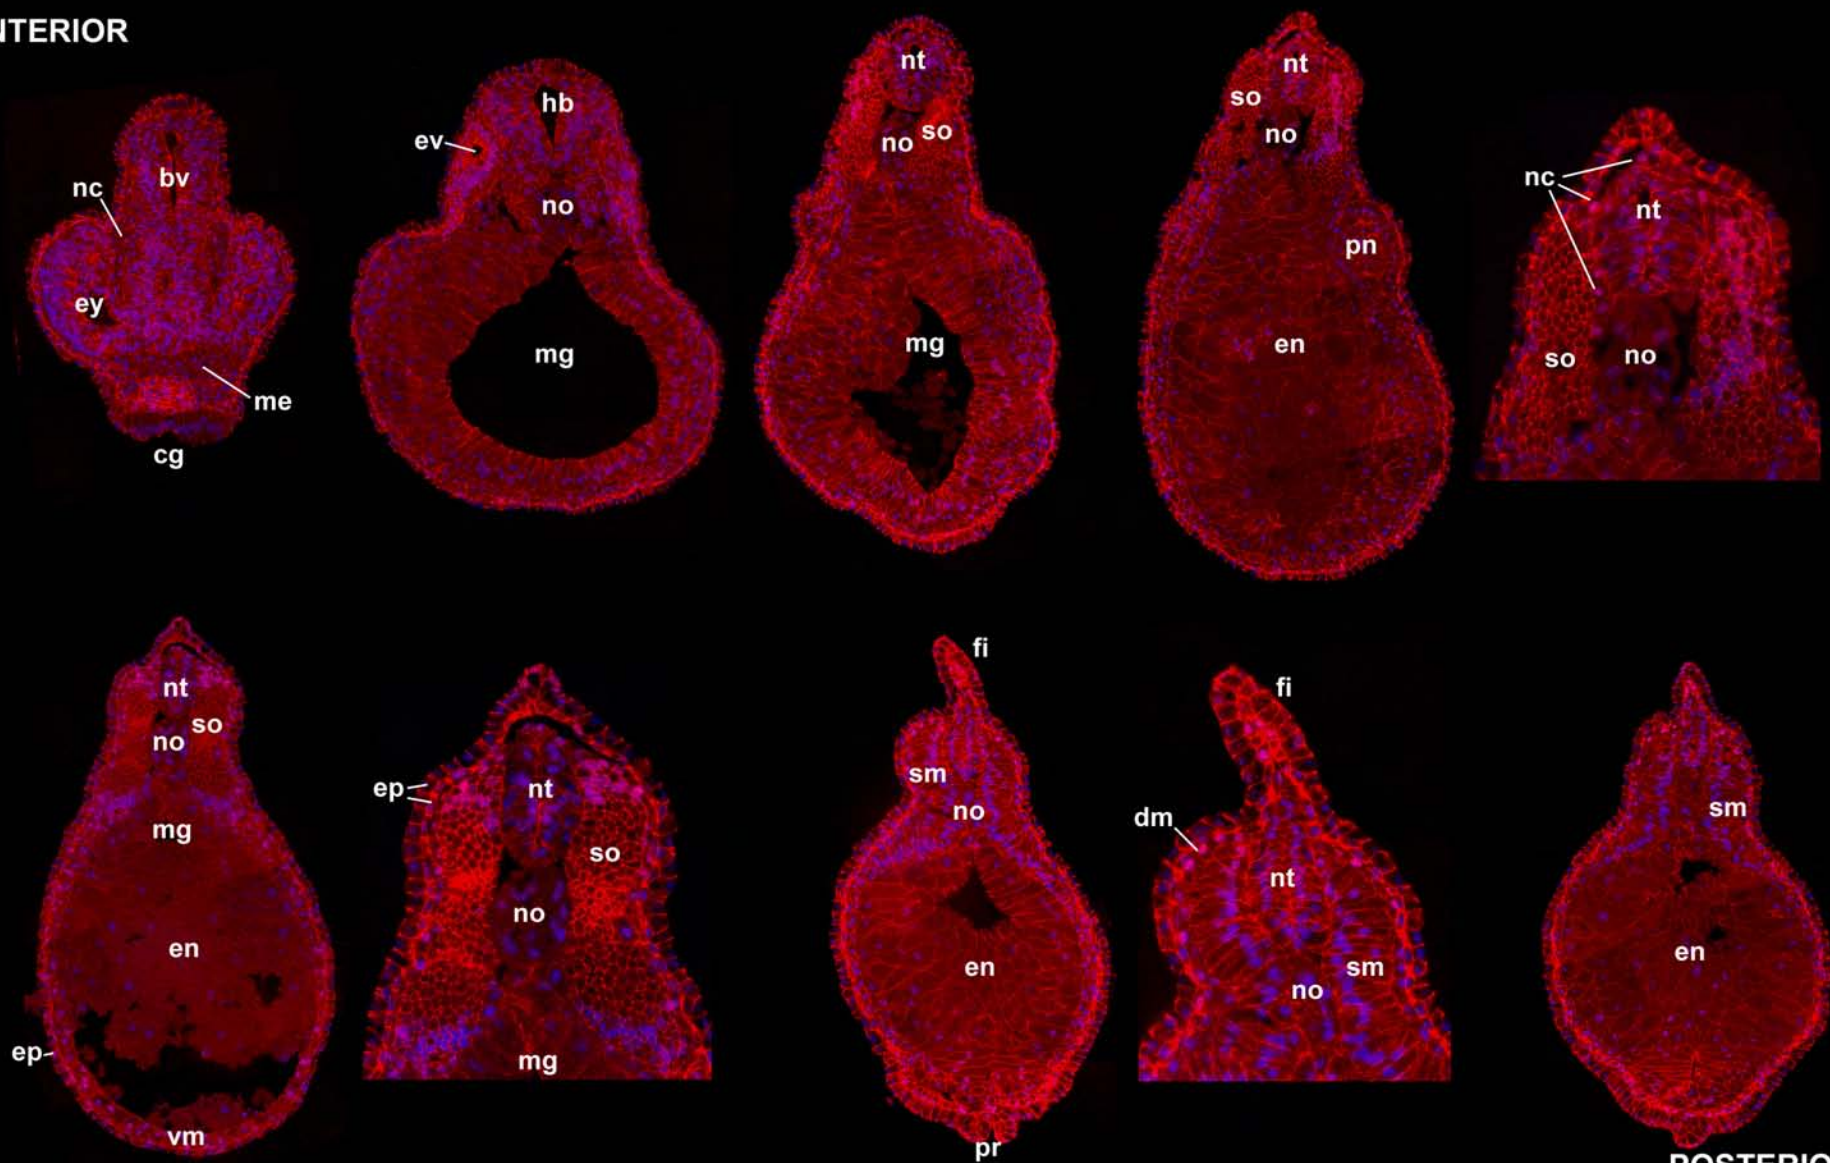

stage 31

$\beta$ -catenin/DAPI

Parasagittal

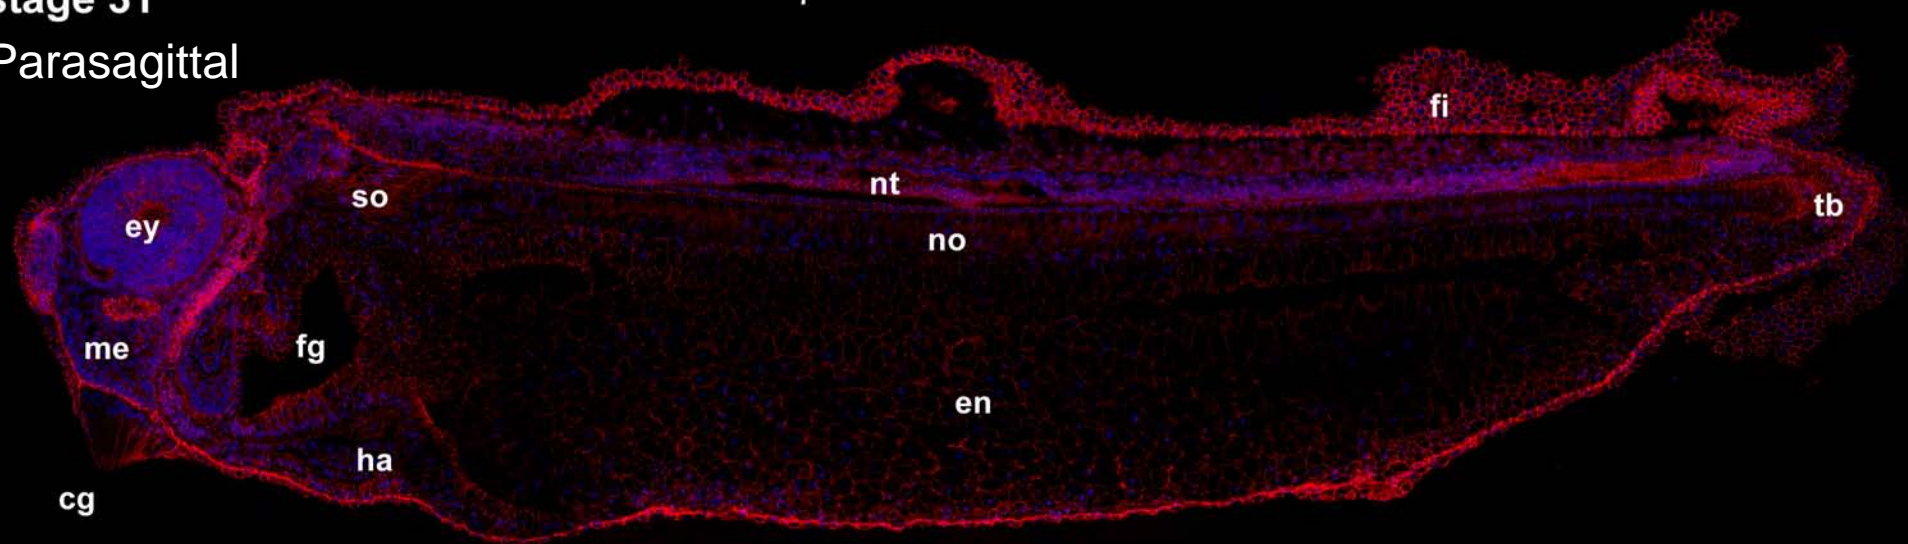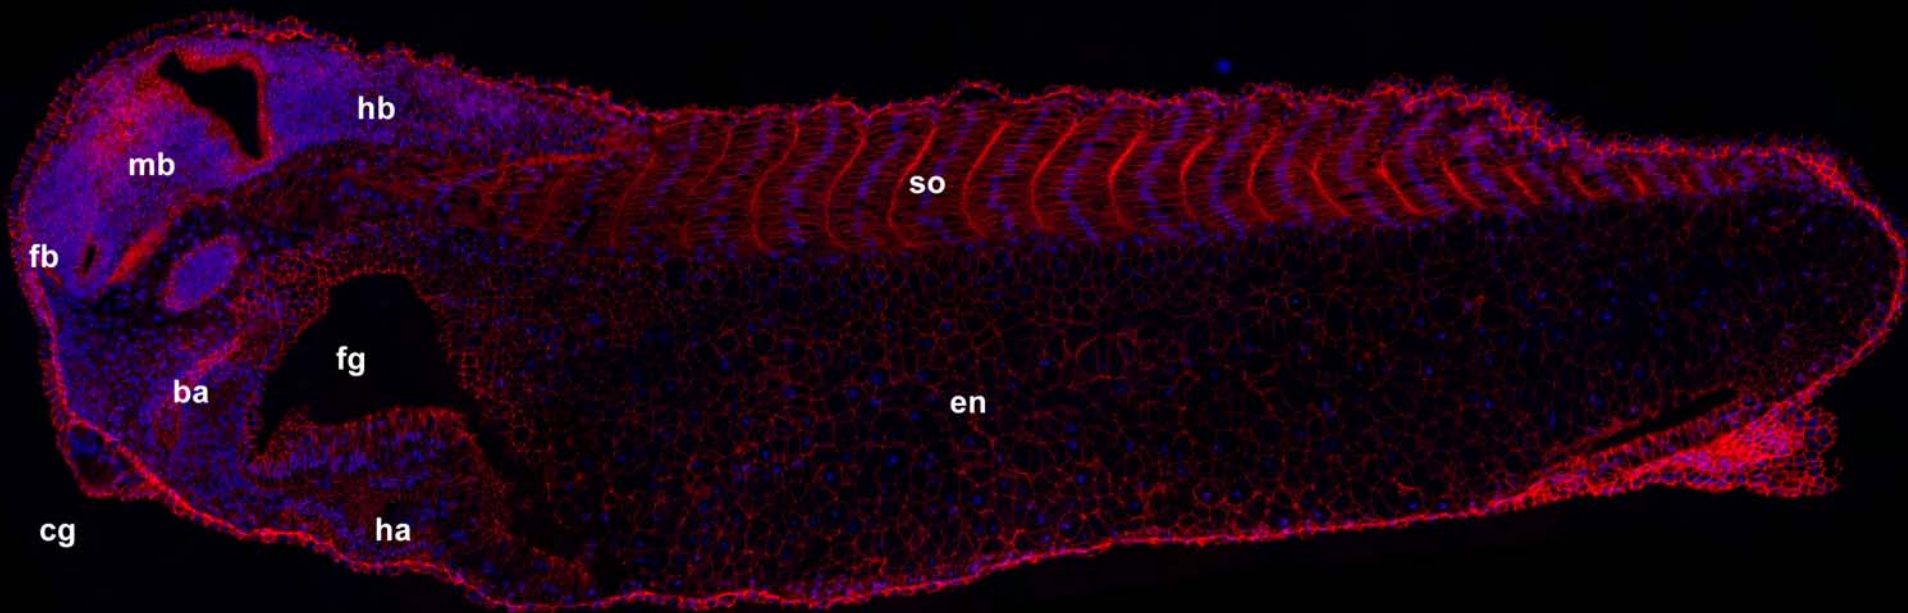

Supplement: dev129137-sup-fig2bcat.pdf [file dev129137-sup-fig2bcat.pdf]
