# Supplementary material for: β-catenin, MAPK and Smad signaling during earlyXenopusdevelopment
Source: Oxford University Press journal article supplement (doi:10.1242/dev.129.1.37), 2002-01-01

P-MAPK/Eriochrome

Mask: P-MAPK/DAPI

st8.5

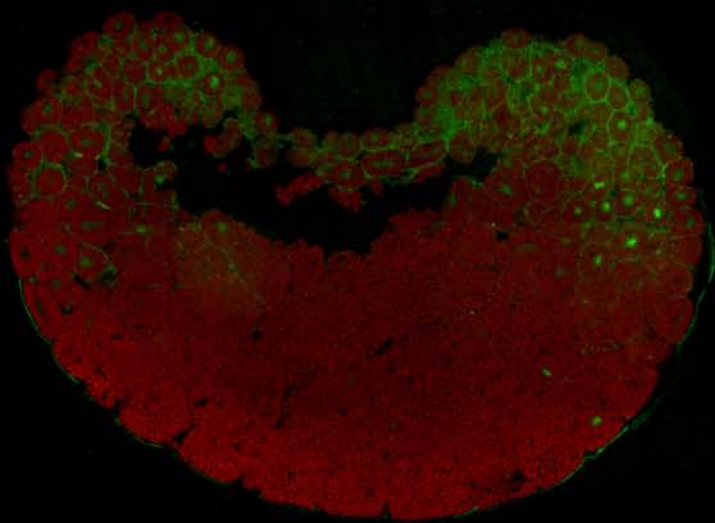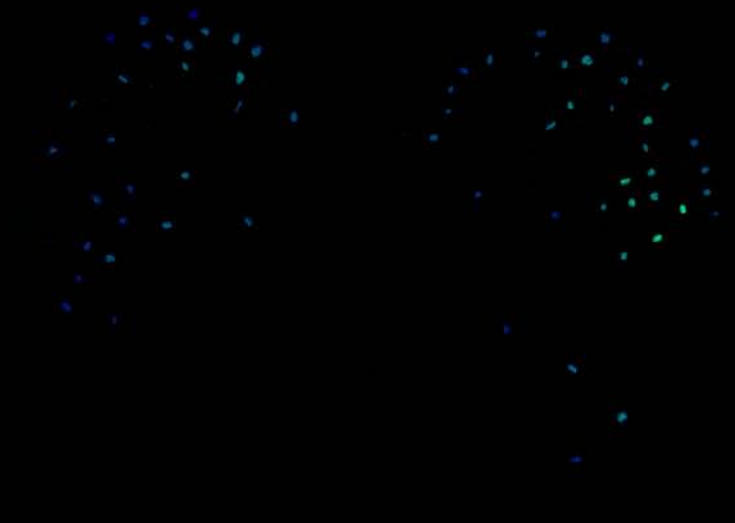

st9

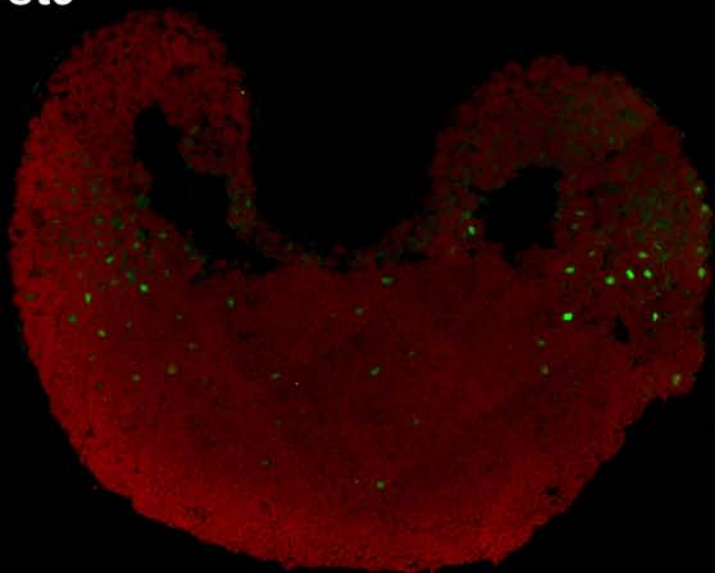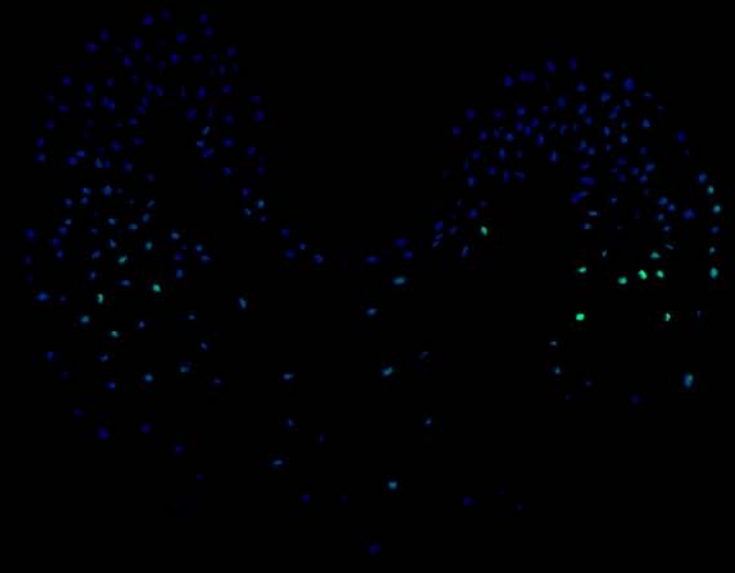

st9.5

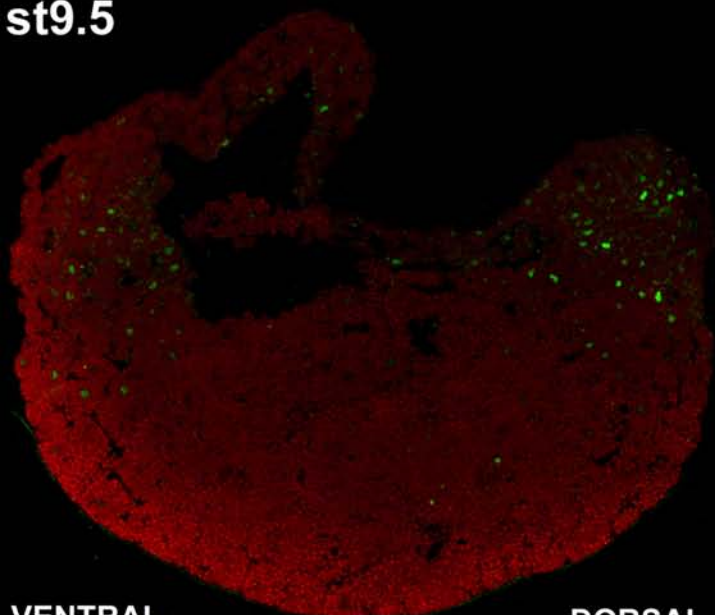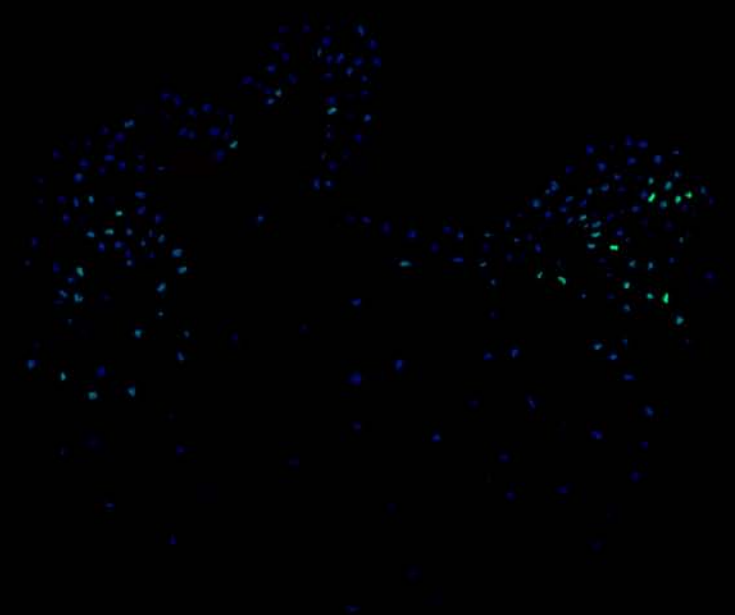

VENTRAL

DORSAL

P-MAPK/Eriochrome

Mask: P-MAPK/DAPI

st10.25

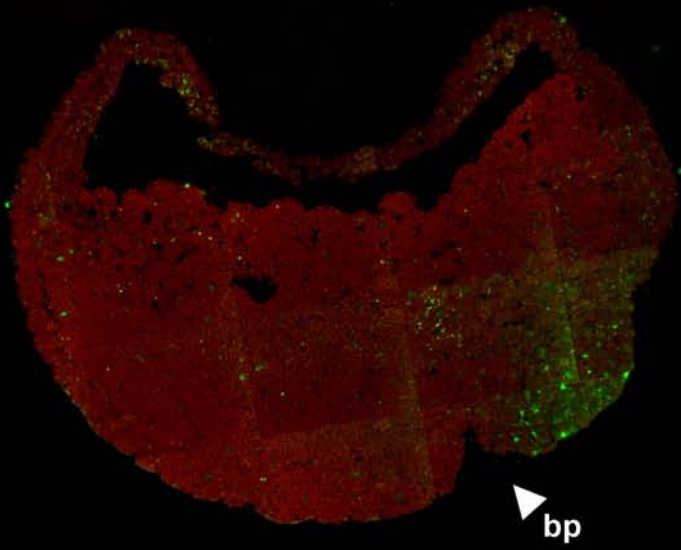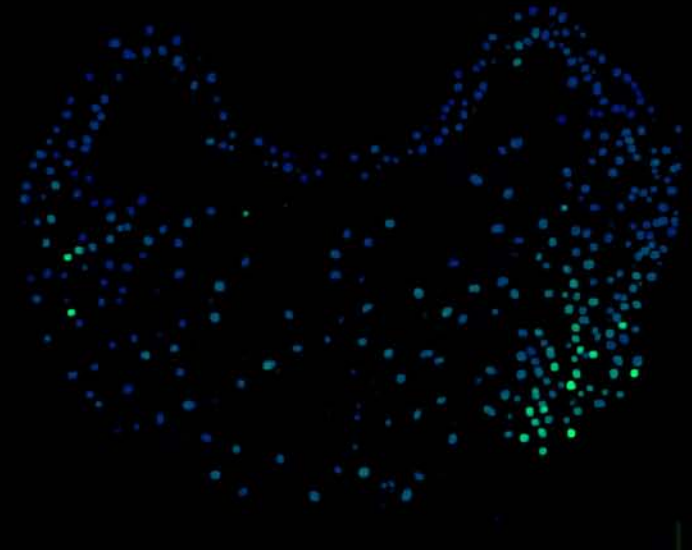

st11

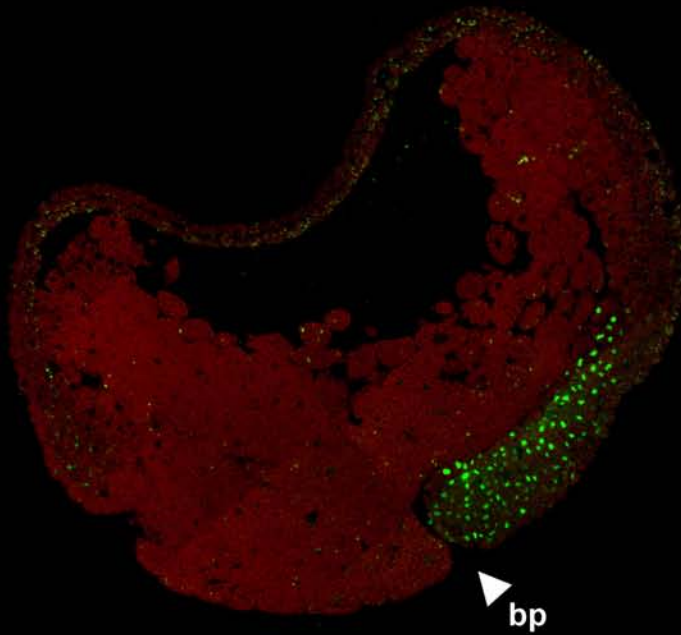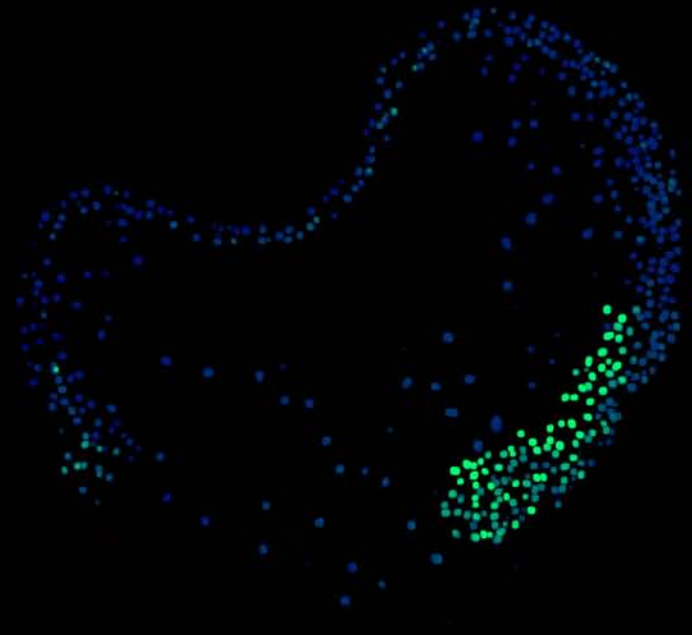

st12

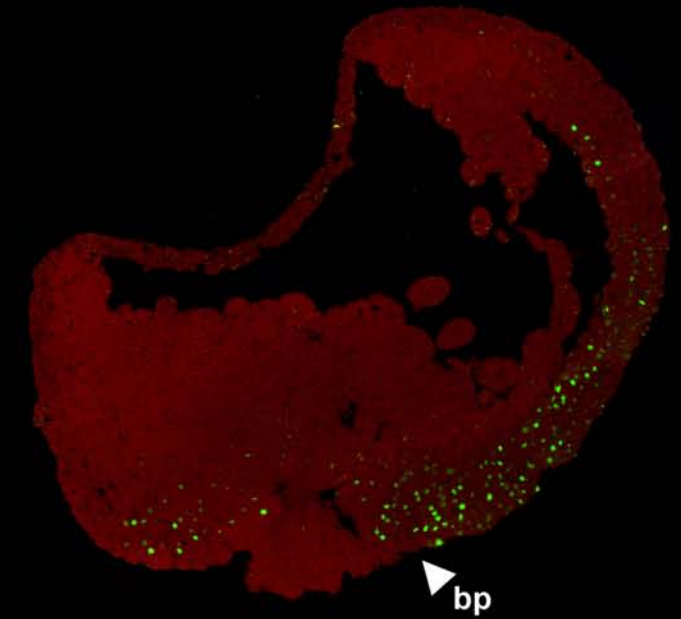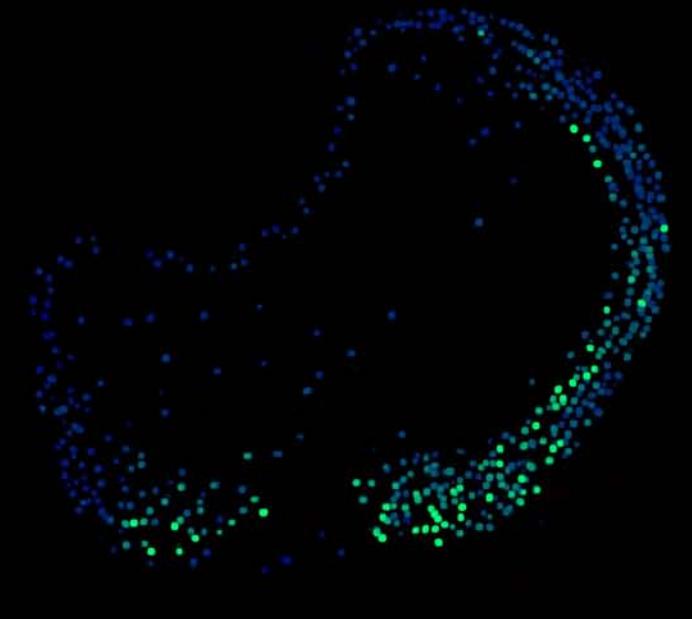

**P-MAPK/Eriochrome**

**Mask: P-MAPK/DAPI**

**st13**

**ANT**

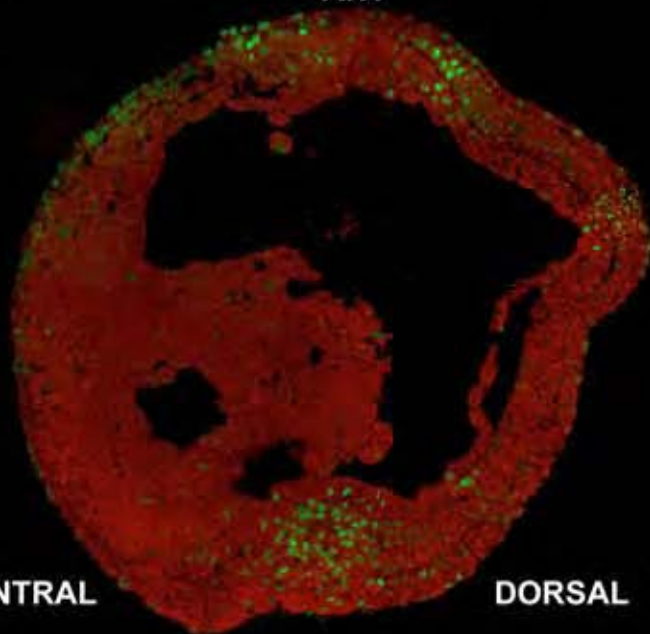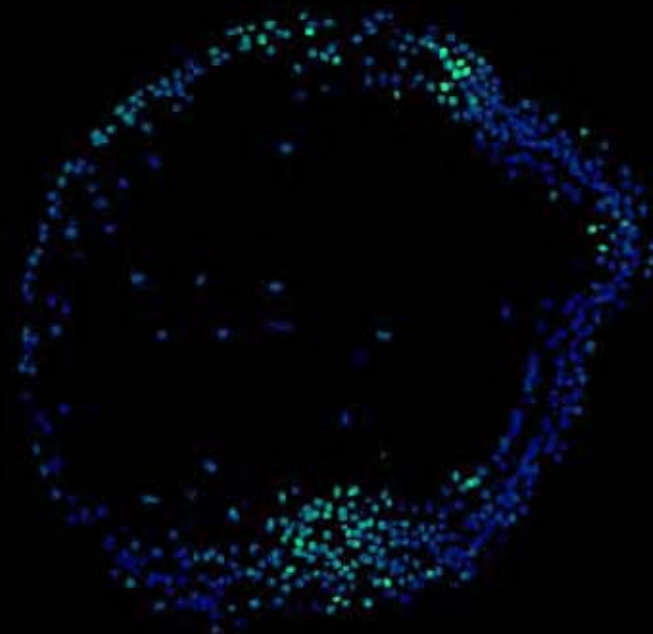

**VENTRAL**

**DORSAL**

**st16**

**Parasagittal**

**DORSAL**

**np**

**so**

**en**

**hb**

**mb**

**fb**

**cc**

**ANT**

**en**

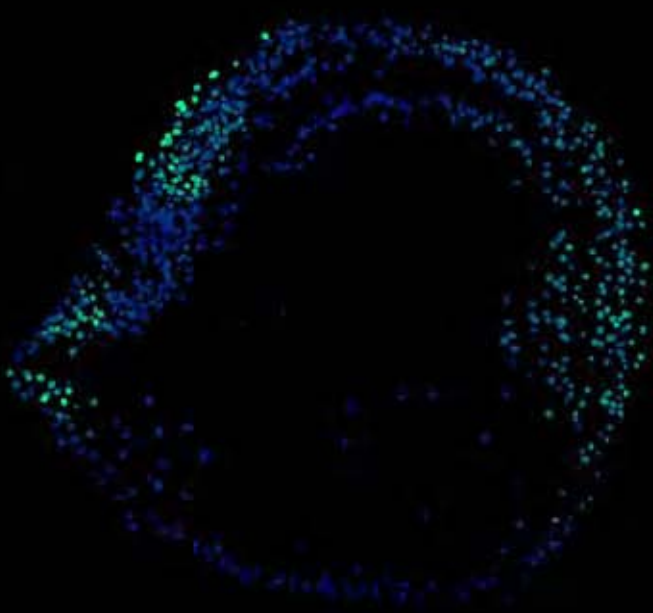

**st16**

**Transverse**

**np**

**no**

**so**

**ac**

**en**

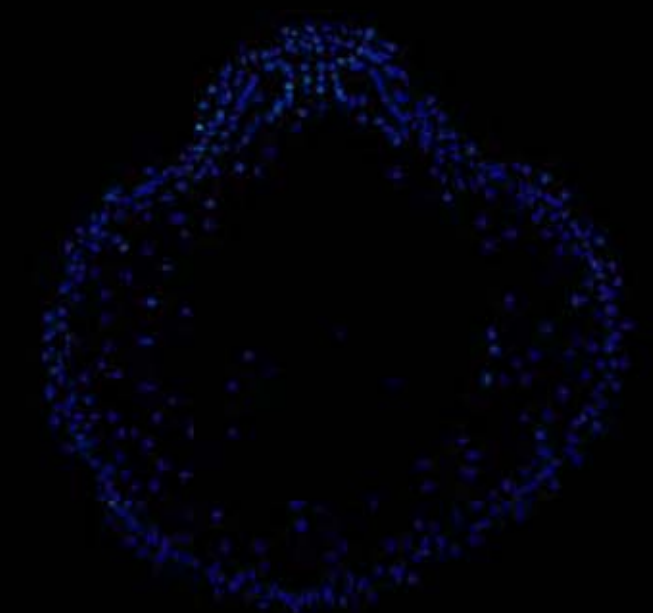



**P-MAPK/Eriochrome**

**Mask: P-MAPK/DAPI**

**stage 23  
sagittal**

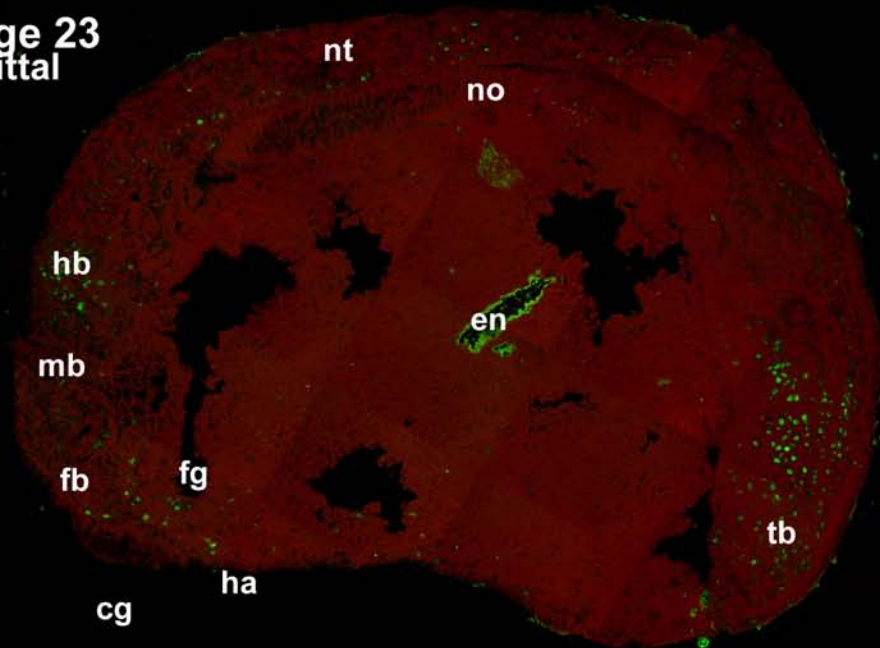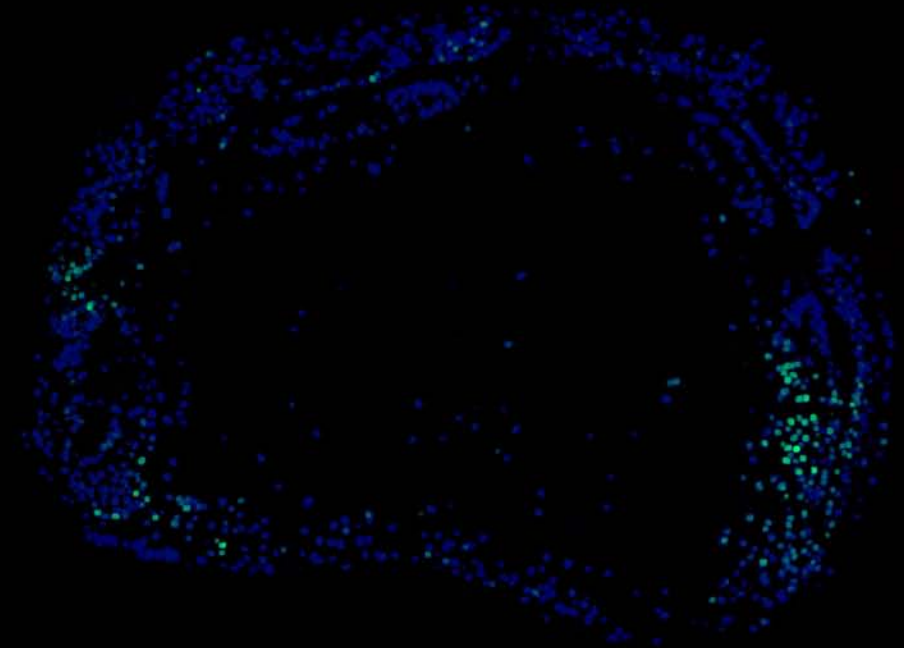

**stage 23  
parasagittal**

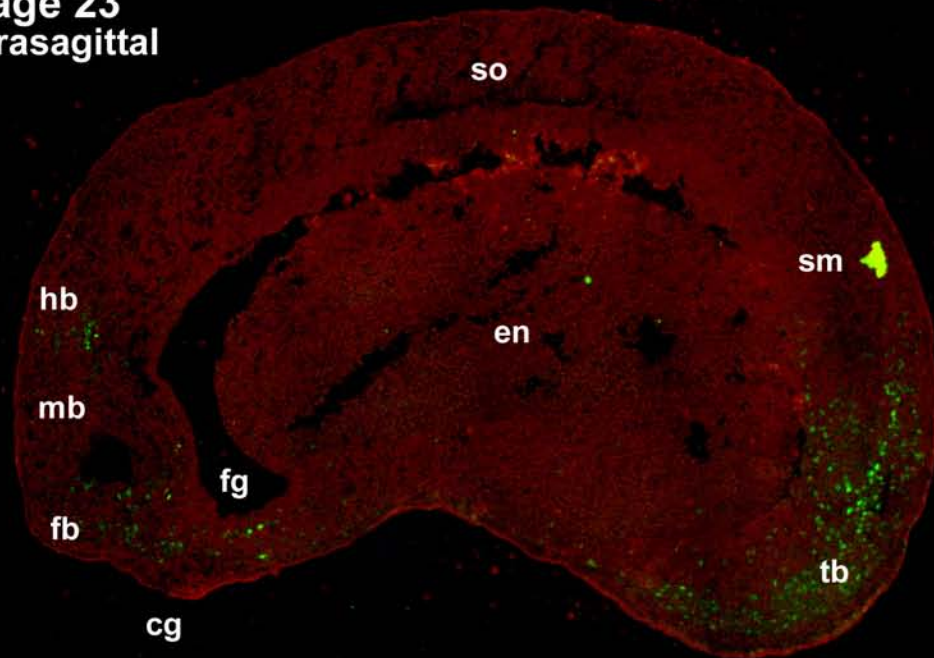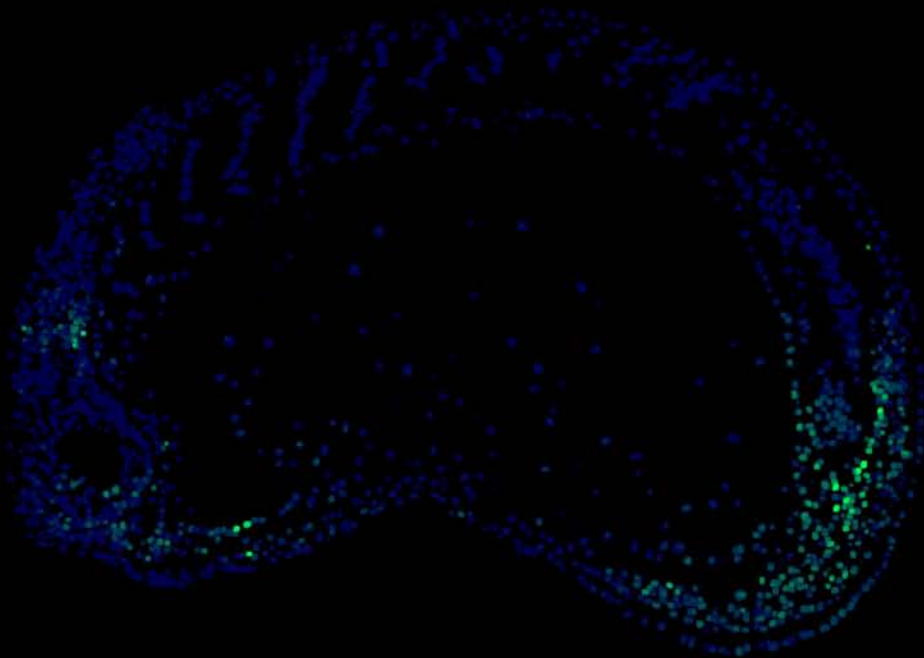

Sagittal

stage 26, notochord

P-Smad2/P-MAPK

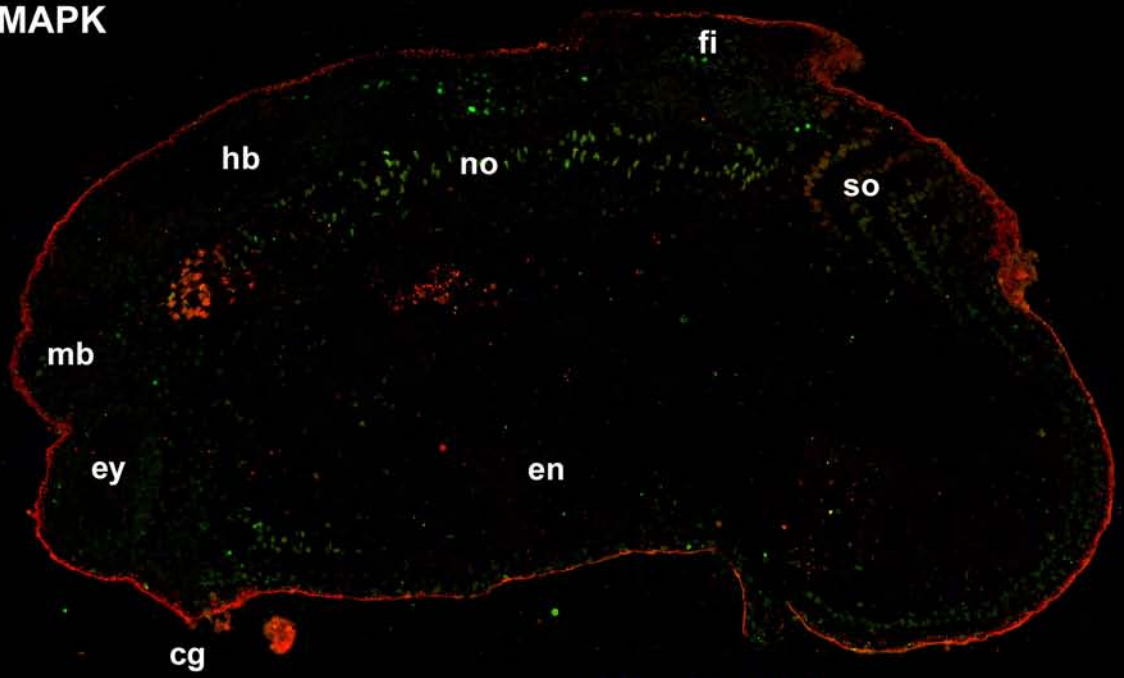

mask:P-Smad2/DAPI

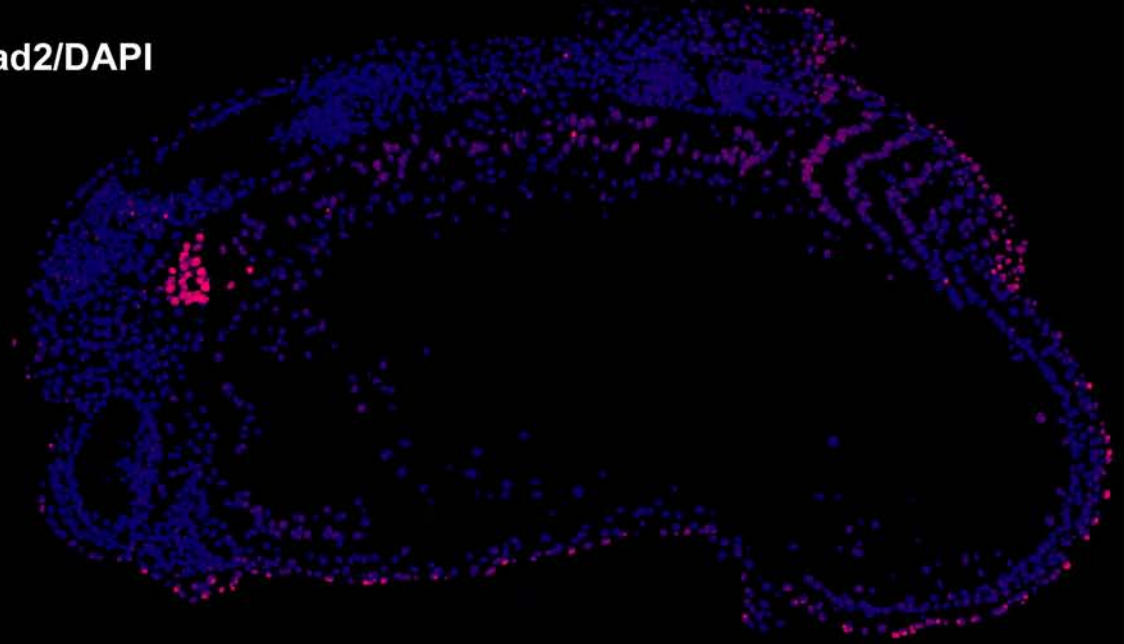

mask: P-MAPK/DAPI

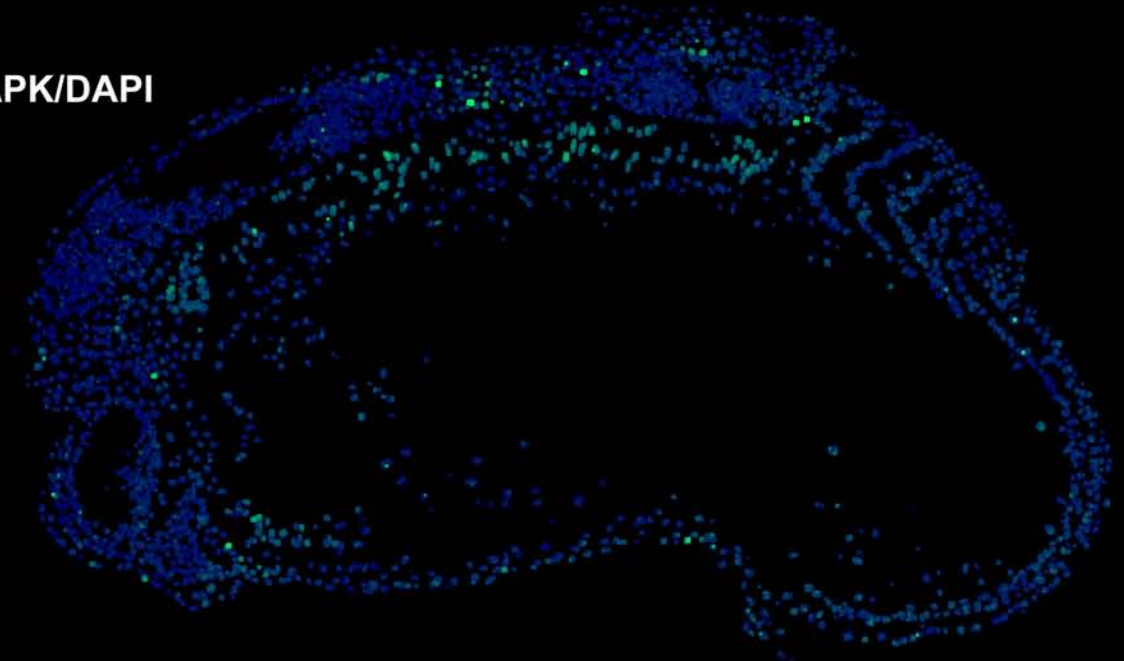

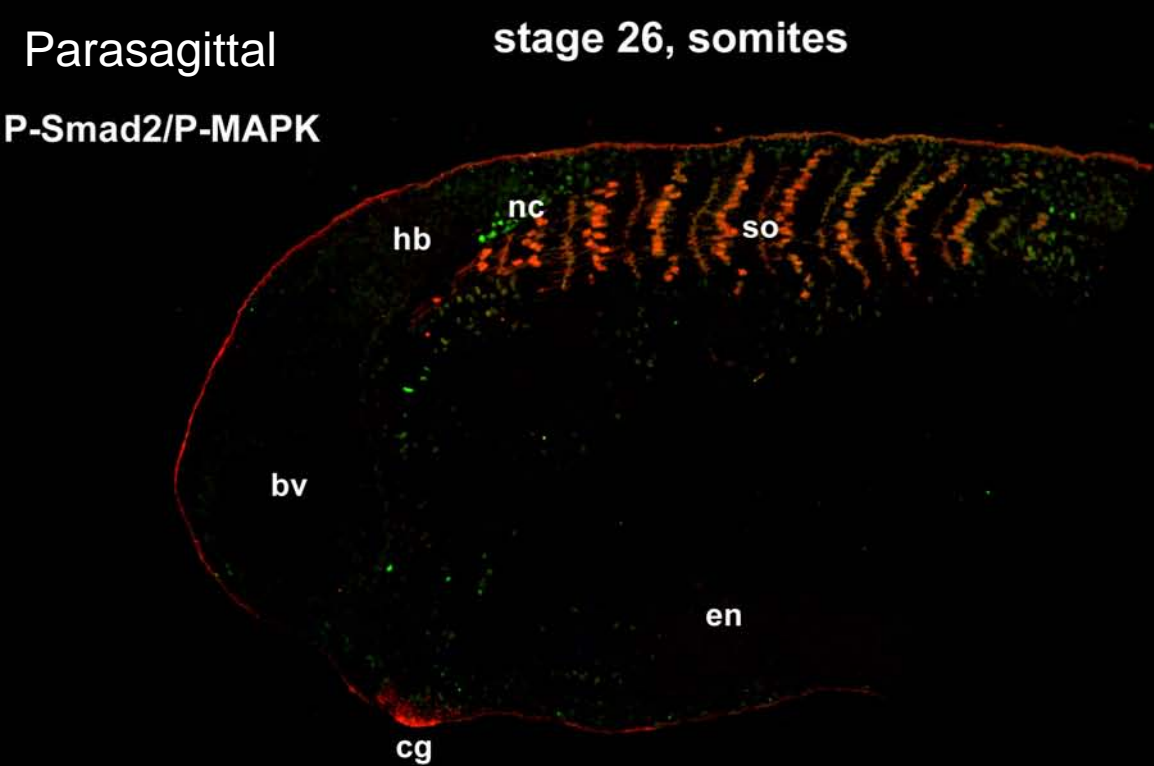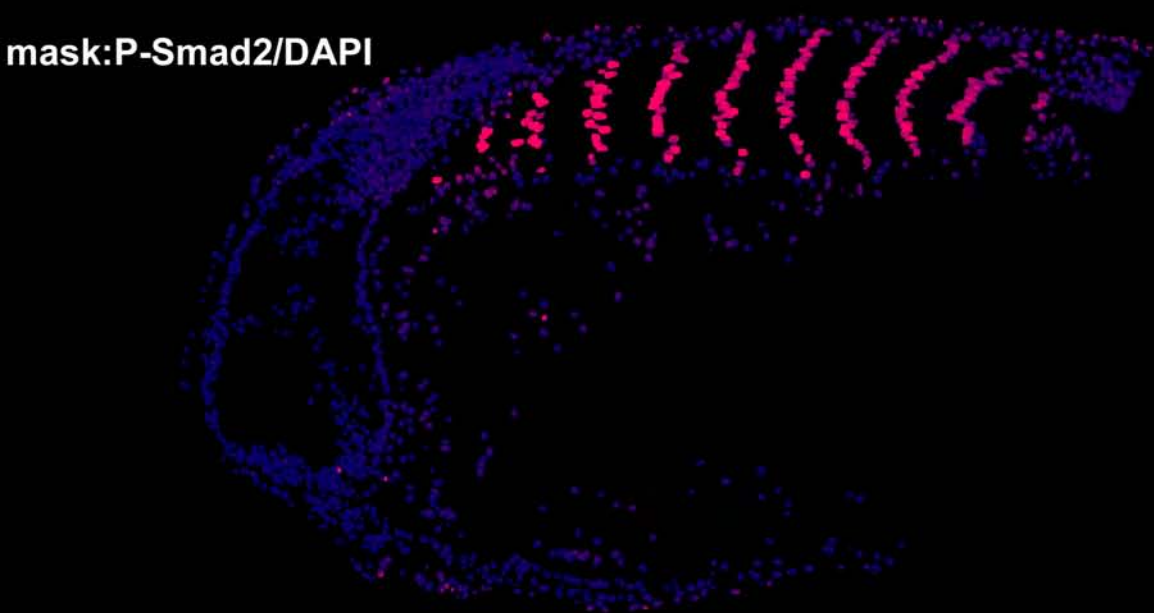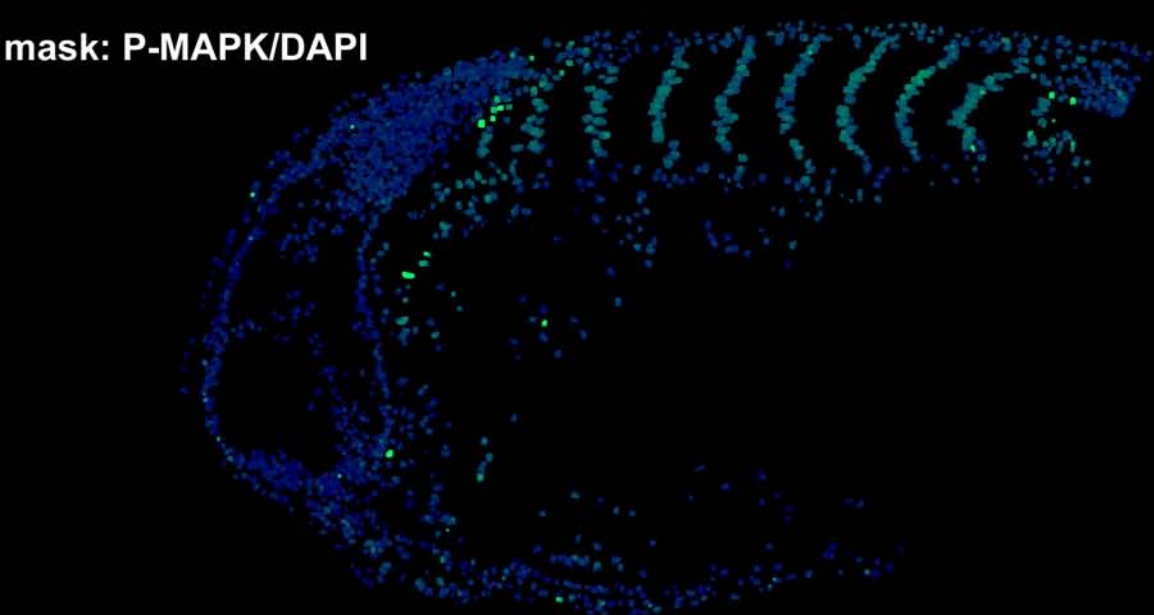



Sagittal

stage 31, notochord

P-Smad2/P-MAPK

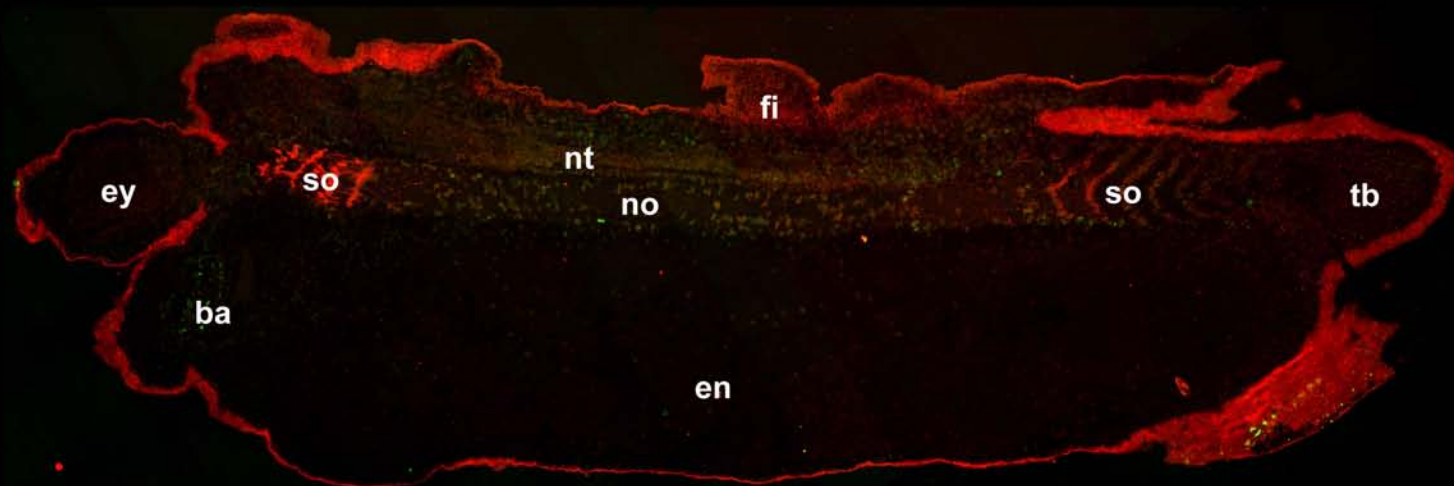

mask: P-Samd2/DAPI

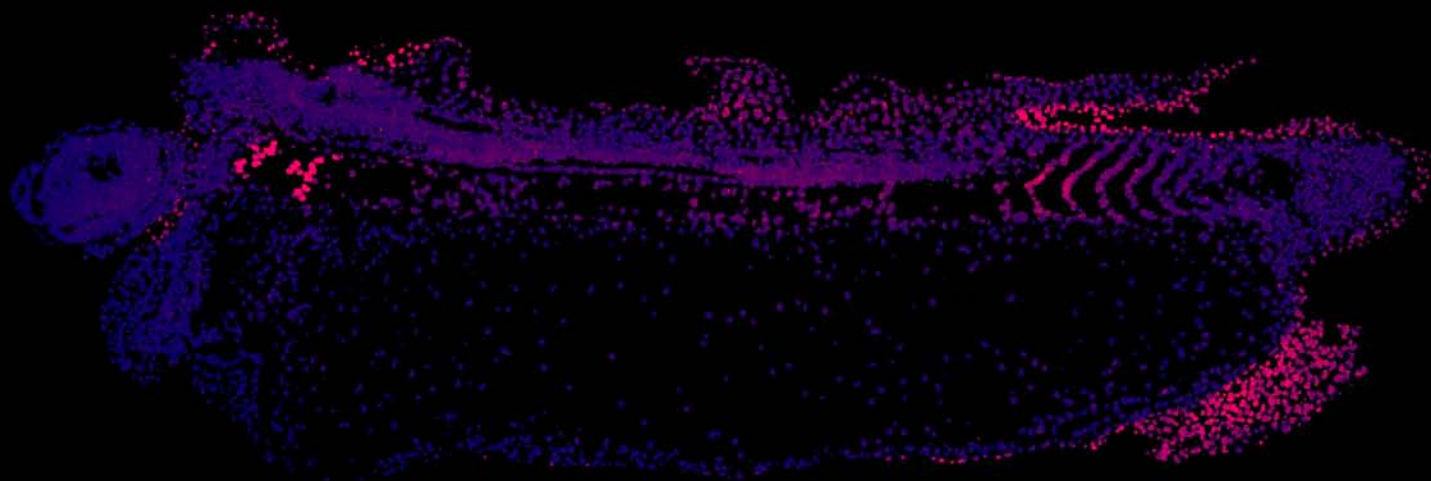

mask: P-MAPK/DAPI

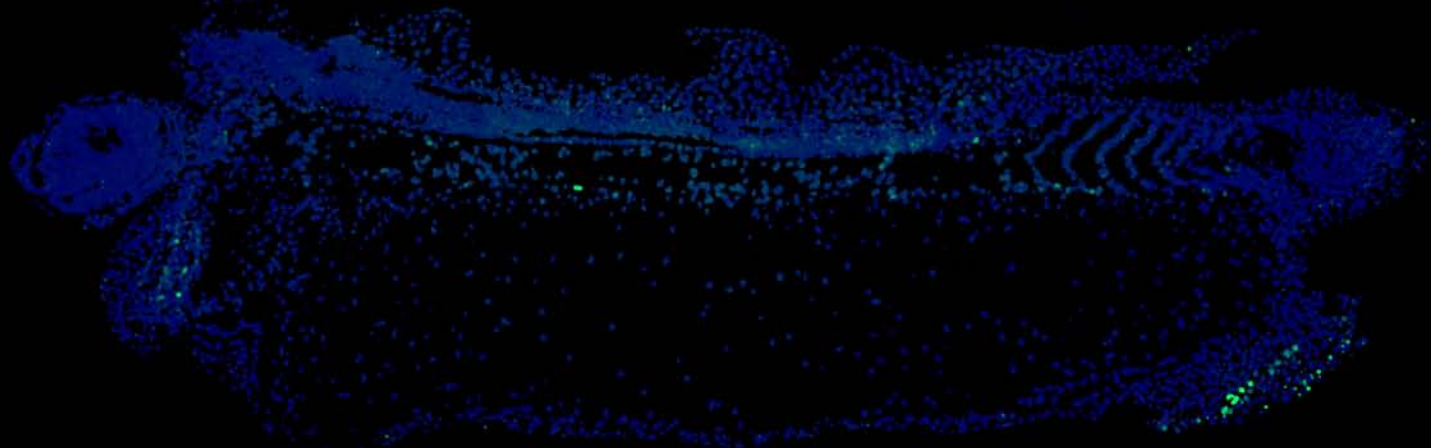

Parasagittal

stage 31, somites

P-Smad2/P-MAPK

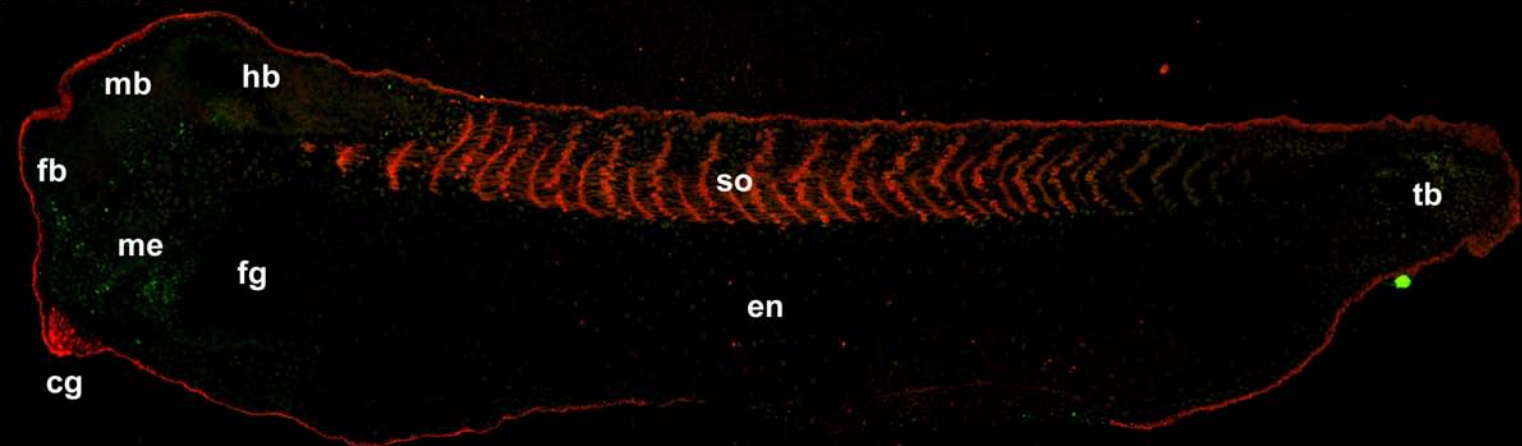

mask: P-Smad2/DAPI

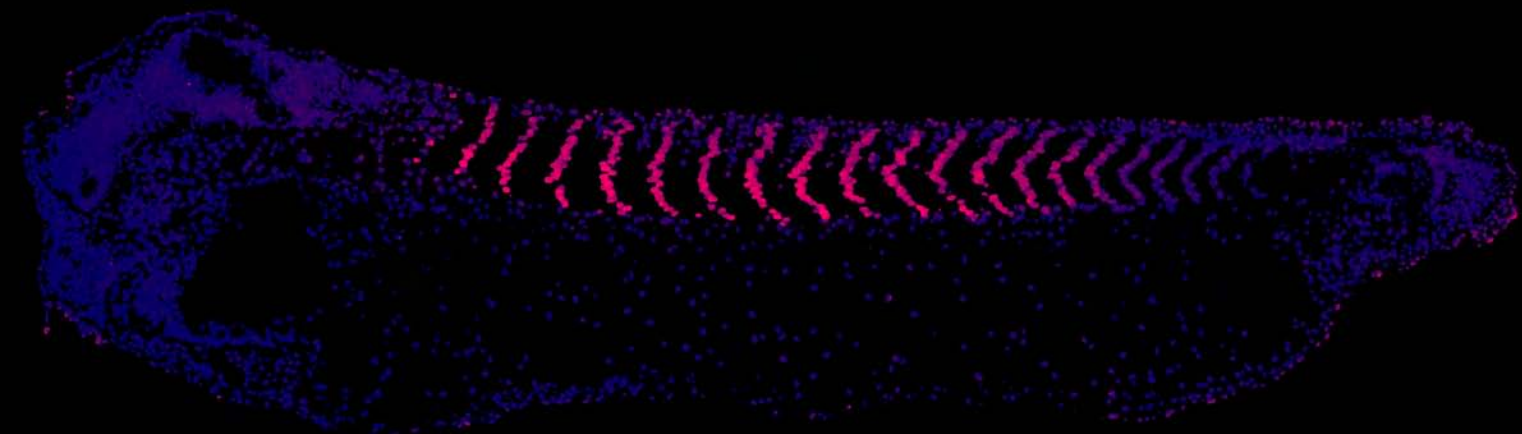

mask: P-MAPK/DAPI

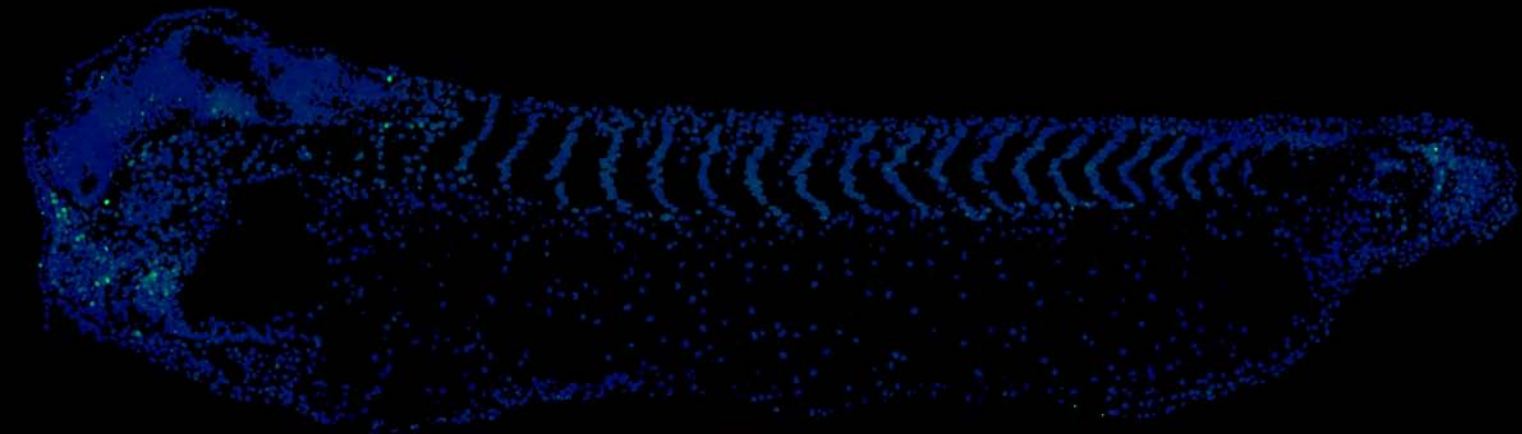



Parasagittal stage 31

P-Smad2/P-MAPK

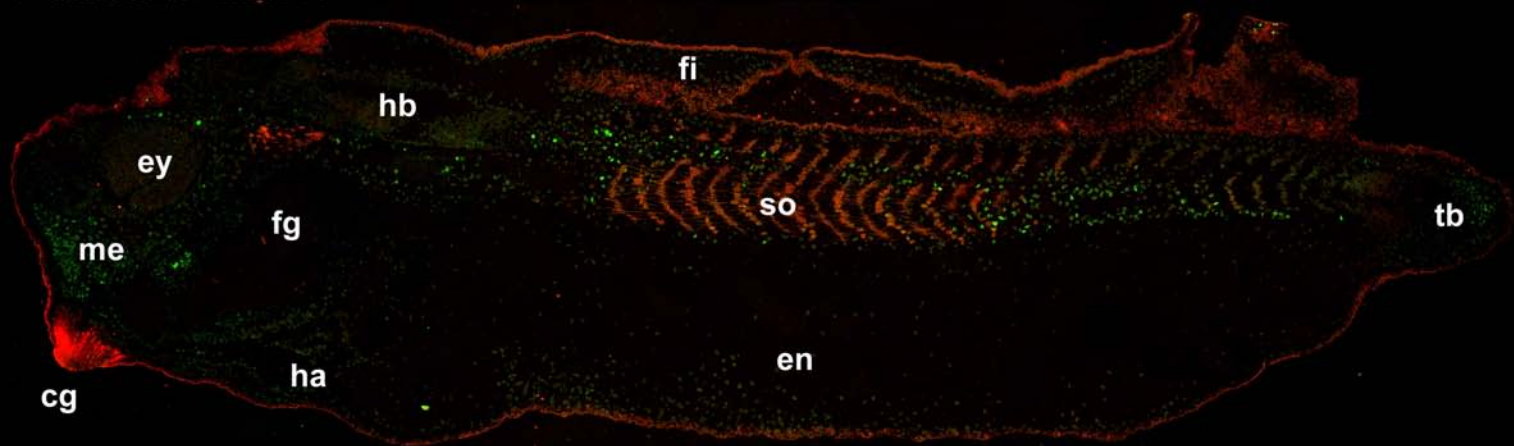

mask: P-Smad2/DAPI

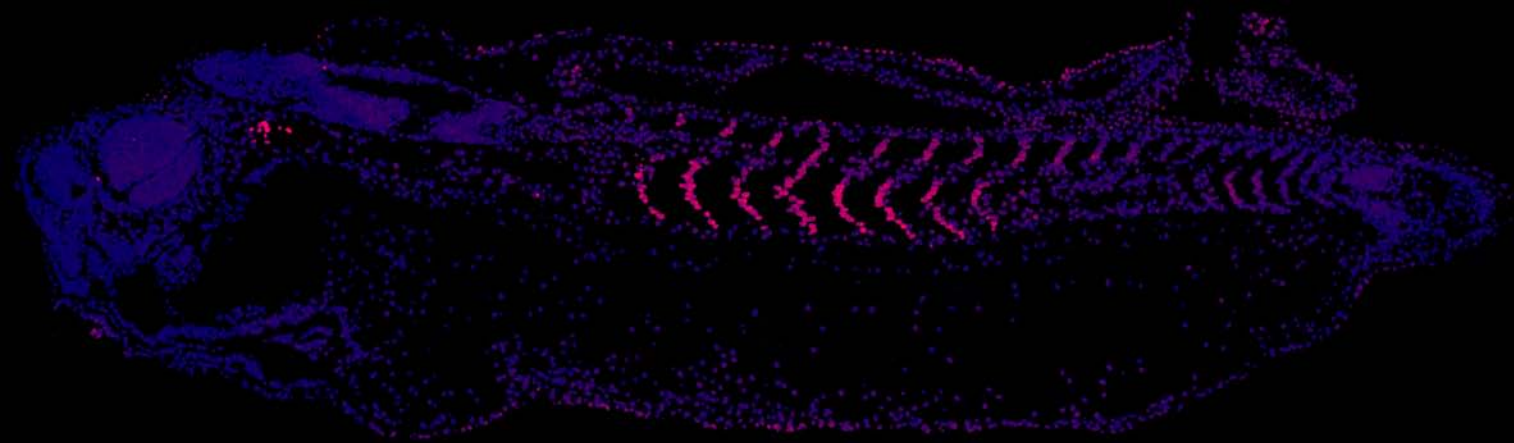

mask: P-MAPK/DAPI

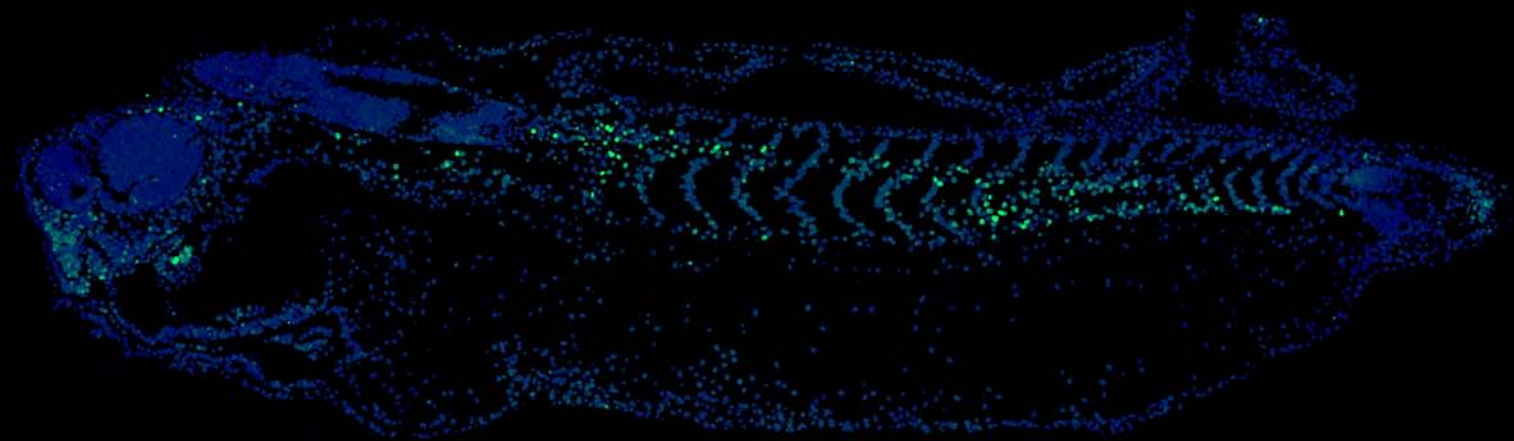

stage 31, head

P-Smad2/P-MAPK

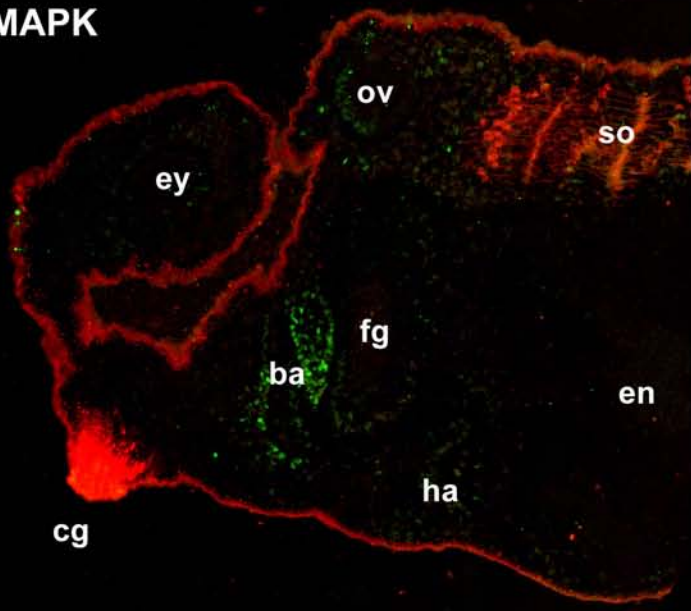

mask: P-Smad2/DAPI

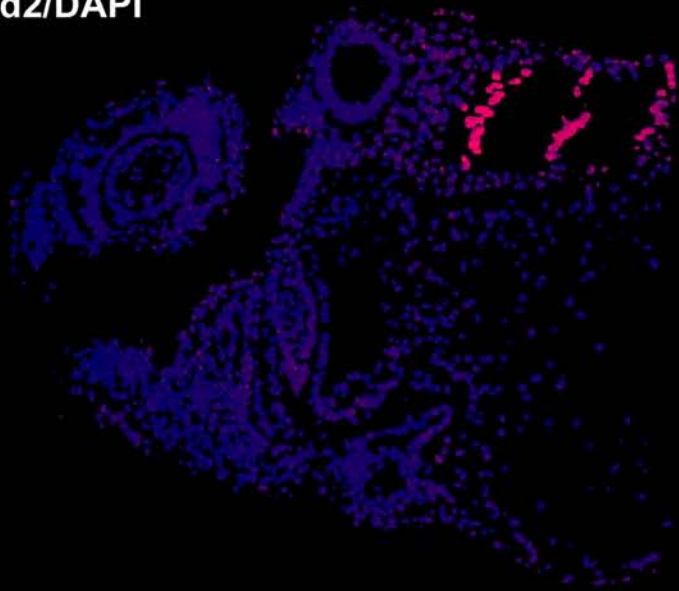

mask: P-MAPK/DAPI

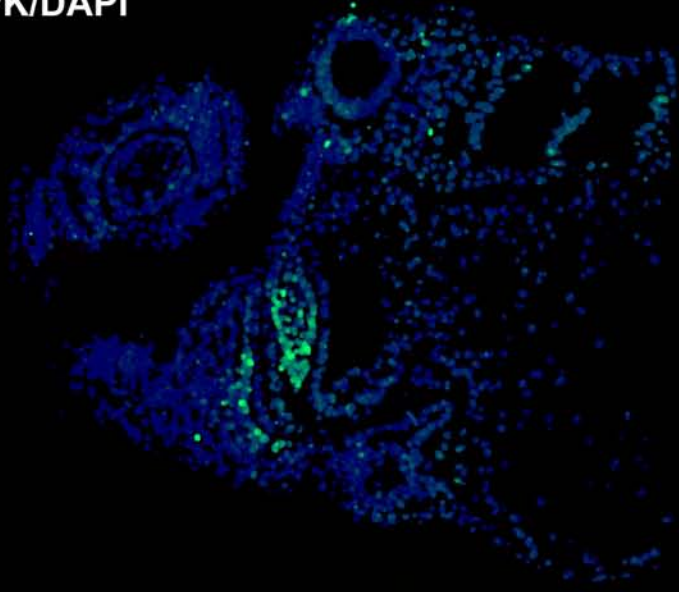

Supplement: dev129137-sup-fig2mapk.pdf [file dev129137-sup-fig2mapk.pdf]
