# Supplementary material for: β-catenin, MAPK and Smad signaling during earlyXenopusdevelopment
Source: Oxford University Press journal article supplement (doi:10.1242/dev.129.1.37), 2002-01-01

P-Smad1/Eriochrome

mask: P-Smad1/DAPI

detail

stage 8.5

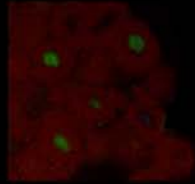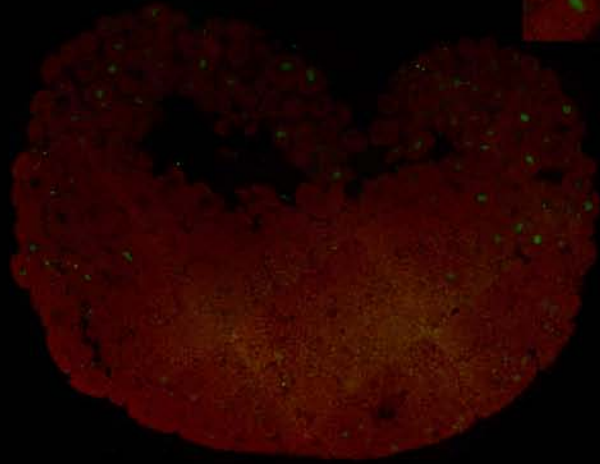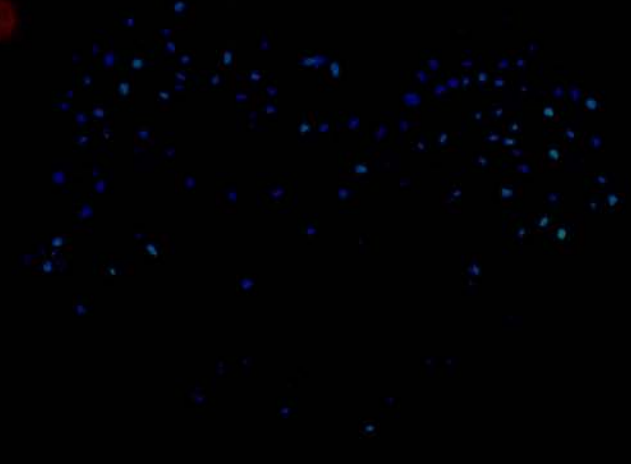

stage 9

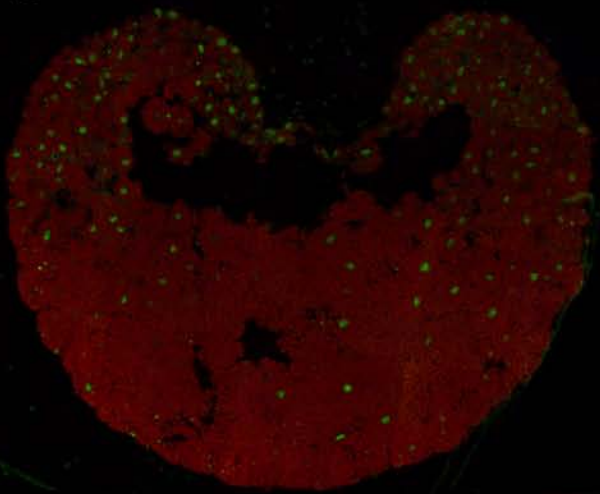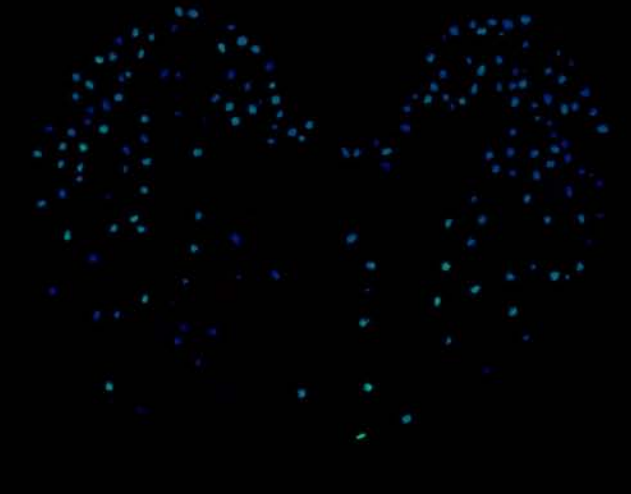

stage 9.5

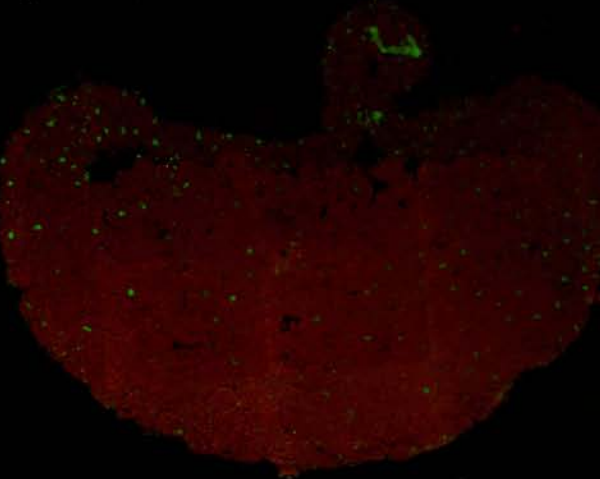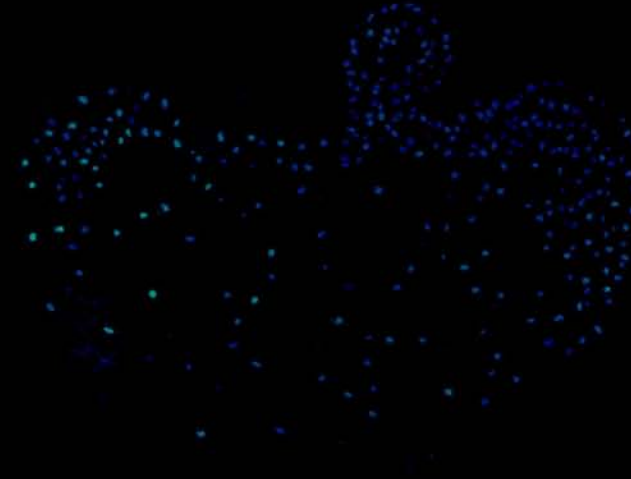

P-Smad1/Eriochrome

mask: P-Smad1/DAPI

stage 10.25

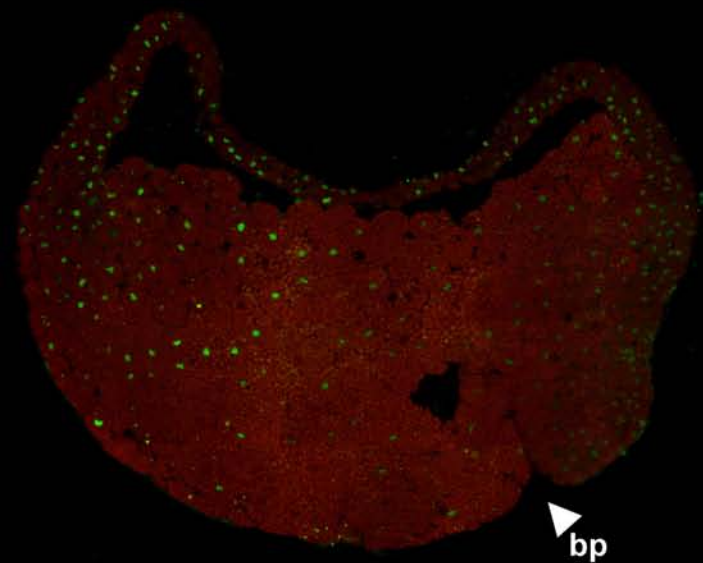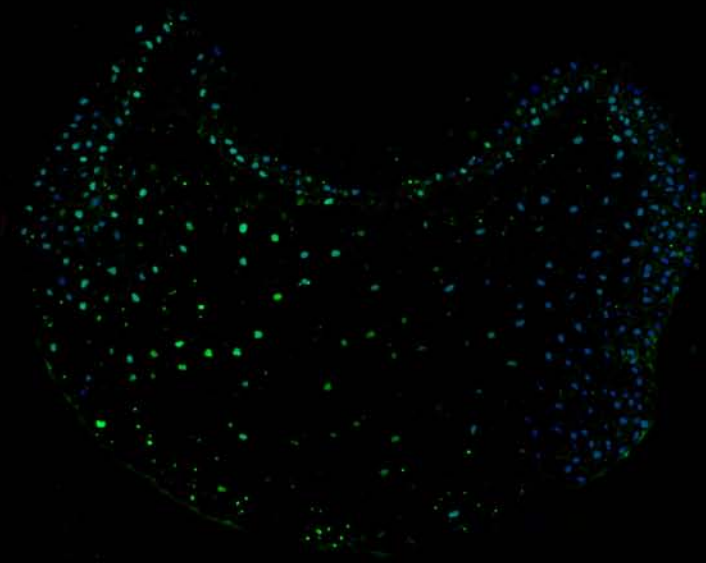

stage 11

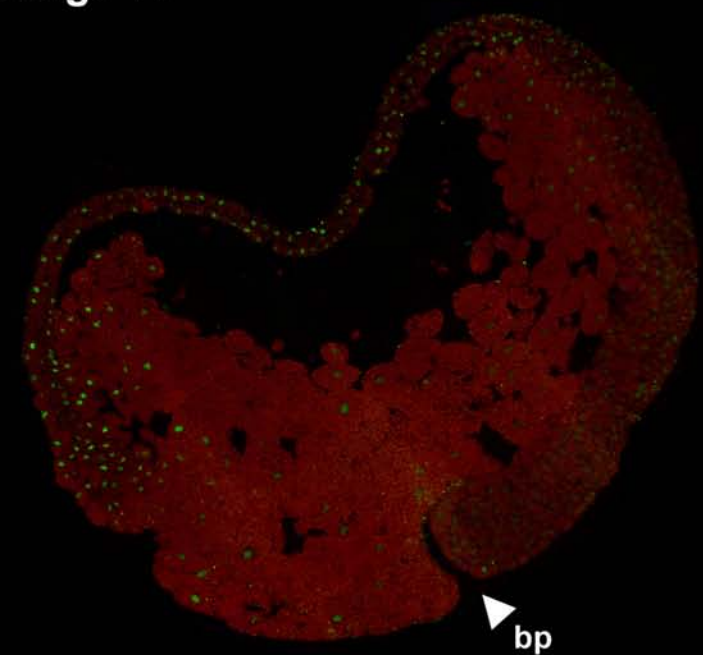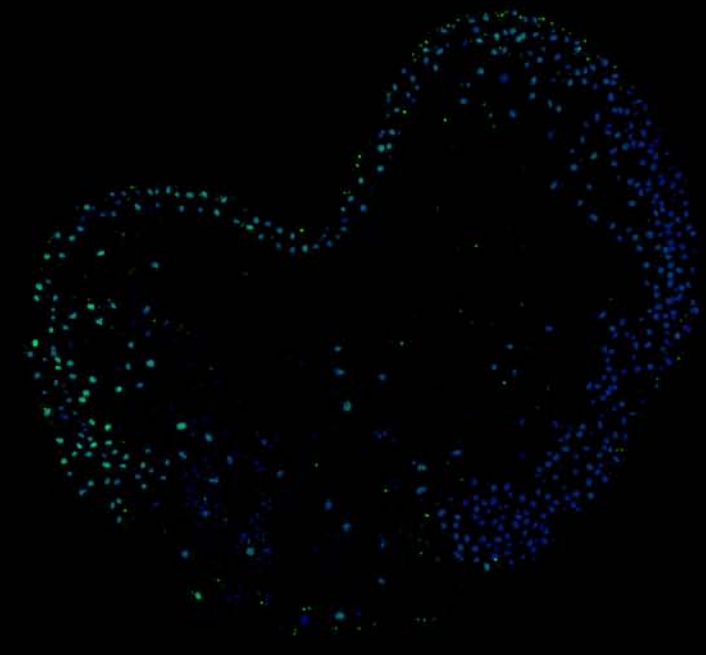

stage 12

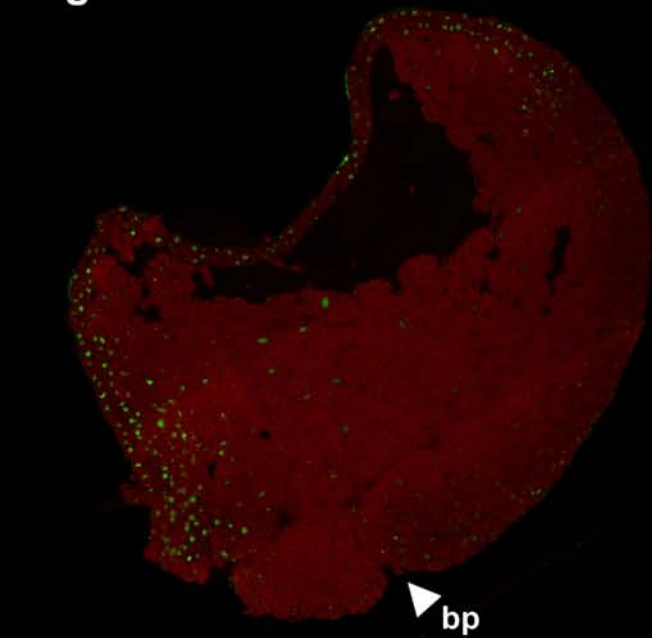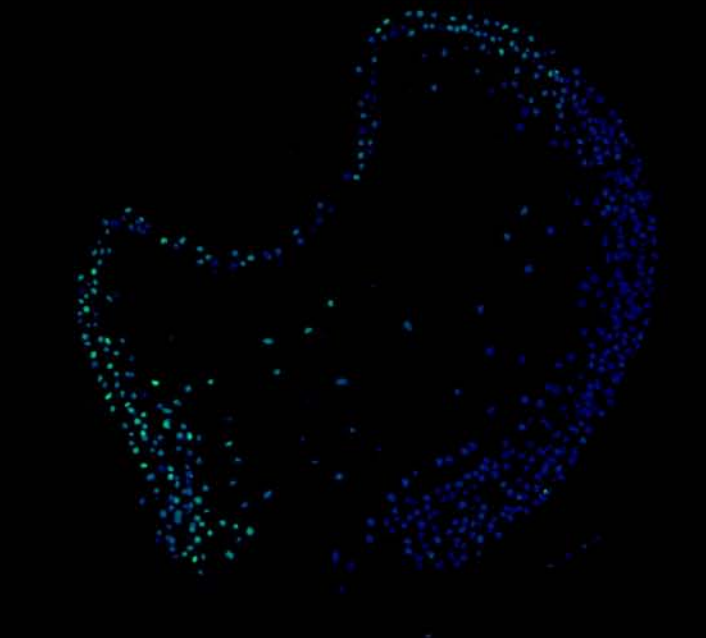

P-Smad1/Eriochrome

mask: P-Smad1/DAPI

stage 13  
sagittal

DORSAL

ne  
ax

ac

dl

en

vl

bl

VENTRAL

stage 16  
parasagittal

DORSAL

ne  
sm

ac

cc

ey

en

VENTRAL

stage 16  
transversal

no

ne

sm

ac

en

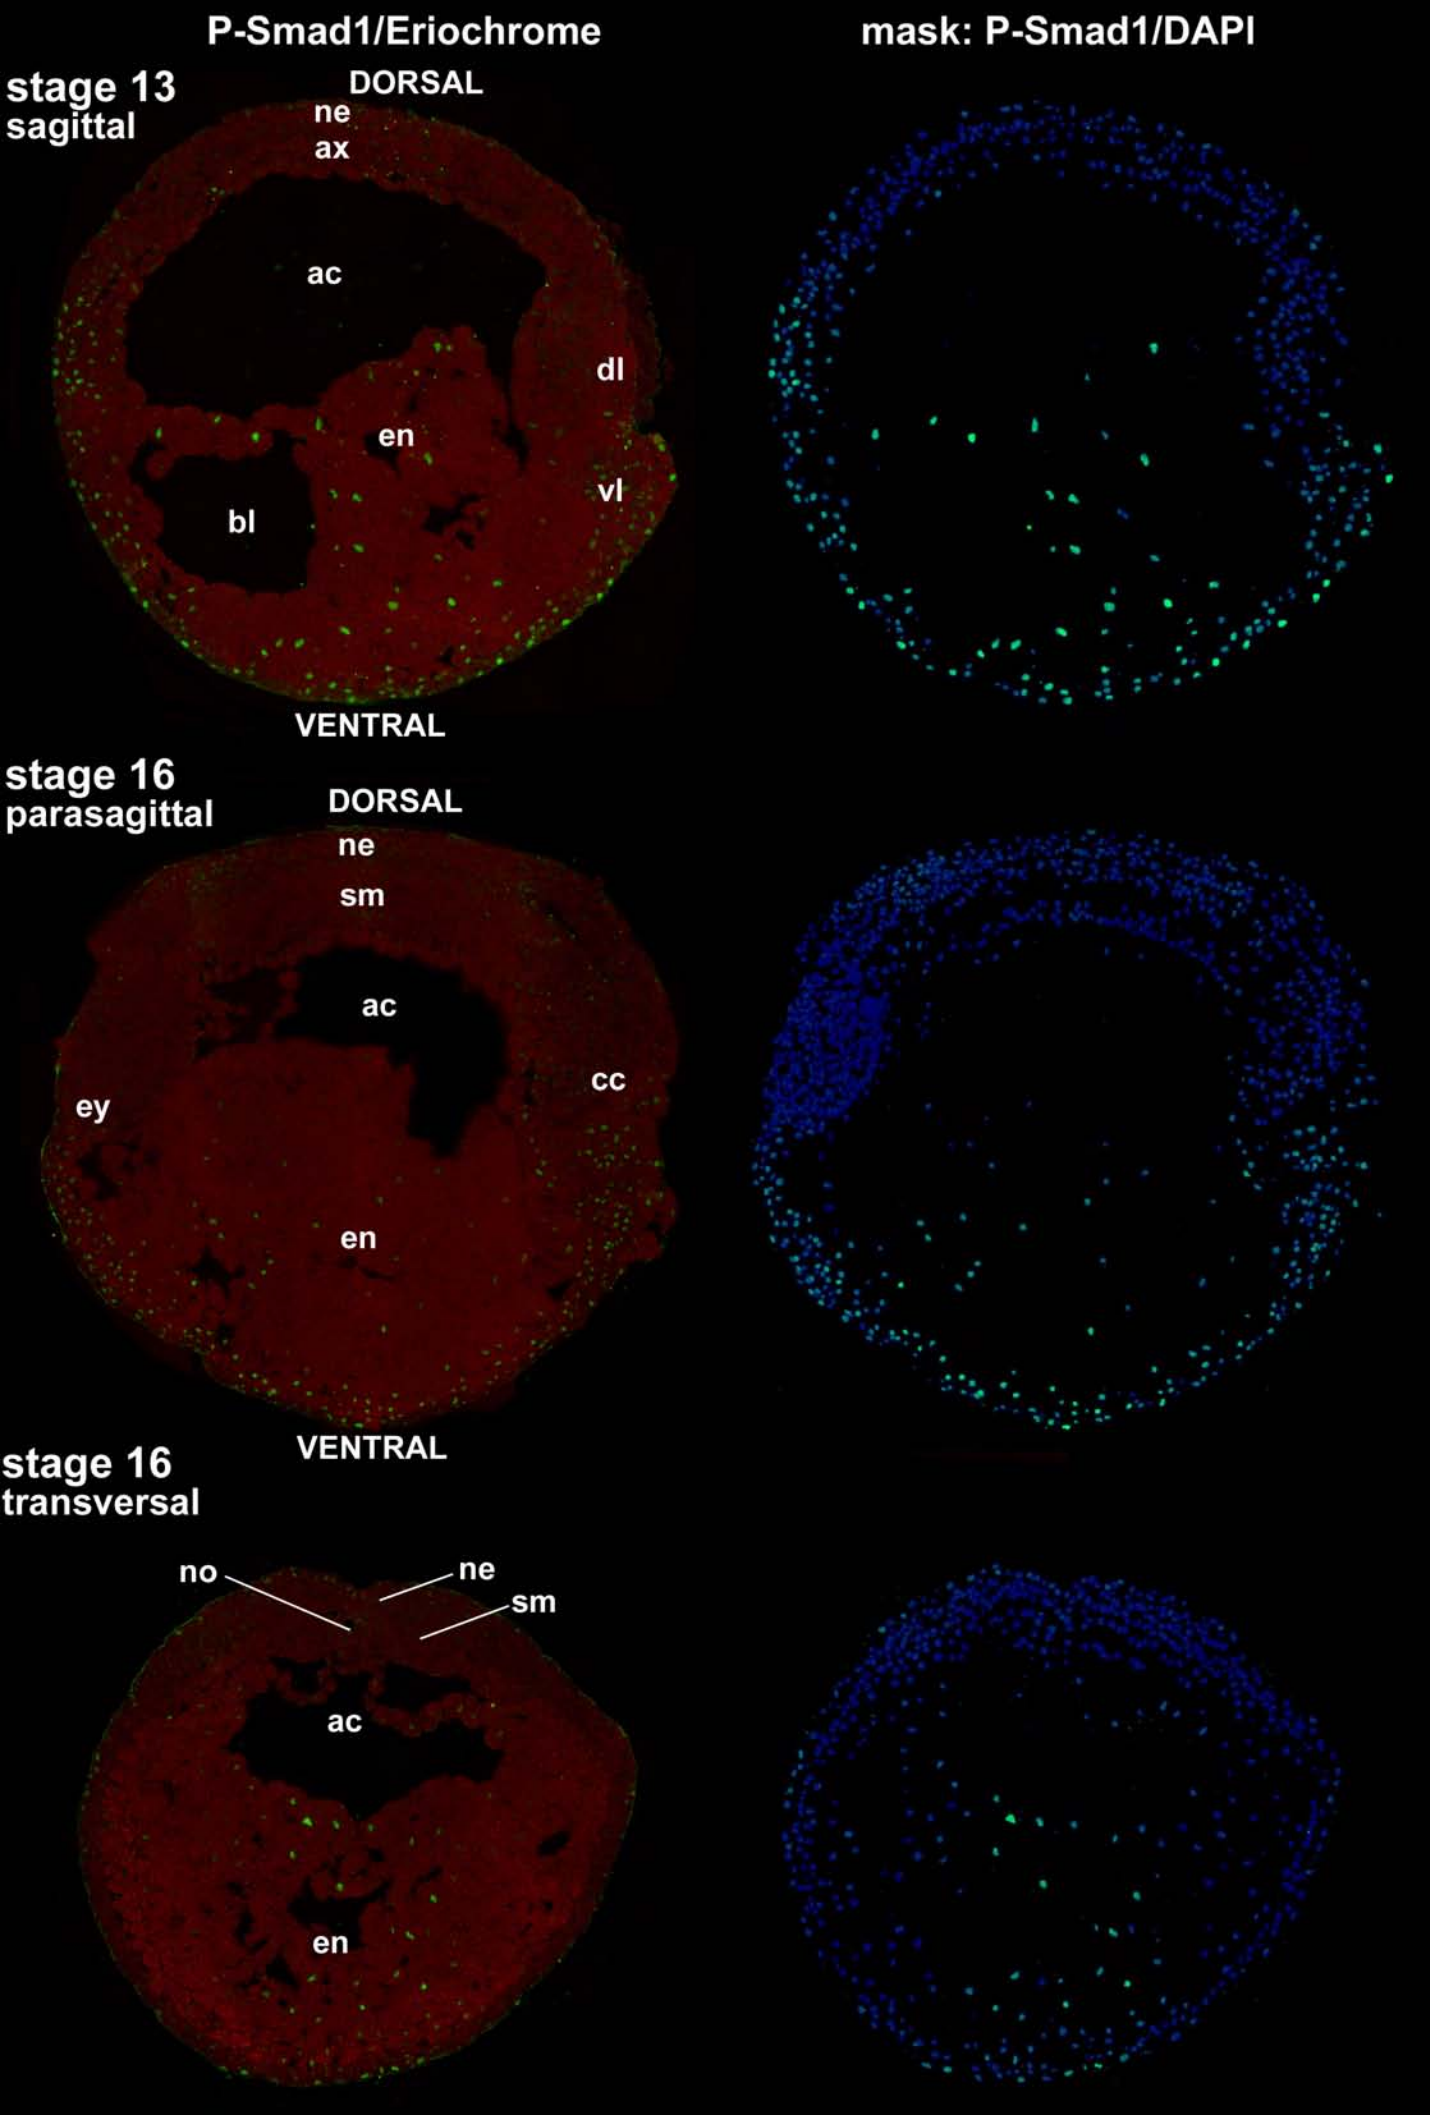



P-Smad1/Eriochrome

mask: P-Smad1/DAPI

stage 20  
parasagittal

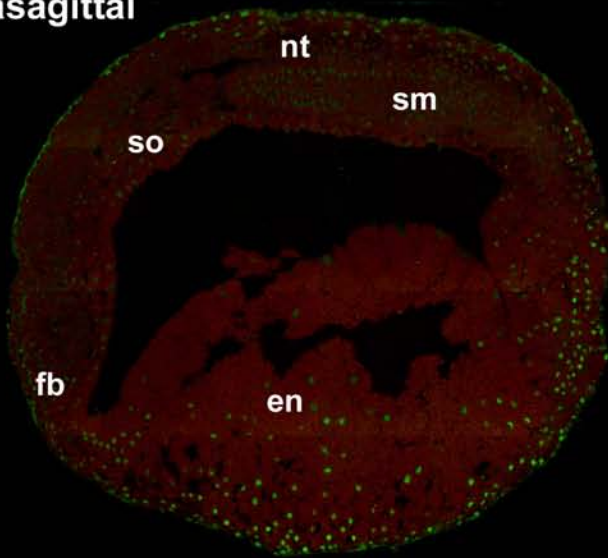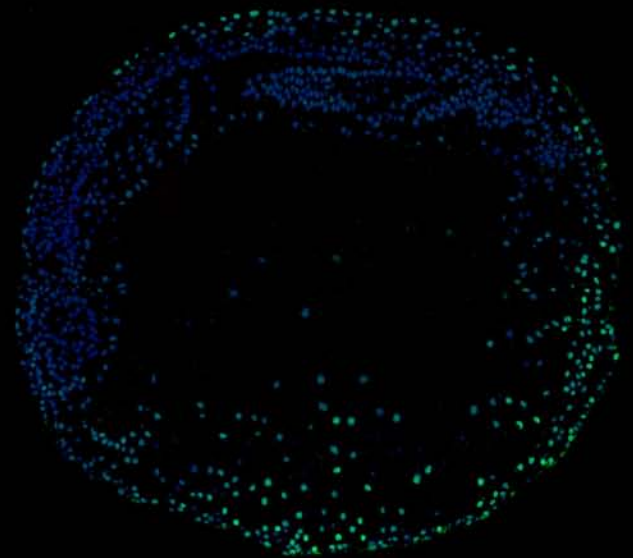

stage 23  
sagittal

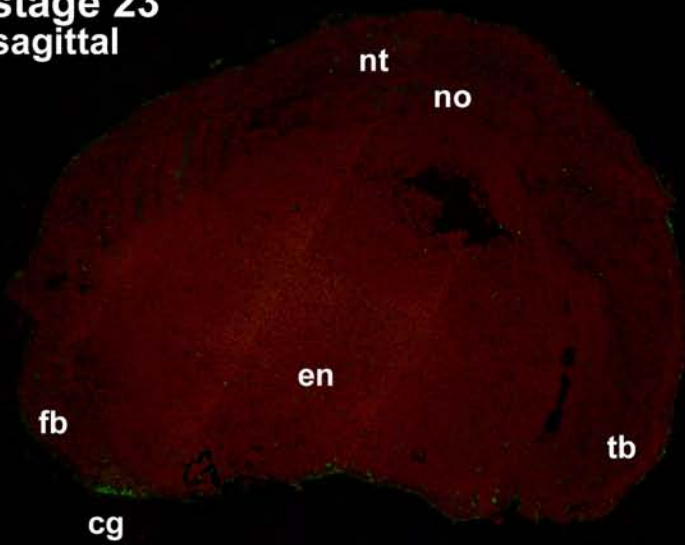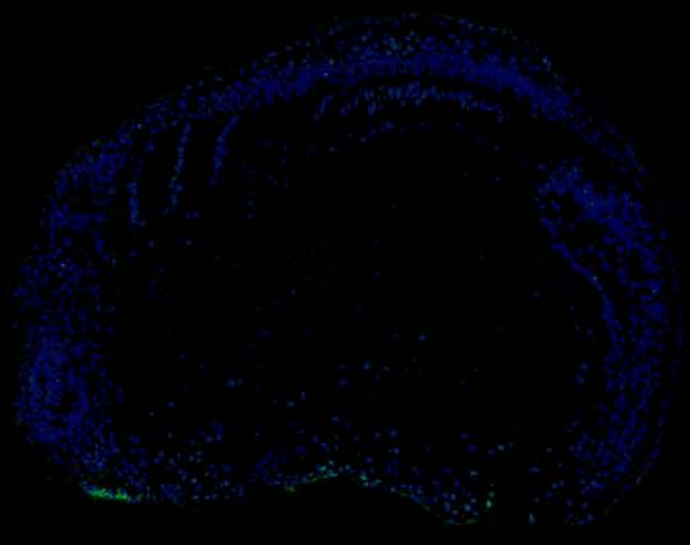

stage 23  
parasagittal

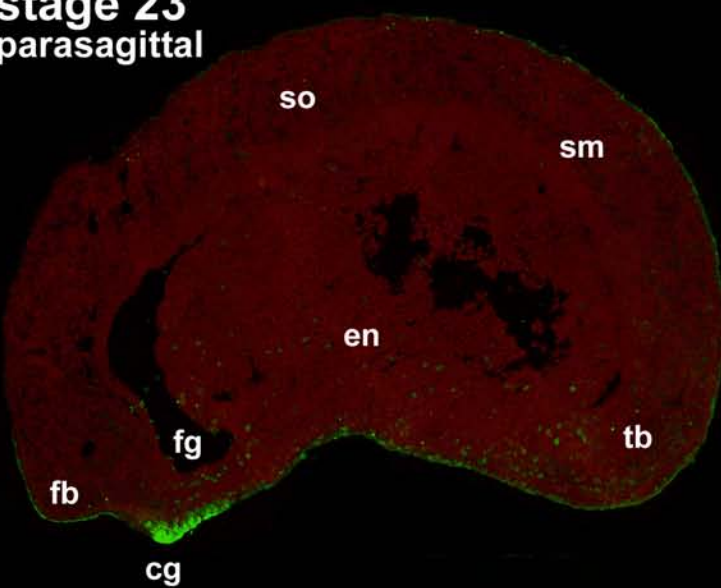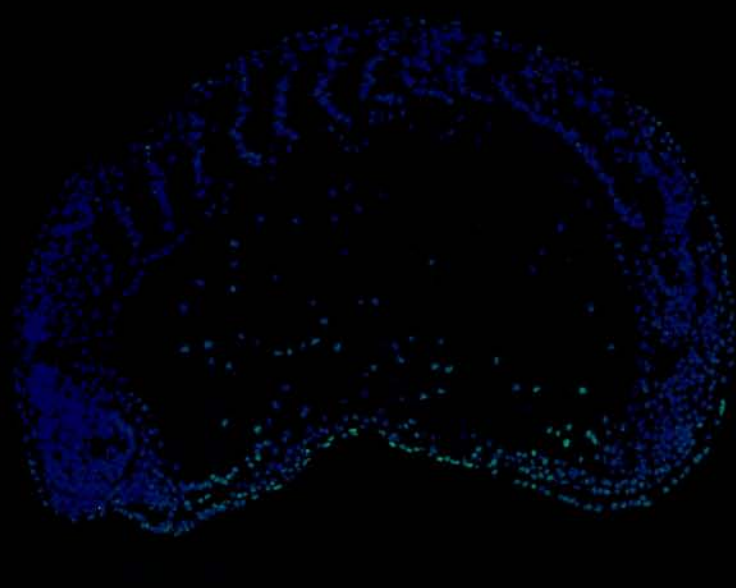

stage 26

P-Smad1/Eriochrome

Sagittal

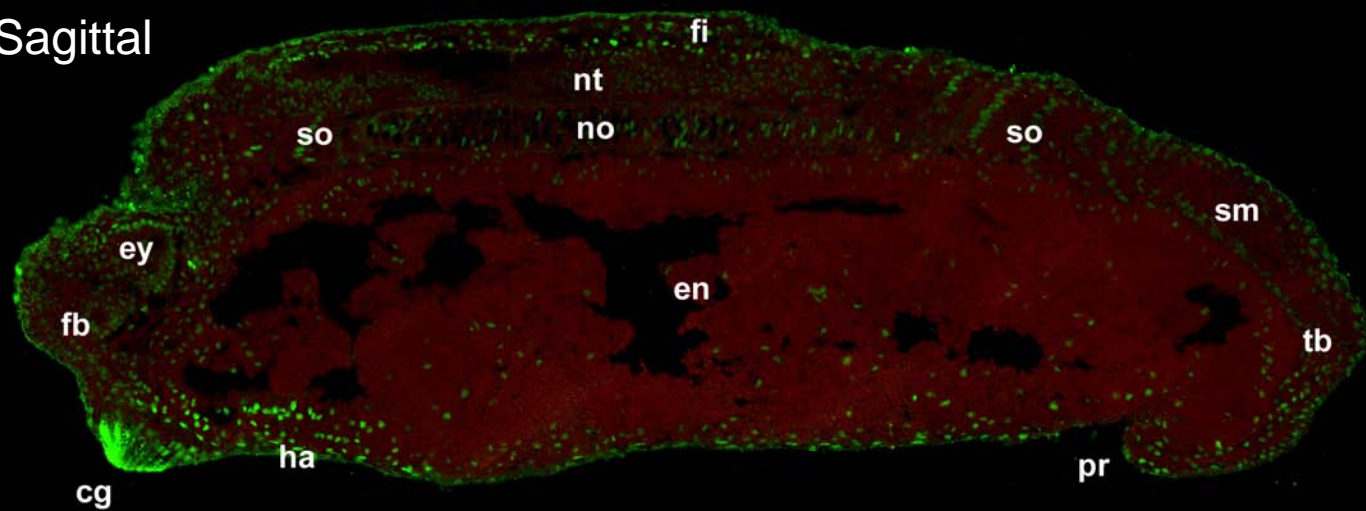

mask: P-Smad1/DAPI

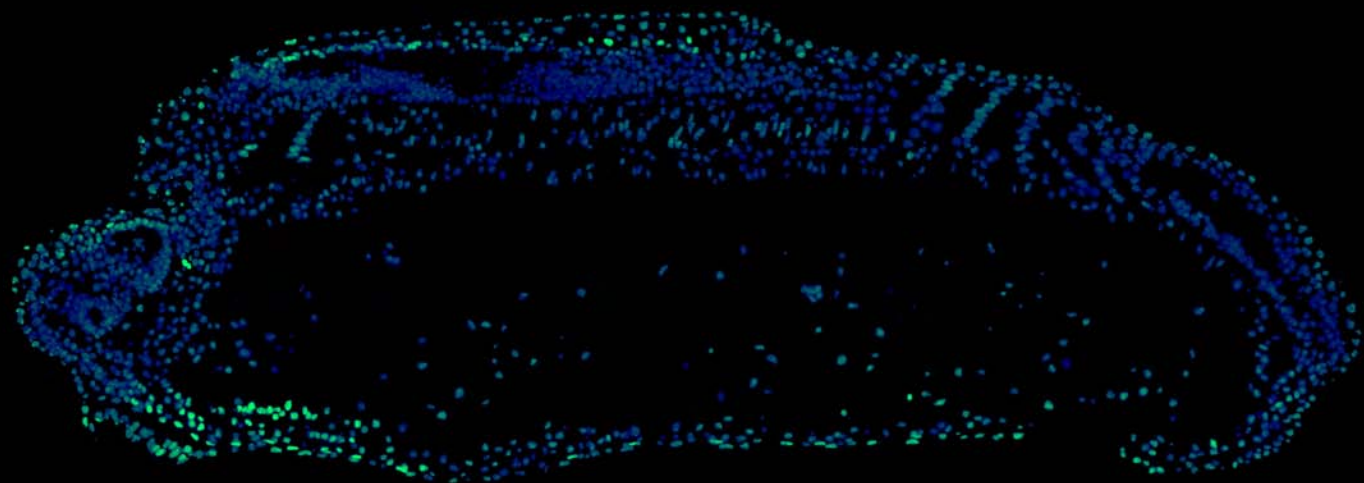

stage 26 transversal

ANTERIOR

P-Smad1/  
Eriochrome

mask:  
P-Smad1/DAPI

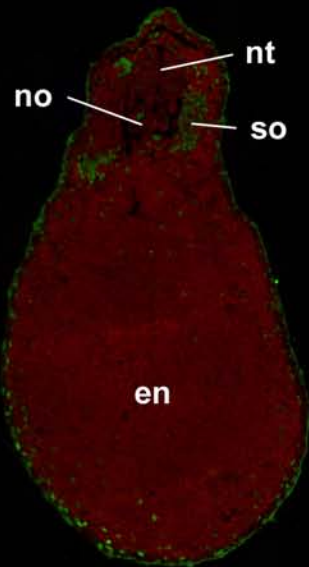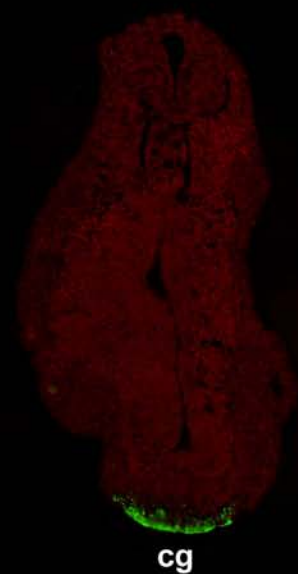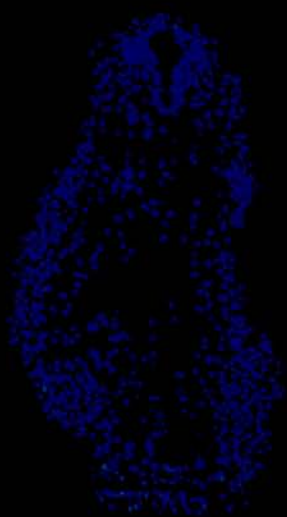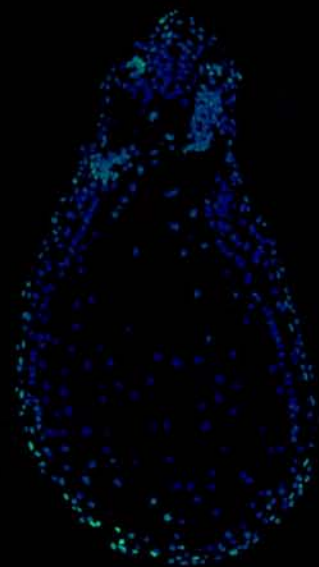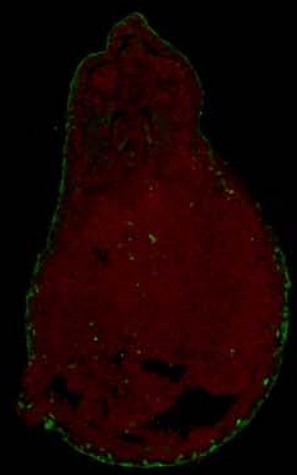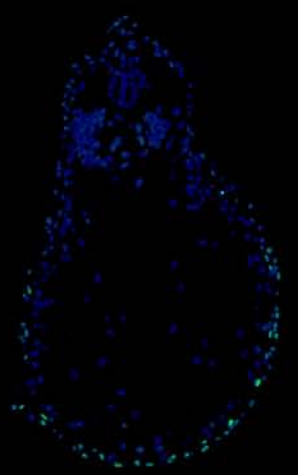

cg

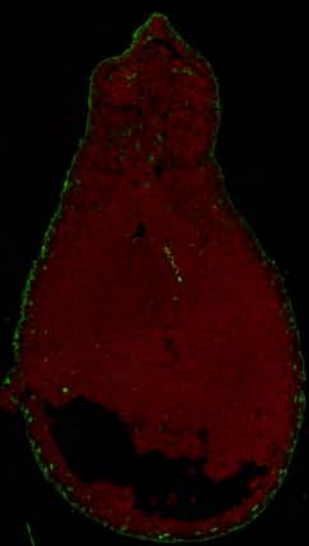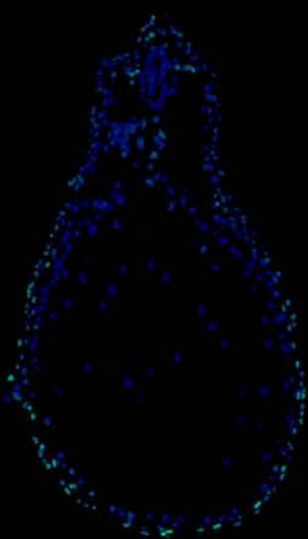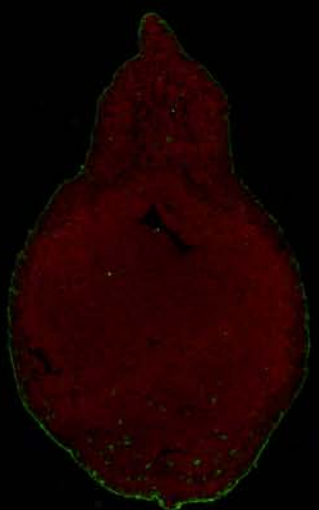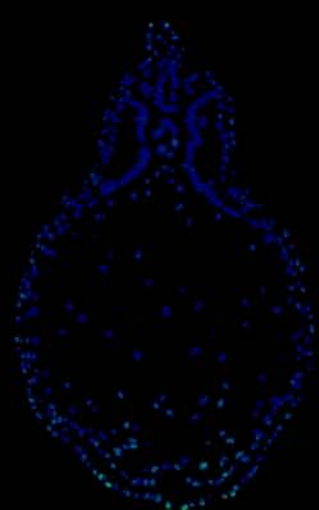

POSTERIOR



stage 31

P-Smad1/Eriochrome

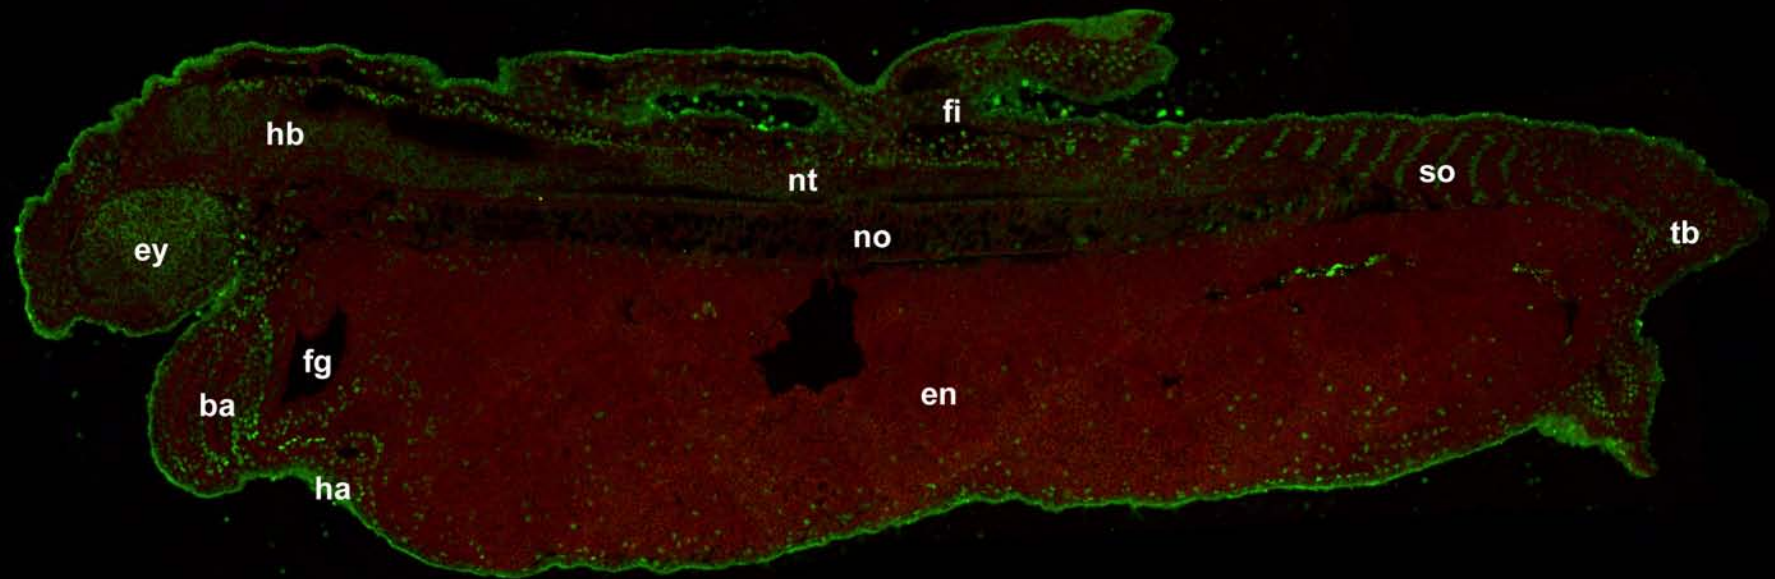

mask: P-Smad1/DAPI

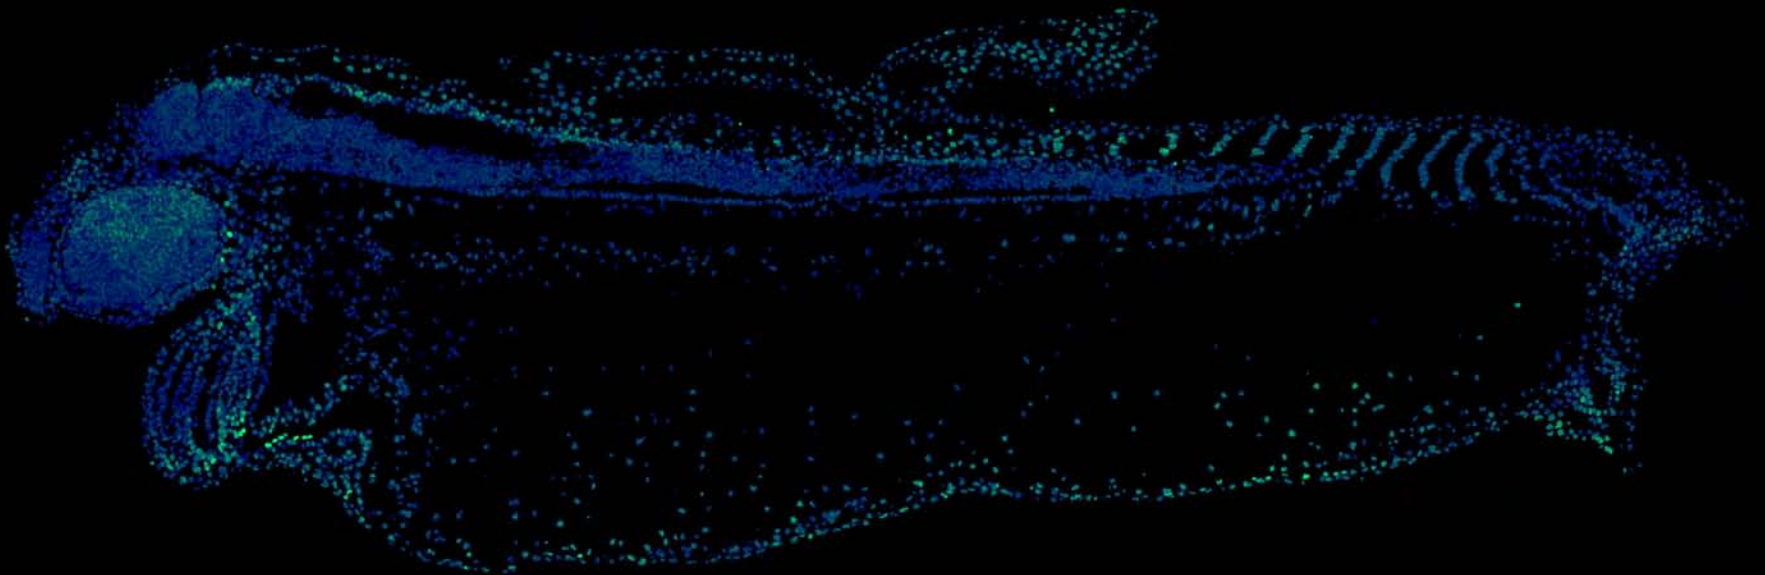

Supplement: dev129137-sup-fig2smad1.pdf [file dev129137-sup-fig2smad1.pdf]
