# Supplementary material for: β-catenin, MAPK and Smad signaling during earlyXenopusdevelopment
Source: Oxford University Press journal article supplement (doi:10.1242/dev.129.1.37), 2002-01-01

**P-Smad2**

**mask: P-Smad2/DAPI**

**st8**

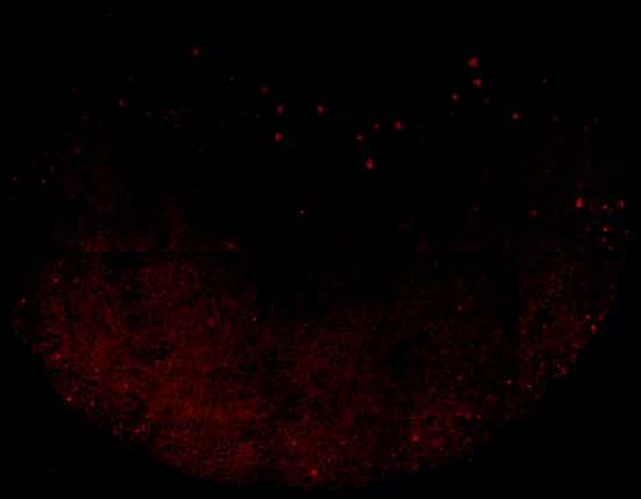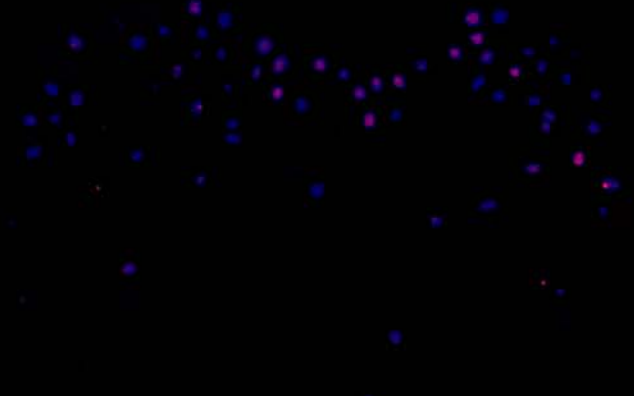

**st8**

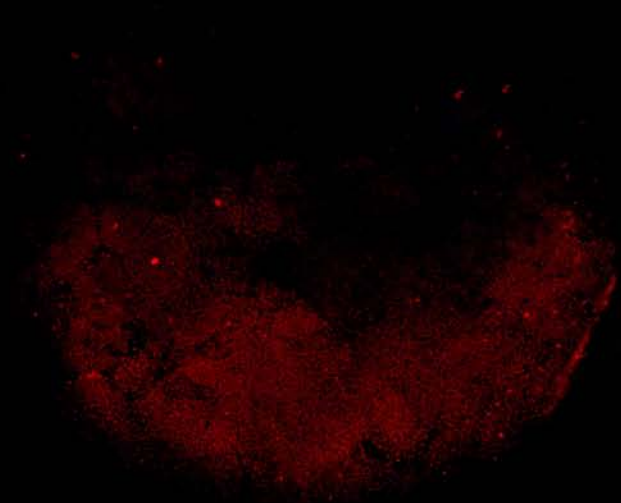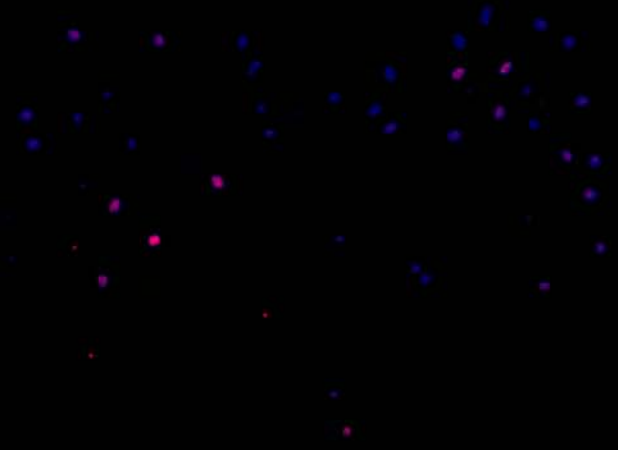

**st8.5**

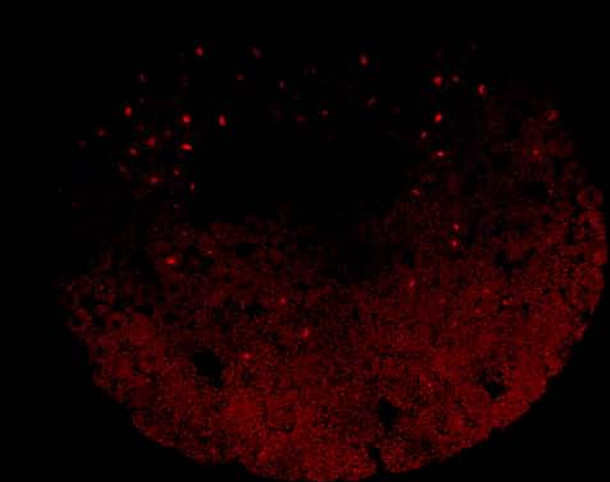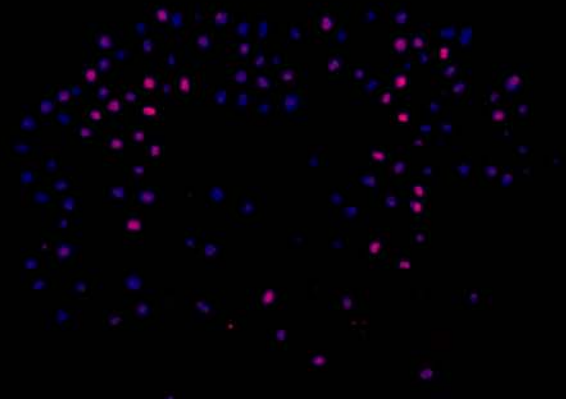

**VENTRAL**

**DORSAL**

**P-Smad2**

**mask: P-Smad2/DAPI**

**st9**

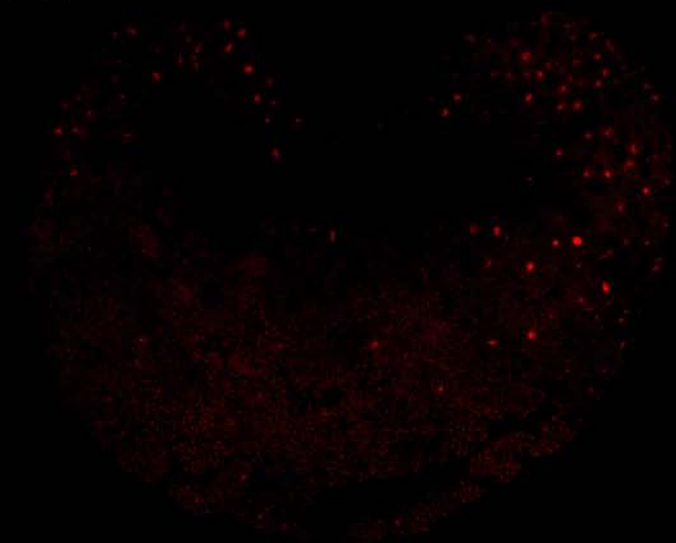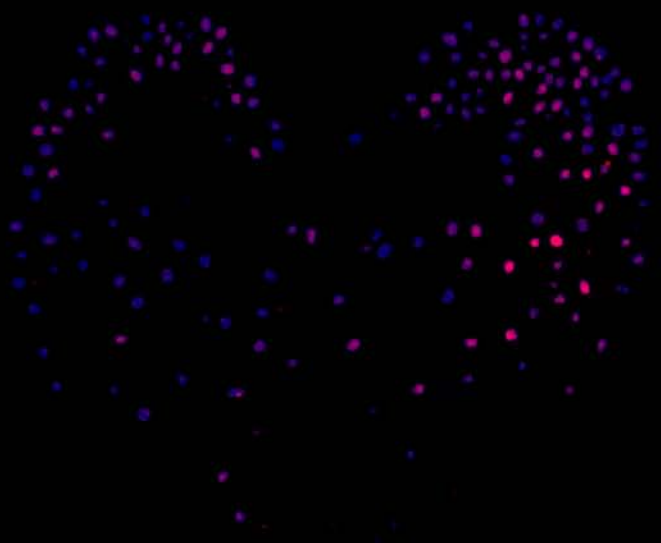

**st9.5**

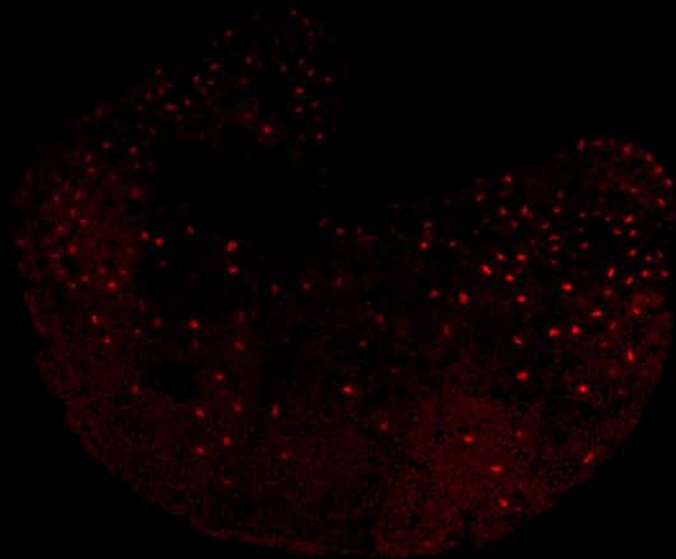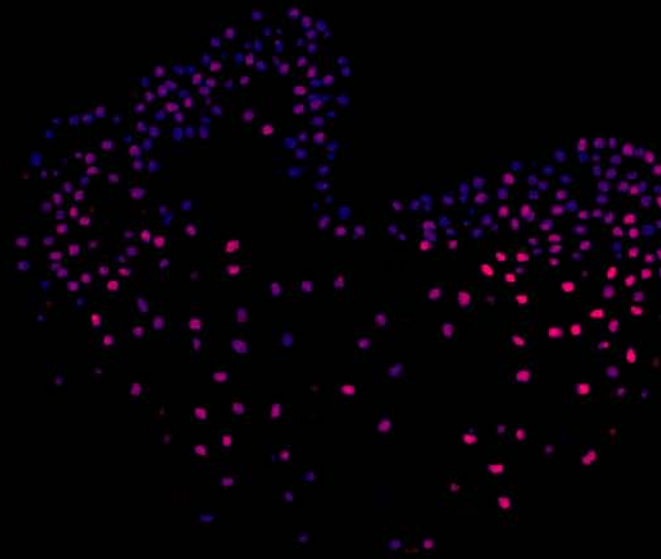

**st10.25**

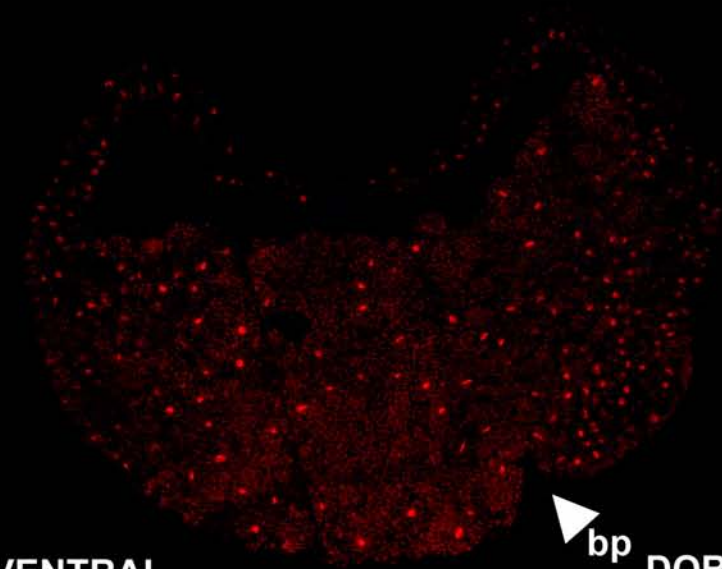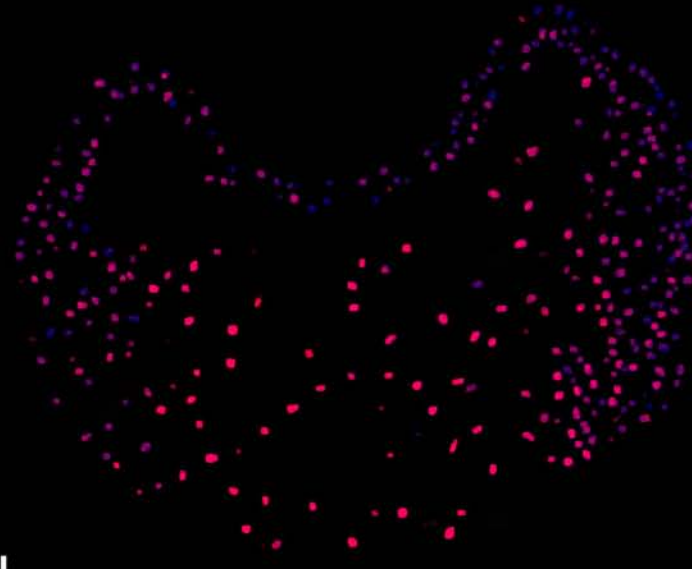

**VENTRAL**

**bp**

**DORSAL**

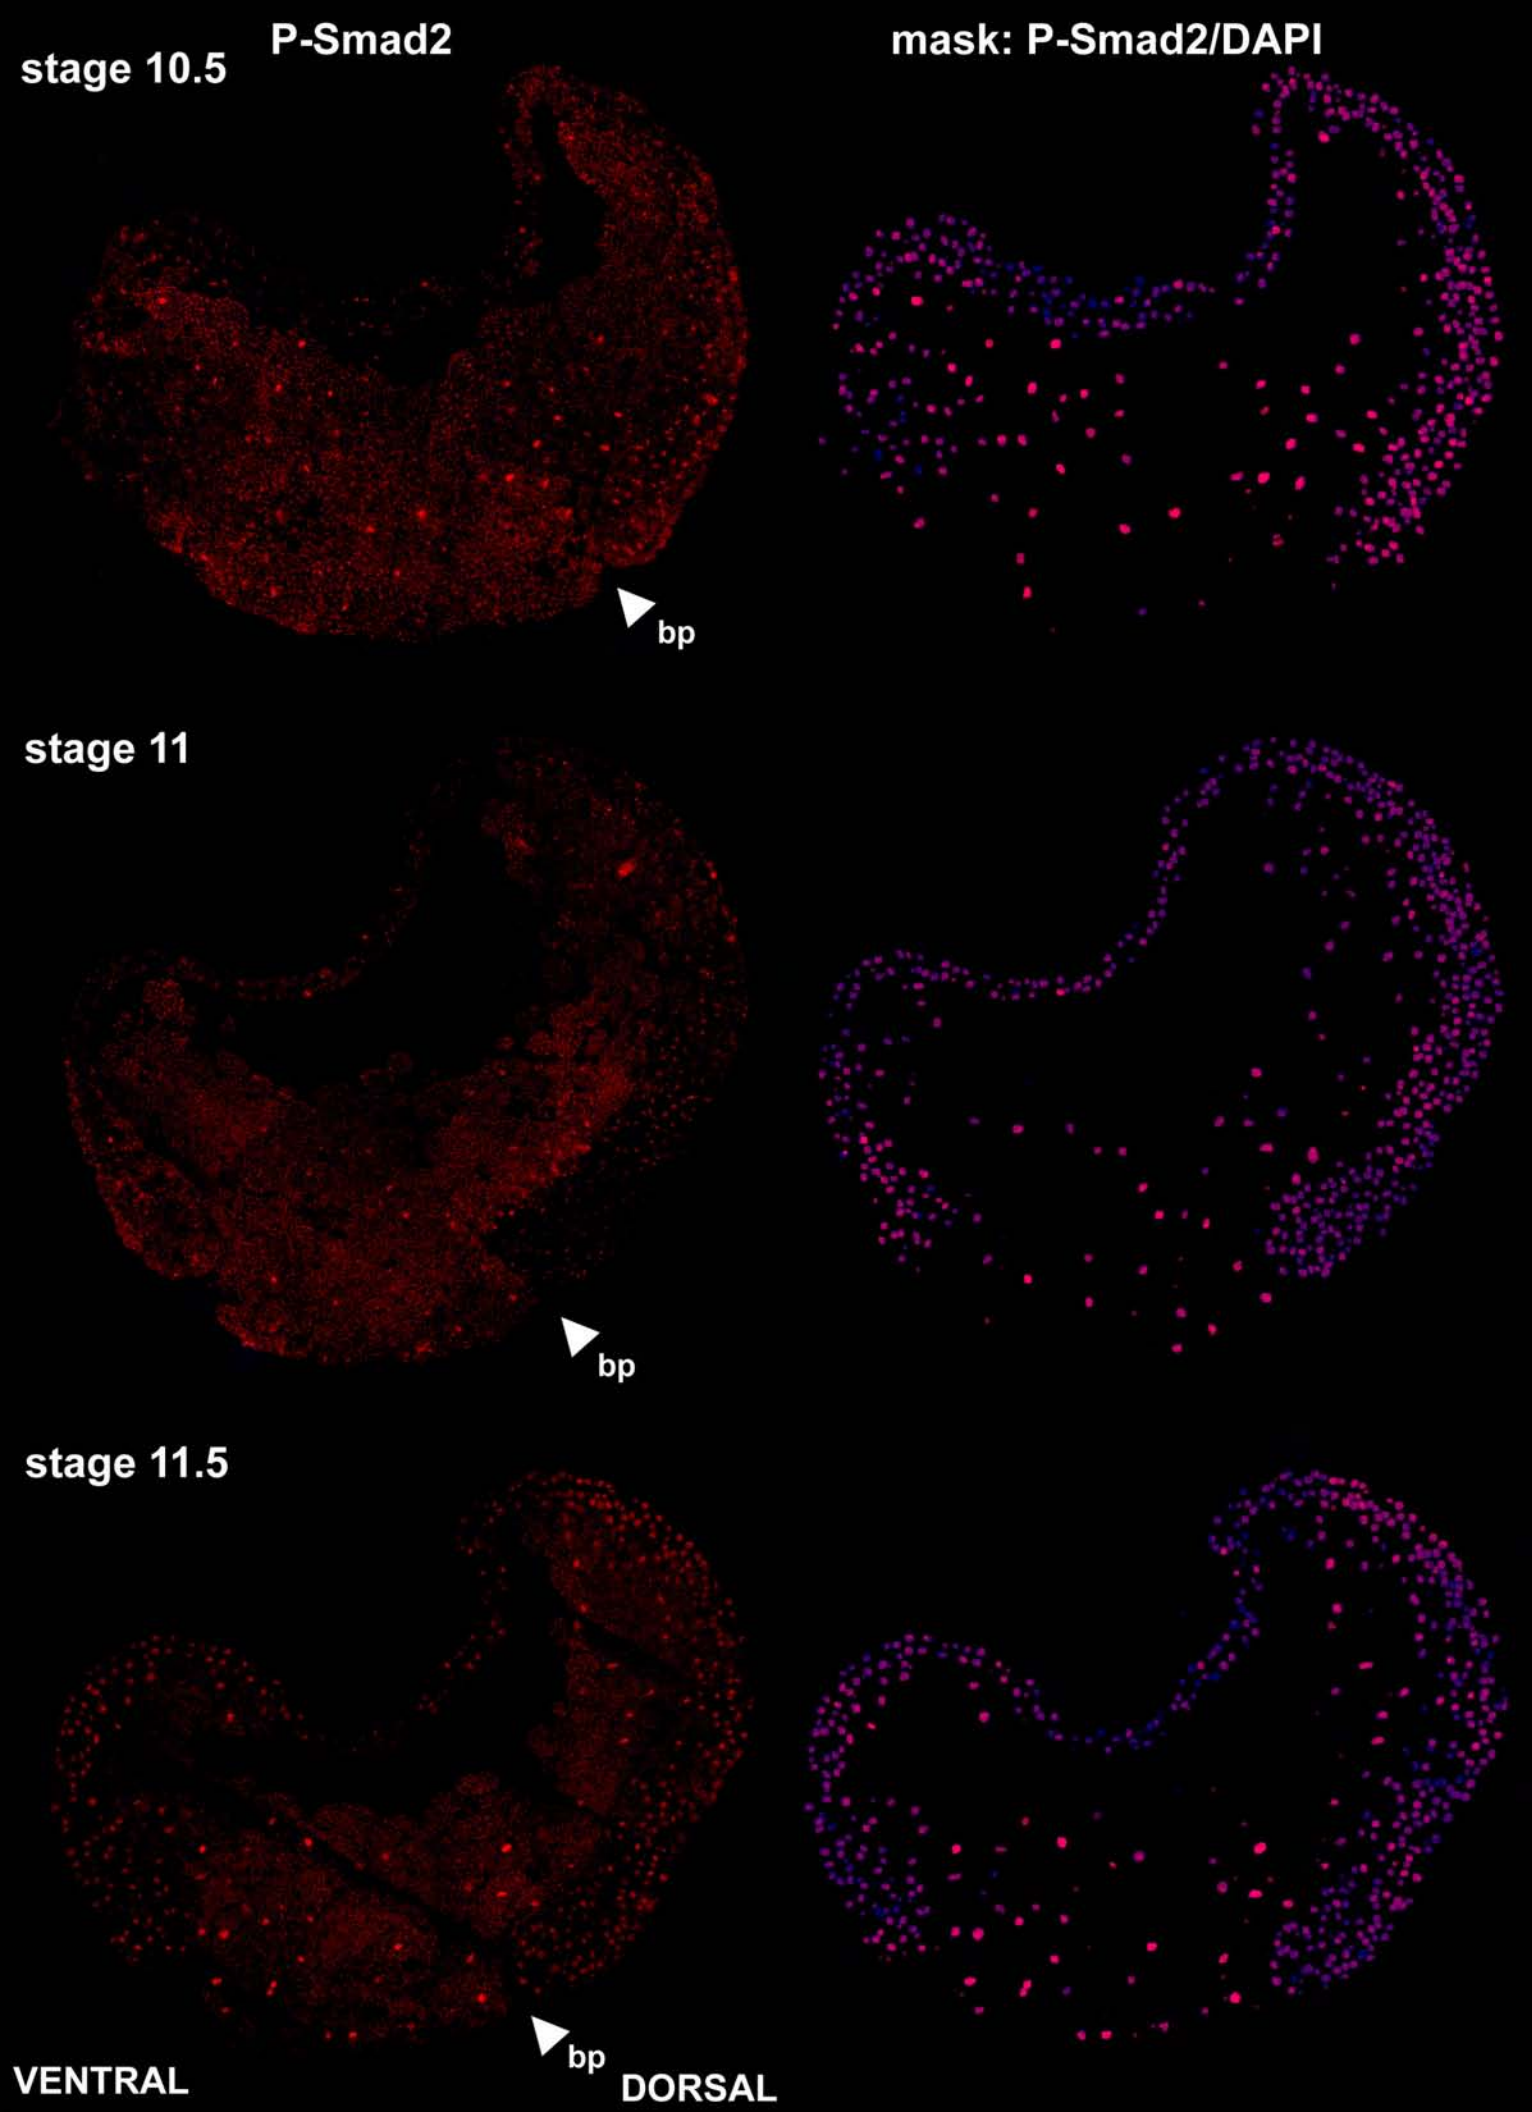

P-Smad2

mask: P-Smad2/DAPI

st13  
sagittal

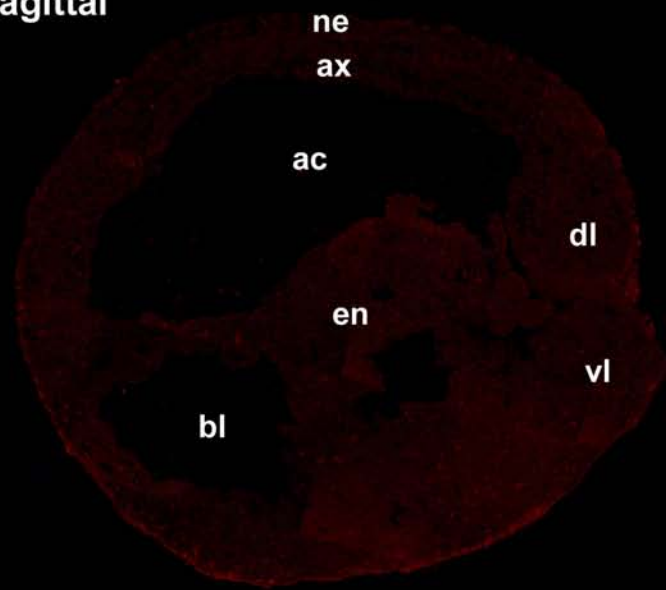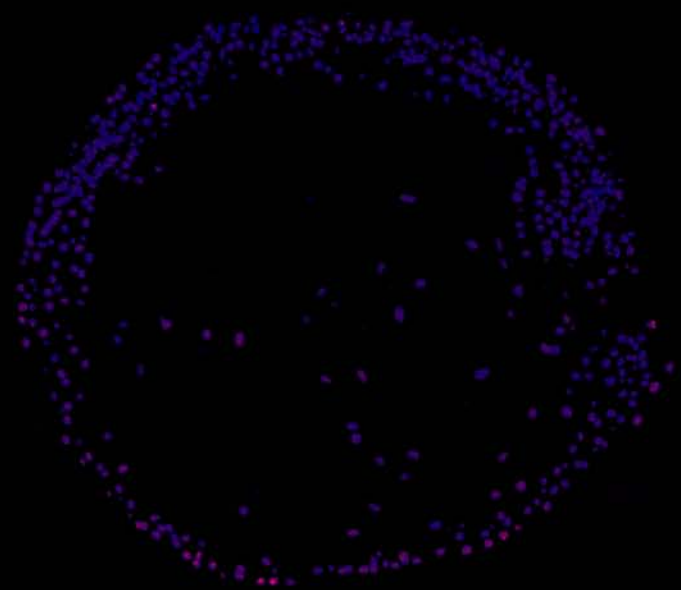

st18  
sagittal

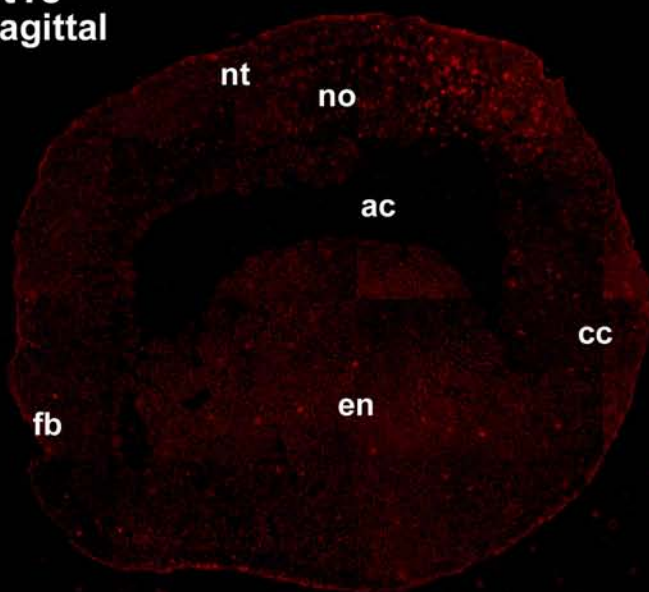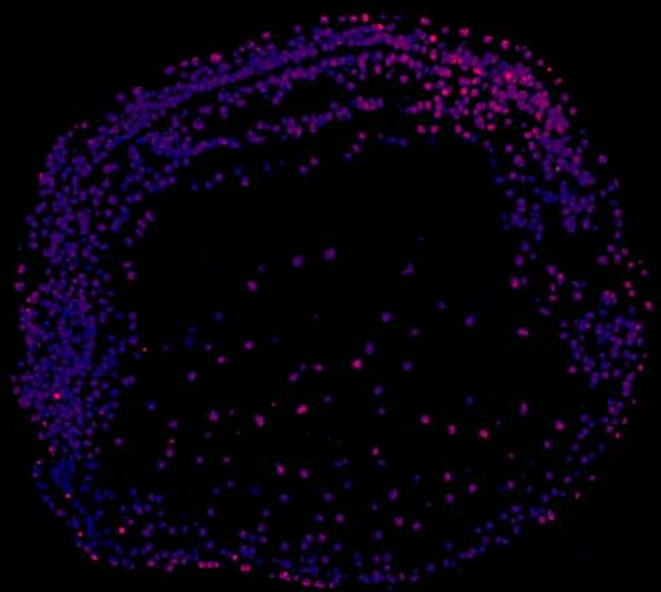

st18  
transversal

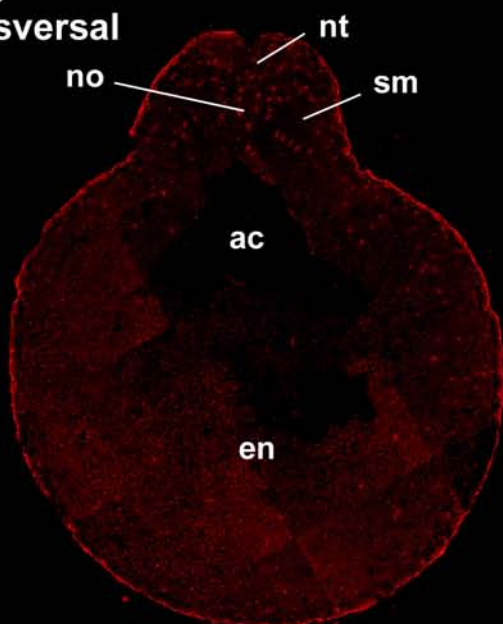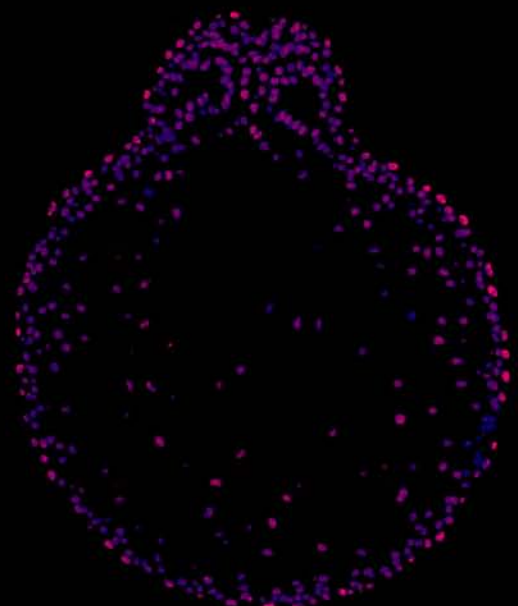

**Smad2**

**mask: Smad2/DAPI**

**stage 20**

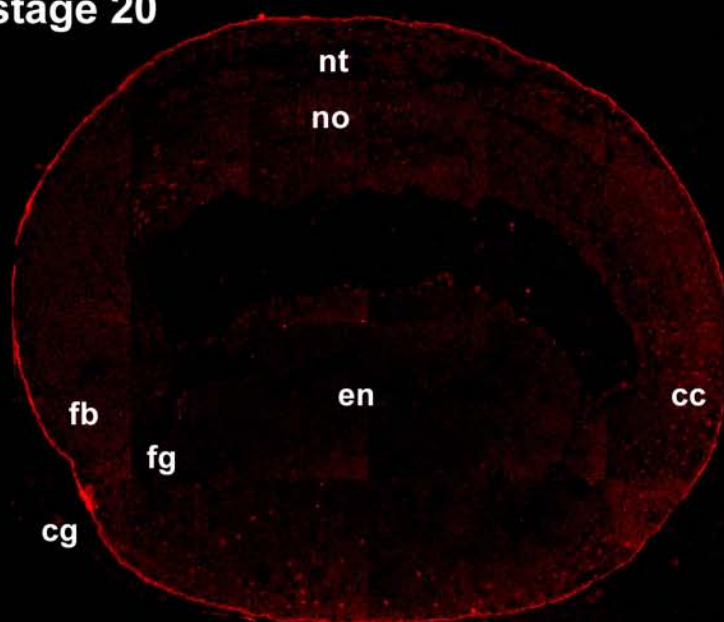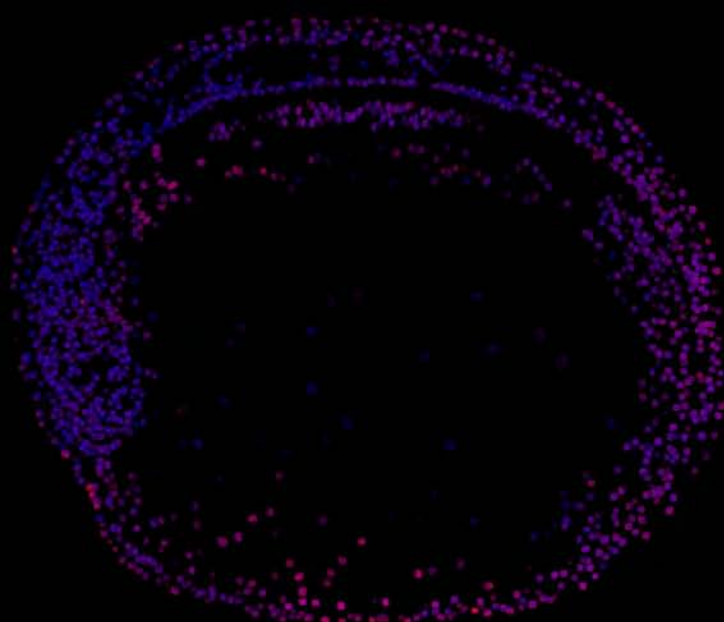

**stage 20 parasagittal**

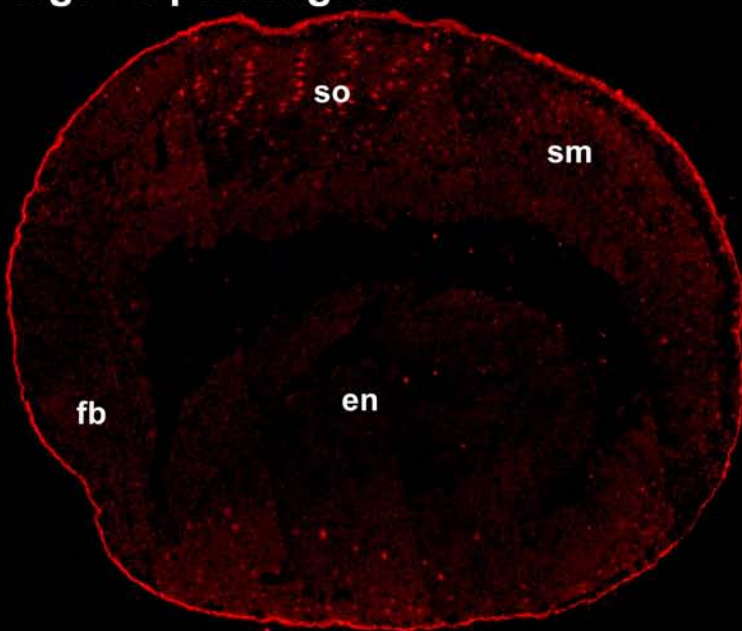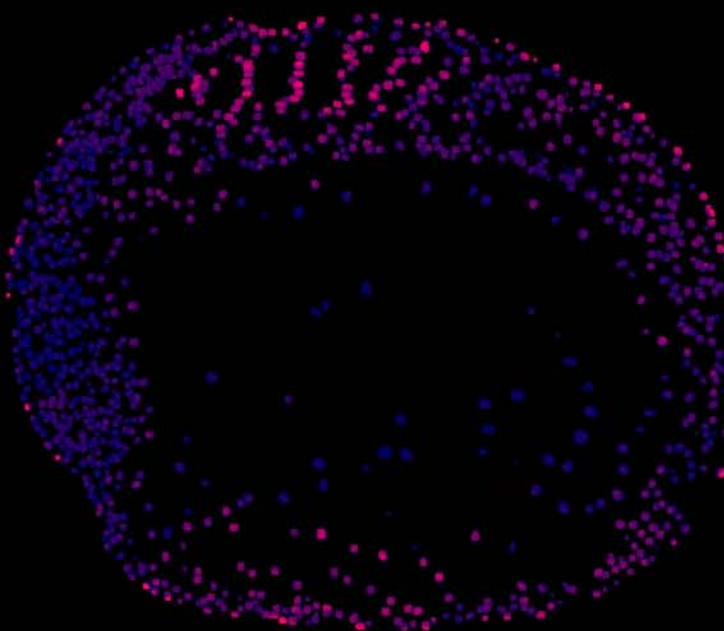

**stage 20 lateral**

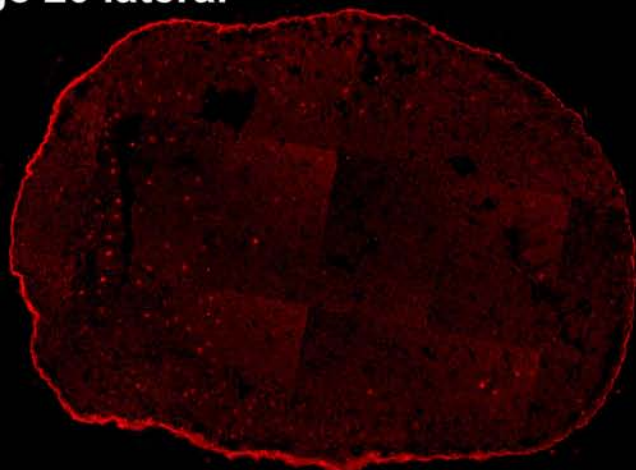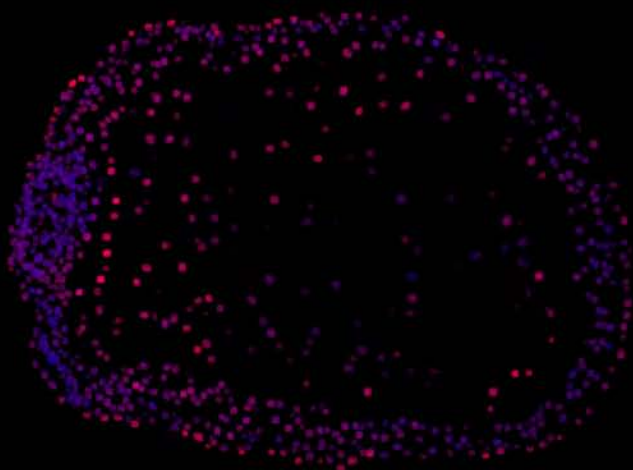

Sagittal

stage 26, notochord

P-Smad2/P-MAPK

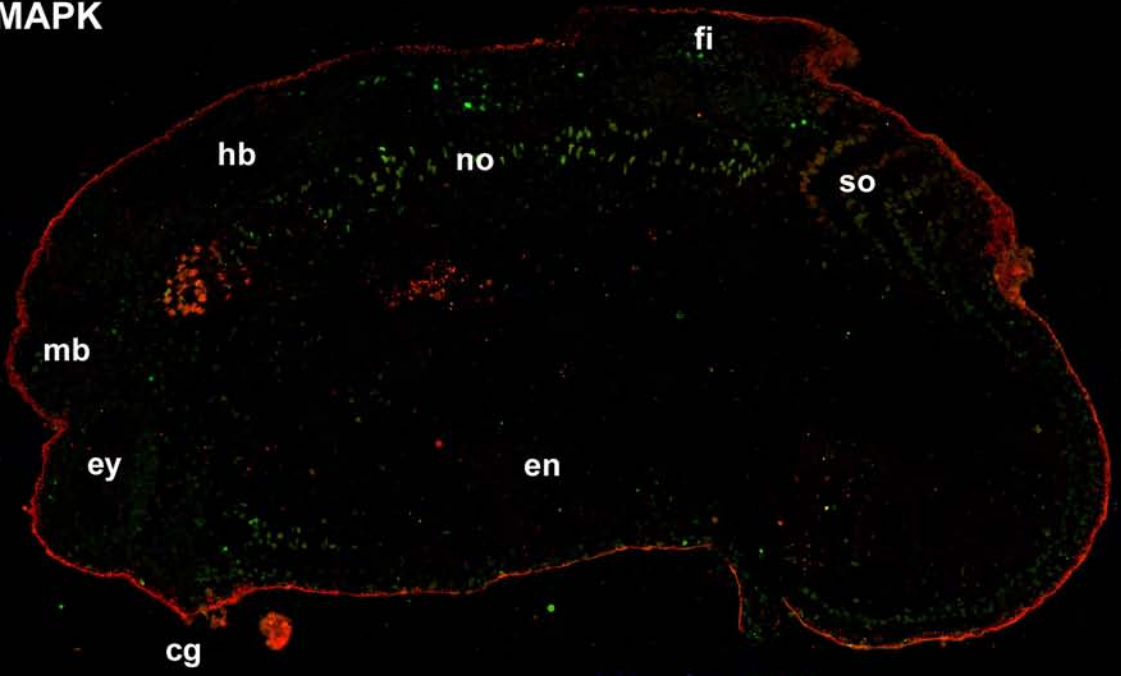

mask:P-Smad2/DAPI

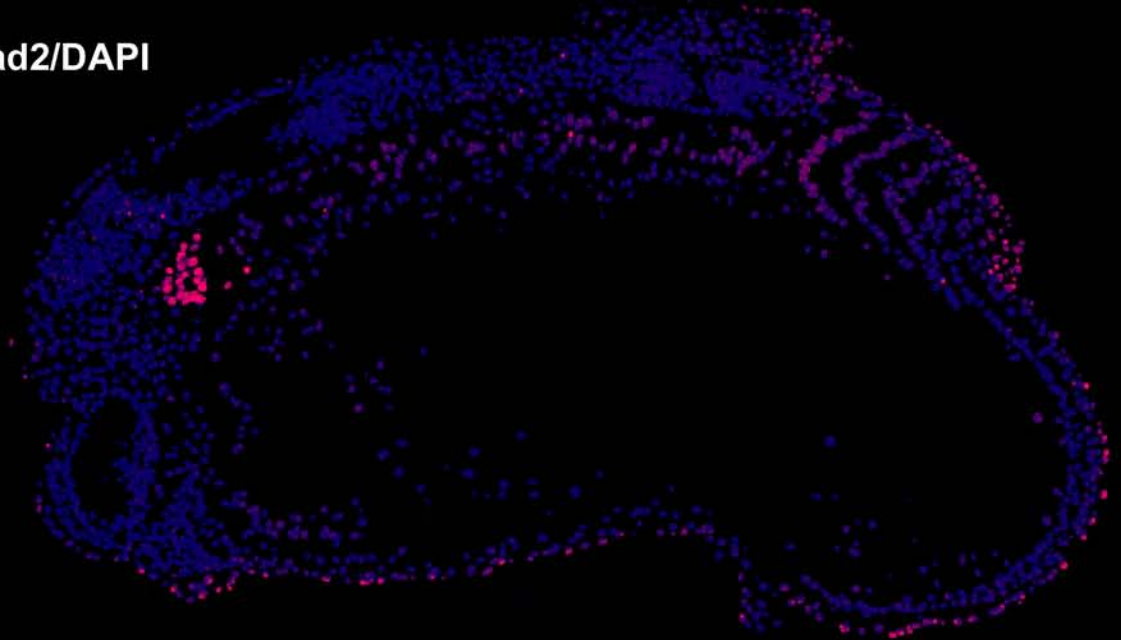

mask: P-MAPK/DAPI

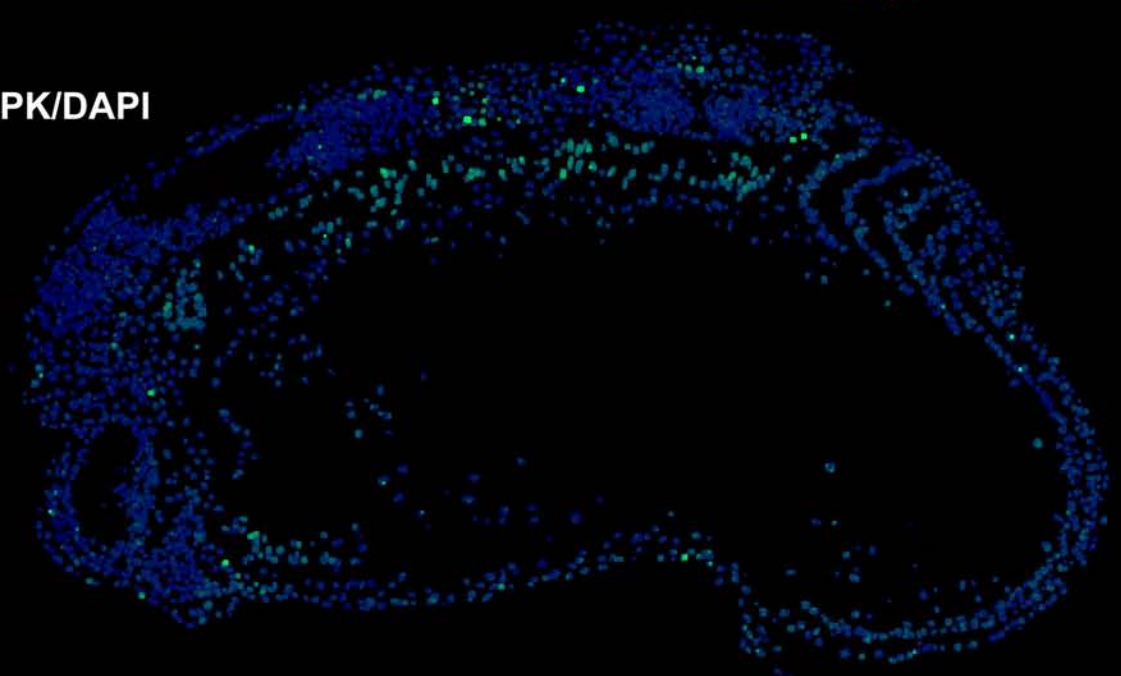

Parasagittal stage 26, somites

P-Smad2/P-MAPK

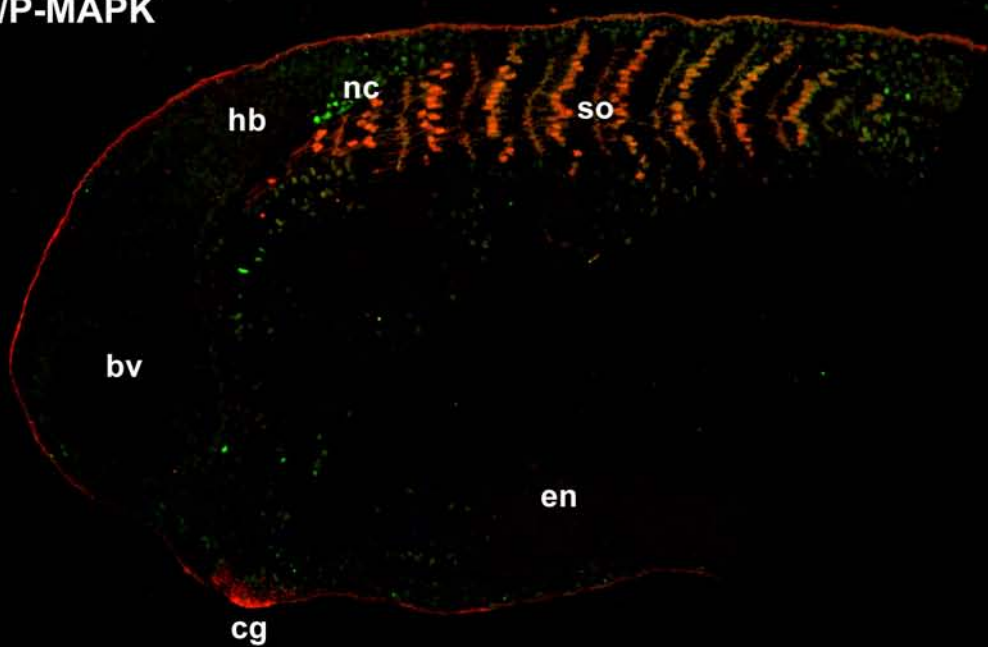

mask:P-Smad2/DAPI

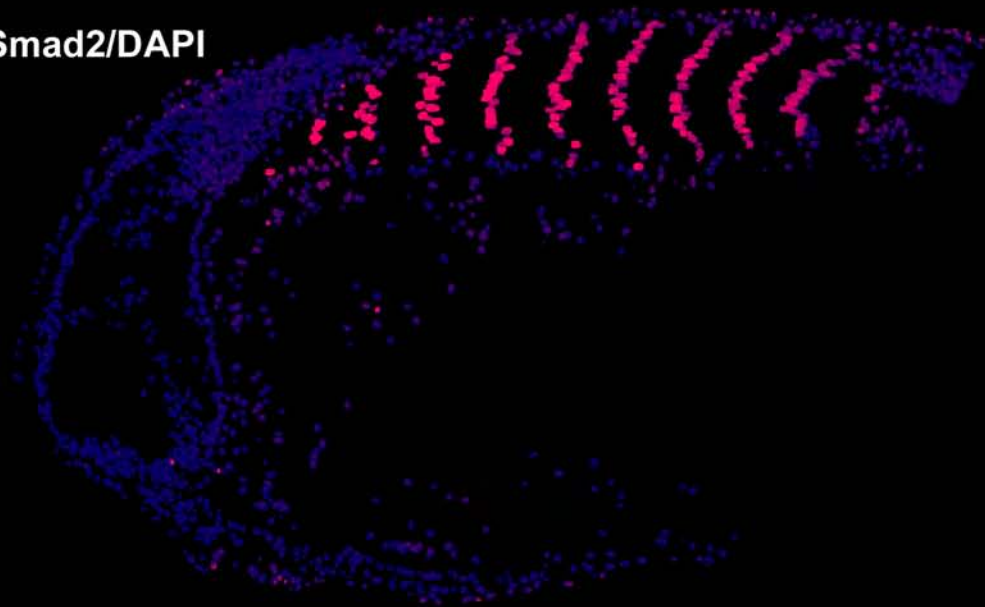

mask: P-MAPK/DAPI

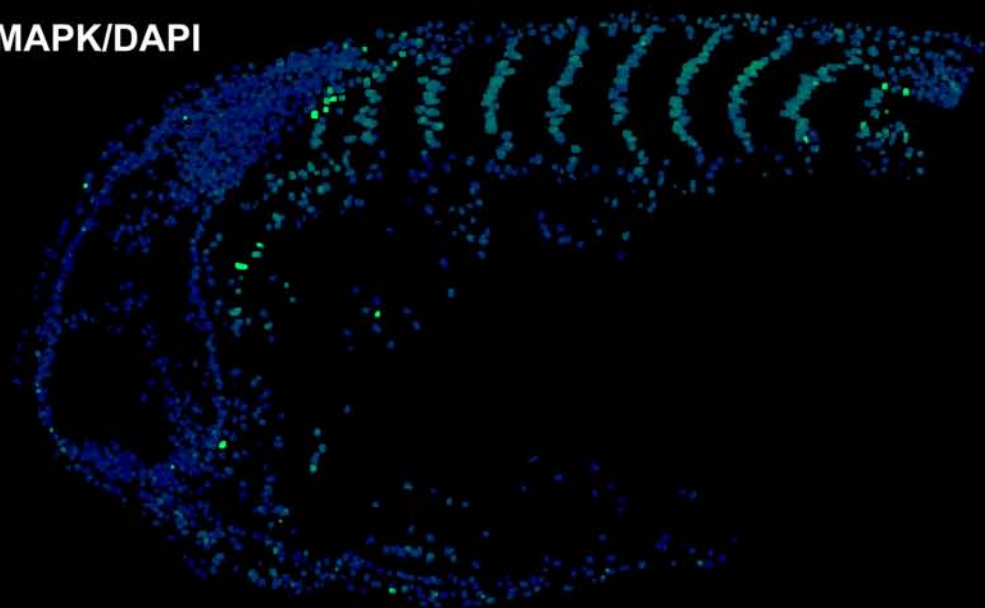

Sagittal

stage 31, notochord

P-Smad2/P-MAPK

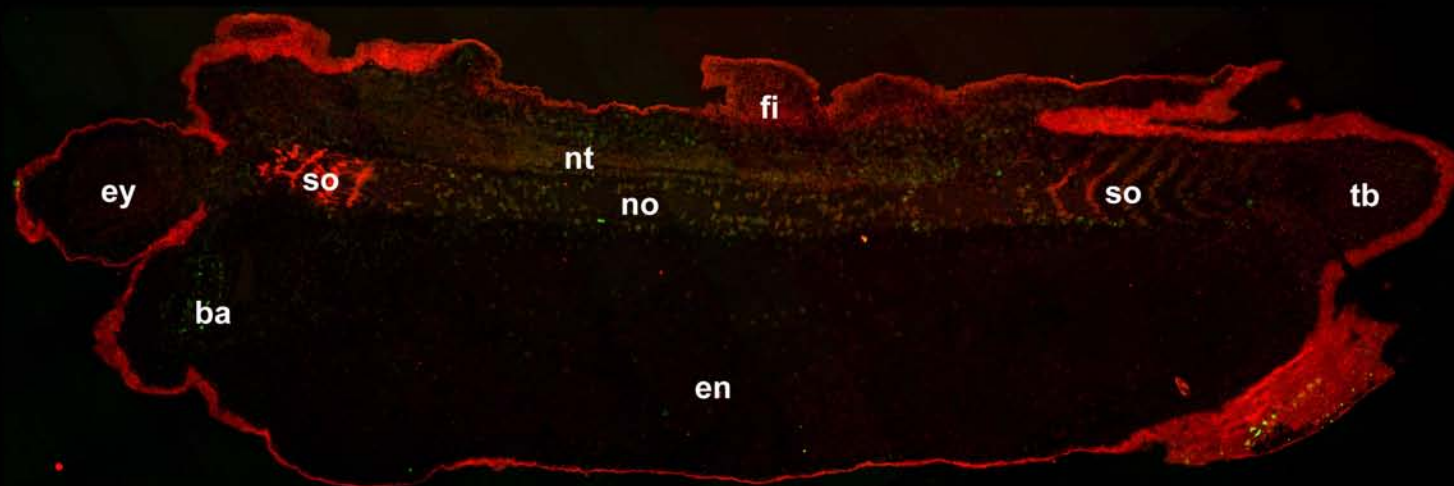

mask: P-Samd2/DAPI

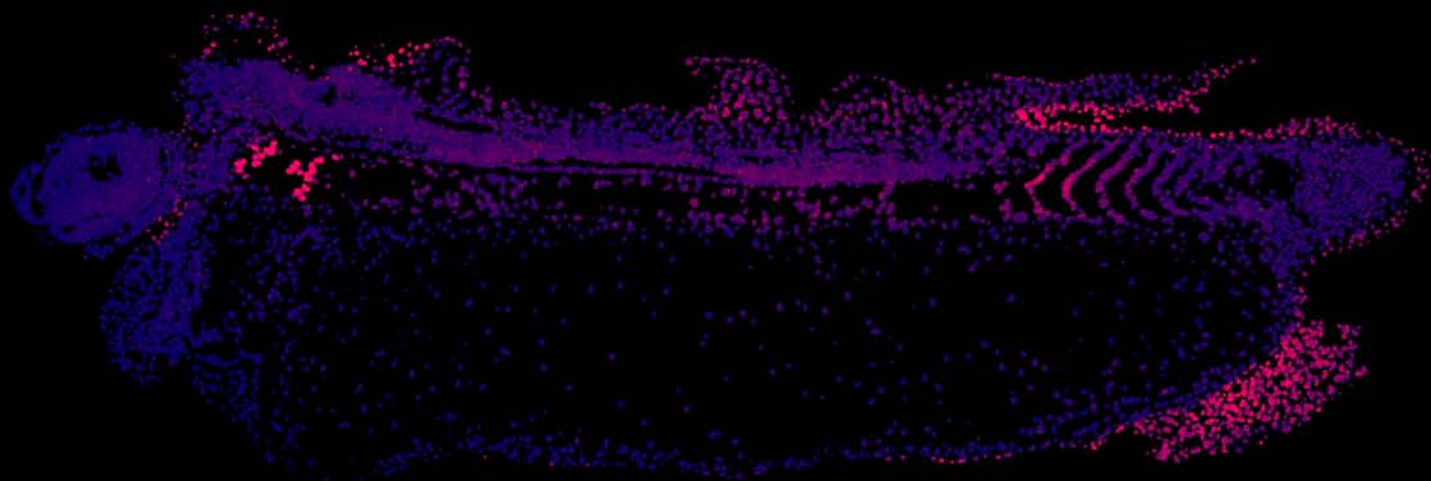

mask: P-MAPK/DAPI

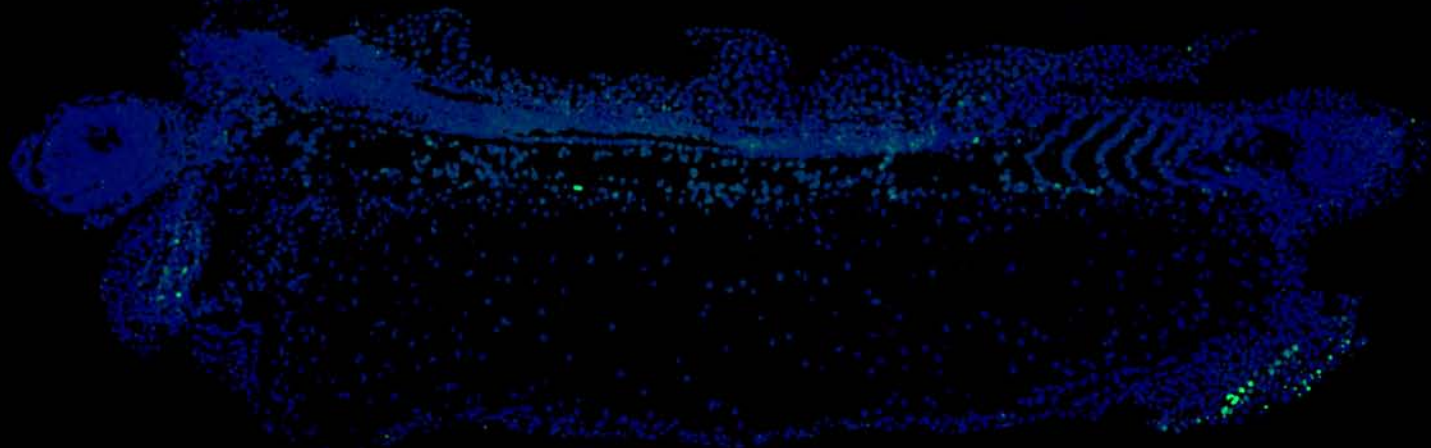



Parasagittal

stage 31, somites

P-Smad2/P-MAPK

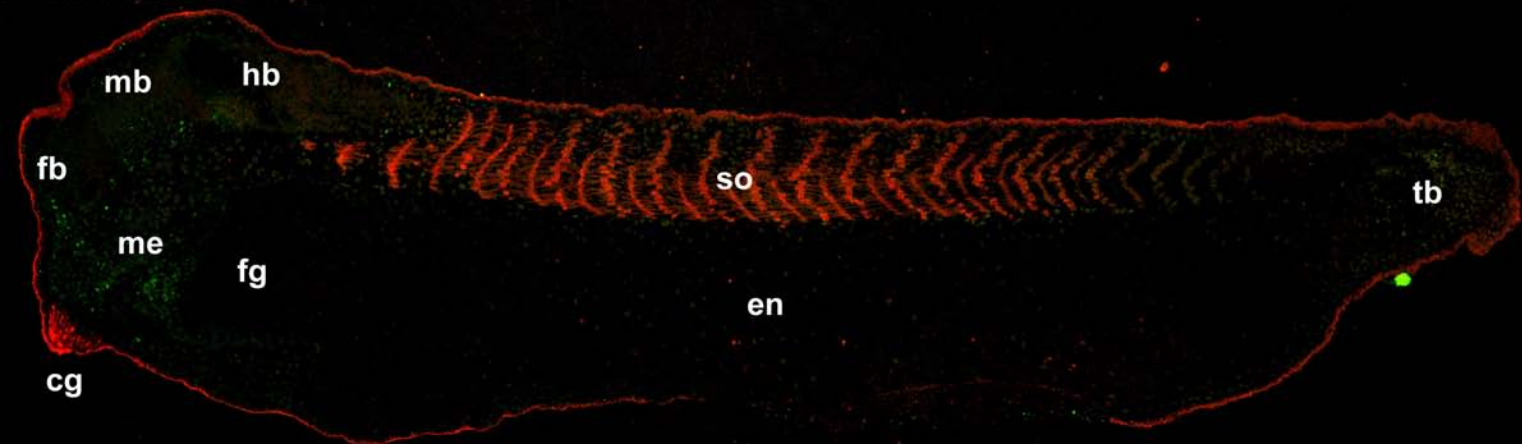

mask: P-Smad2/DAPI

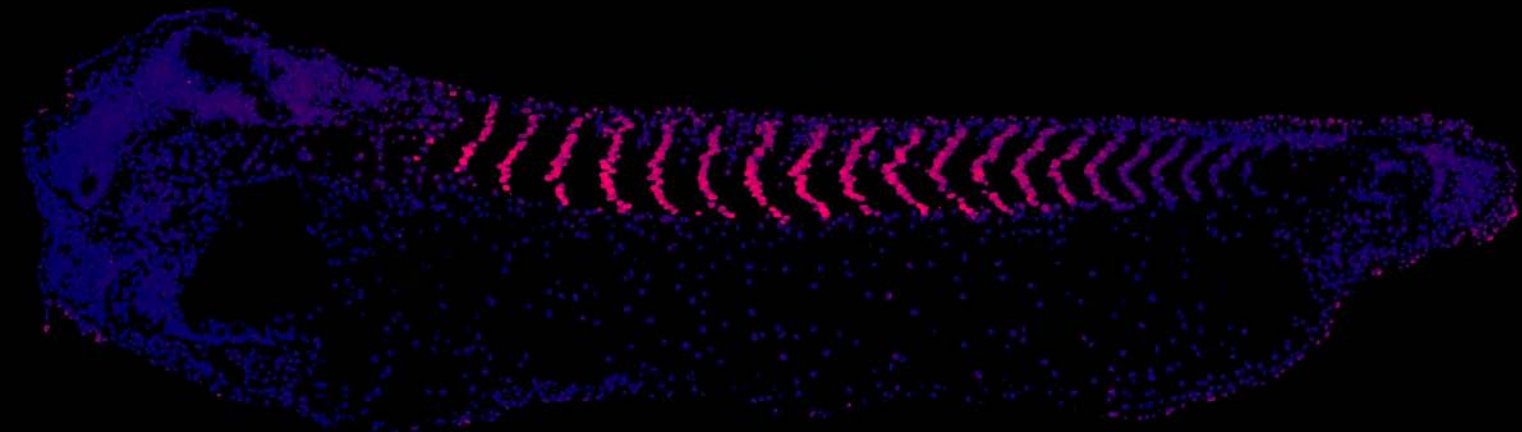

mask: P-MAPK/DAPI

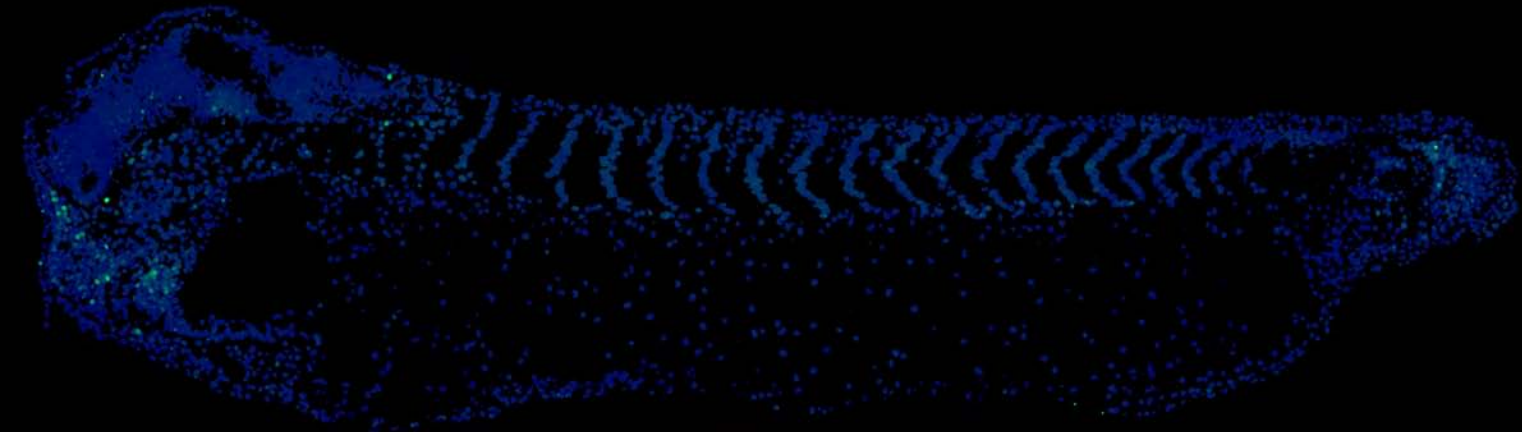

Parasagittal stage 31

P-Smad2/P-MAPK

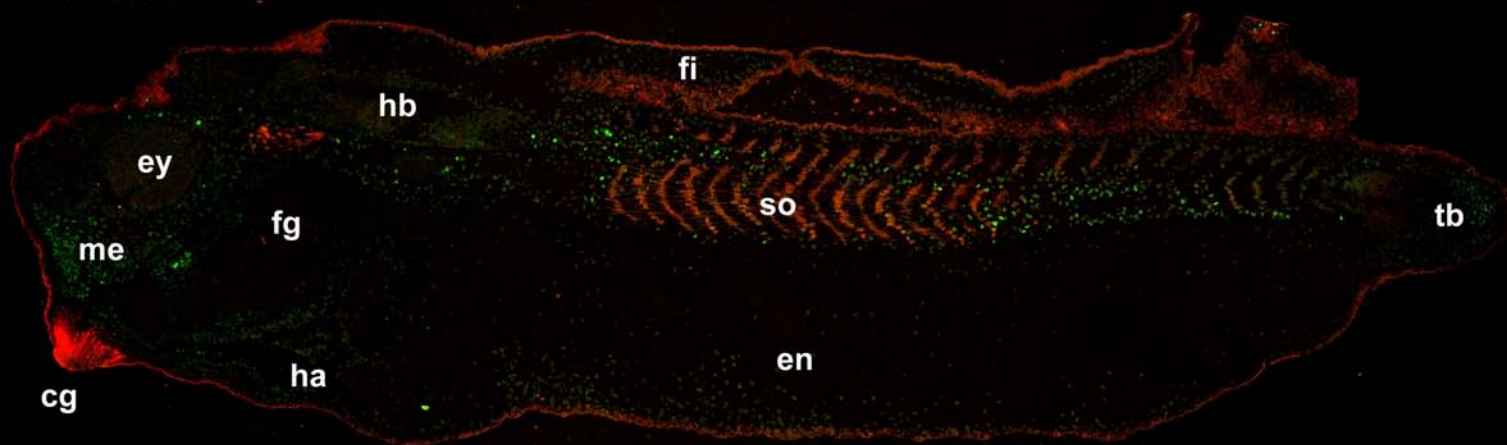

mask: P-Smad2/DAPI

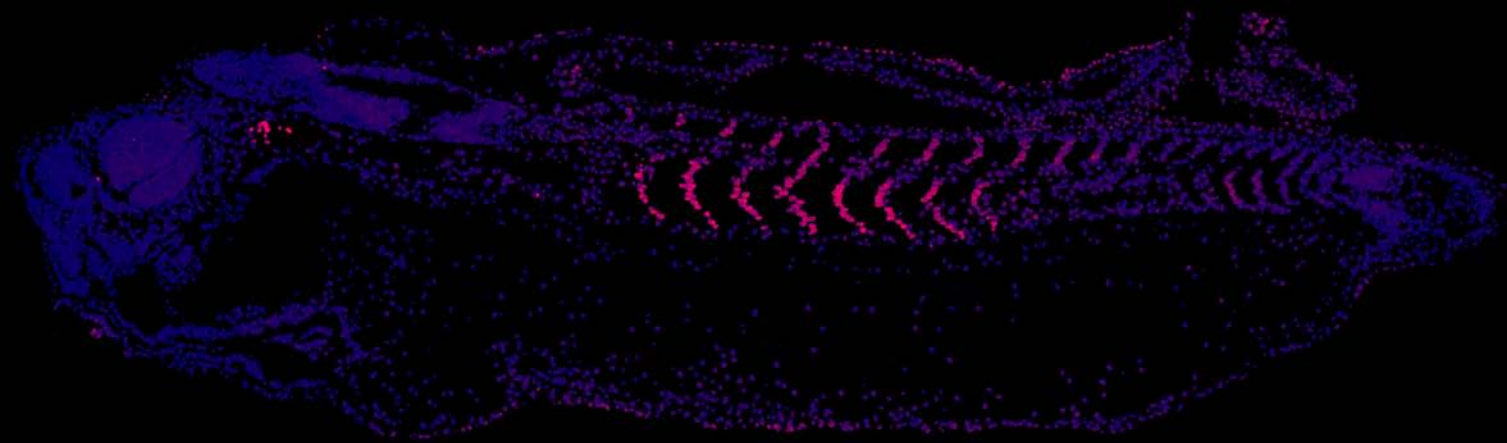

mask: P-MAPK/DAPI

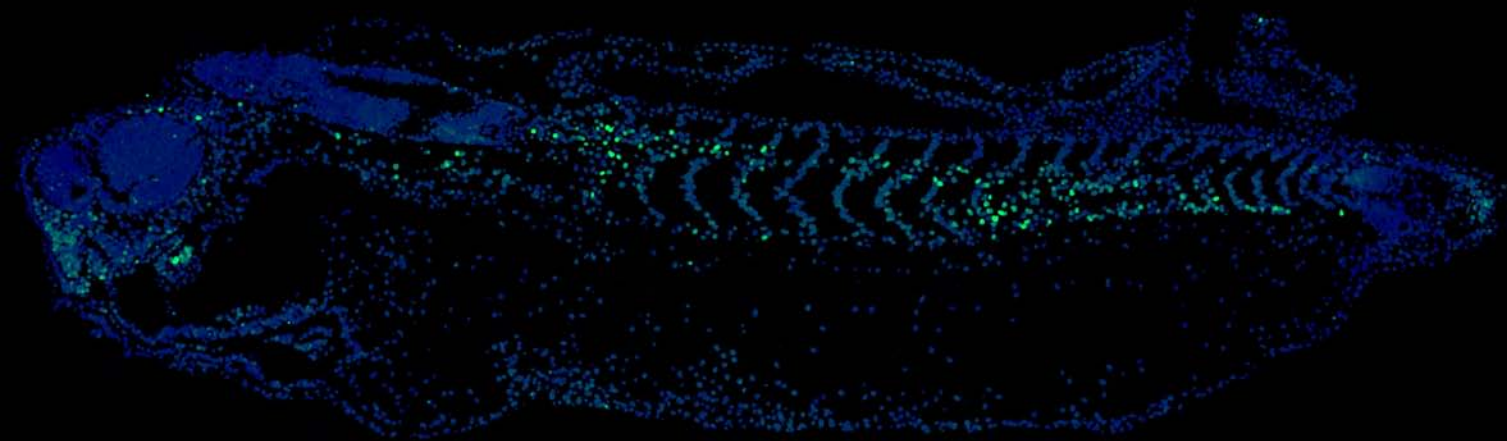

stage 31, head

P-Smad2/P-MAPK

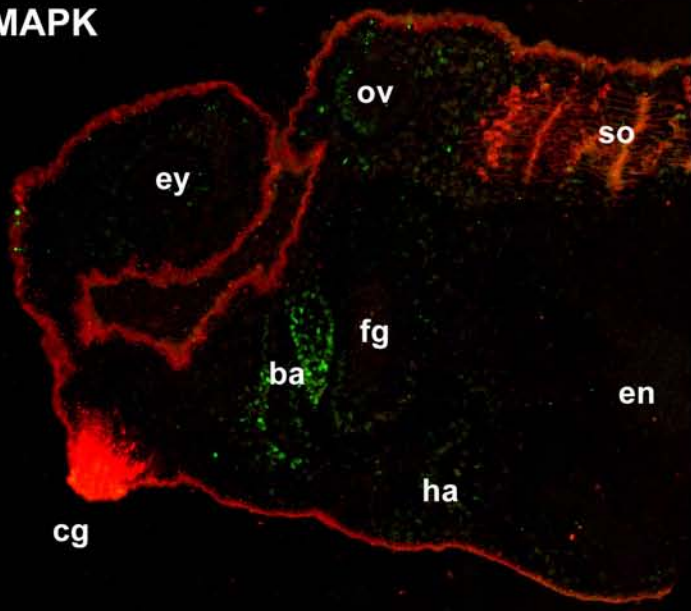

mask: P-Smad2/DAPI

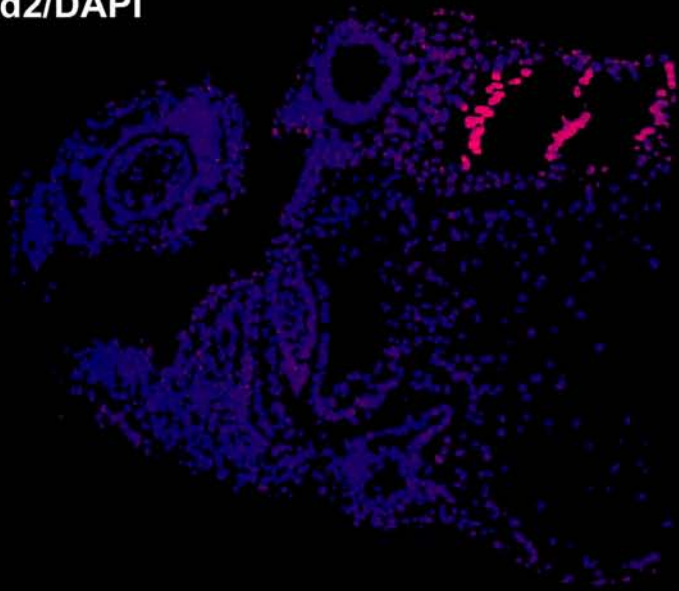

mask: P-MAPK/DAPI

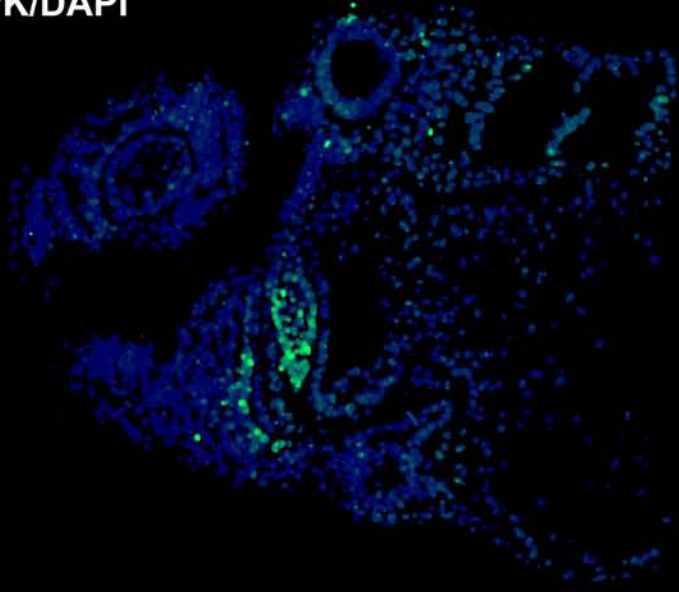

Supplement: dev129137-sup-fig2smad2.pdf [file dev129137-sup-fig2smad2.pdf]
